# Supplementary material for: Prepregnancy body mass index and other risk factors for early-onset and late-onset haemolysis, elevated liver enzymes and low platelets (HELLP) syndrome: a population-based retrospective cohort study in British Columbia, Canada
Source: PubMed Central journal article supplement — BMJ Open. 2024 Mar 23;14(3):e079131. doi: 10.1136/bmjopen-2023-079131 (PMC10961512; doi:10.1136/bmjopen-2023-079131), 2024-03-23
Supplement: bmjopen-2023-079131.draft_revisions.pdf [file bmjopen-2023-079131.draft_revisions.pdf]

# BMJ Open

BMJ Open is committed to open peer review. As part of this commitment we make the peer review history of every article we publish publicly available.

When an article is published we post the peer reviewers' comments and the authors' responses online. We also post the versions of the paper that were used during peer review. These are the versions that the peer review comments apply to.

The versions of the paper that follow are the versions that were submitted during the peer review process. They are not the versions of record or the final published versions. They should not be cited or distributed as the published version of this manuscript.

BMJ Open is an open access journal and the full, final, typeset and author-corrected version of record of the manuscript is available on our site with no access controls, subscription charges or pay-per-view fees (<http://bmjopen.bmj.com>).

If you have any questions on BMJ Open's open peer review process please email [info.bmjopen@bmj.com](mailto:info.bmjopen@bmj.com)

# BMJ Open

**Pre-pregnancy body mass index and other risk factors for early- and late-onset hemolysis, elevated liver enzymes, and low platelets (HELLP) syndrome: A population-based retrospective cohort study.**

|                               |                                                                                                                                                                                                                                                                                                                                                                                                                                                                                                                                                                                                                                                                                                                                                                                                                                                   |
|-------------------------------|---------------------------------------------------------------------------------------------------------------------------------------------------------------------------------------------------------------------------------------------------------------------------------------------------------------------------------------------------------------------------------------------------------------------------------------------------------------------------------------------------------------------------------------------------------------------------------------------------------------------------------------------------------------------------------------------------------------------------------------------------------------------------------------------------------------------------------------------------|
| Journal:                      | <i>BMJ Open</i>                                                                                                                                                                                                                                                                                                                                                                                                                                                                                                                                                                                                                                                                                                                                                                                                                                   |
| Manuscript ID                 | bmjopen-2023-079131                                                                                                                                                                                                                                                                                                                                                                                                                                                                                                                                                                                                                                                                                                                                                                                                                               |
| Article Type:                 | Original research                                                                                                                                                                                                                                                                                                                                                                                                                                                                                                                                                                                                                                                                                                                                                                                                                                 |
| Date Submitted by the Author: | 22-Aug-2023                                                                                                                                                                                                                                                                                                                                                                                                                                                                                                                                                                                                                                                                                                                                                                                                                                       |
| Complete List of Authors:     | <p>Wang, Li Qing; The University of British Columbia Faculty of Medicine, Department of Obstetrics and Gynaecology; BC Children's Hospital Research Institute</p> <p>Bone, Jeffrey; BC Children's Hospital Research Institute, Research Informatics</p> <p>Muraca, Giulia M; Hamilton, Department of Obstetrics and Gynecology</p> <p>Razaz, Neda; Karolinska Institute, Clinical Epidemiology Division, Department of Medicine Solna</p> <p>Joseph, K.S.; The University of British Columbia Faculty of Medicine, Department of Obstetrics and Gynaecology, School of Population and Public Health; BC Children's Hospital Research Institute</p> <p>Lisonkova, Sarka; The University of British Columbia Faculty of Medicine, Obstetrics and Gynaecology, School of Population and Public Health; BC Children's Hospital Research Institute</p> |
| Keywords:                     | Obesity, EPIDEMIOLOGY, OBSTETRICS                                                                                                                                                                                                                                                                                                                                                                                                                                                                                                                                                                                                                                                                                                                                                                                                                 |
|                               |                                                                                                                                                                                                                                                                                                                                                                                                                                                                                                                                                                                                                                                                                                                                                                                                                                                   |

SCHOLARONE™  
Manuscripts

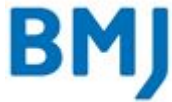

I, the Submitting Author has the right to grant and does grant on behalf of all authors of the Work (as defined in the below author licence), an exclusive licence and/or a non-exclusive licence for contributions from authors who are: i) UK Crown employees; ii) where BMJ has agreed a CC-BY licence shall apply, and/or iii) in accordance with the terms applicable for US Federal Government officers or employees acting as part of their official duties; on a worldwide, perpetual, irrevocable, royalty-free basis to BMJ Publishing Group Ltd ("BMJ") its licensees and where the relevant Journal is co-owned by BMJ to the co-owners of the Journal, to publish the Work in this journal and any other BMJ products and to exploit all rights, as set out in our [licence](#).

The Submitting Author accepts and understands that any supply made under these terms is made by BMJ to the Submitting Author unless you are acting as an employee on behalf of your employer or a postgraduate student of an affiliated institution which is paying any applicable article publishing charge ("APC") for Open Access articles. Where the Submitting Author wishes to make the Work available on an Open Access basis (and intends to pay the relevant APC), the terms of reuse of such Open Access shall be governed by a Creative Commons licence – details of these licences and which [Creative Commons](#) licence will apply to this Work are set out in our licence referred to above.

Other than as permitted in any relevant BMJ Author's Self Archiving Policies, I confirm this Work has not been accepted for publication elsewhere, is not being considered for publication elsewhere and does not duplicate material already published. I confirm all authors consent to publication of this Work and authorise the granting of this licence.

1  
2  
3  
4 1 **Title:** Pre-pregnancy body mass index and other risk factors for early- and late-onset  
5  
6  
7 2 hemolysis, elevated liver enzymes, and low platelets (HELLP) syndrome: A population-  
8  
9  
10 3 based retrospective cohort study.

#### 14 4 **Authors**

15  
16  
17 5 Li Qing WANG<sup>1,2</sup>, BSc; Jeffrey N. BONE<sup>1,2</sup>, MSc; Giulia M MURACA<sup>2,3,4</sup>, MPH, PhD;  
18  
19  
20  
21 6 Neda RAZAZ<sup>5</sup>, MPH, PhD; K.S. JOSEPH<sup>1,2,6</sup>, MD, PhD; Sarka LISONKOVA<sup>1,2,6</sup>, MD, PhD  
22  
23

#### 24 7 **Affiliations**

- 25  
26  
27  
28 8 1. Department of Obstetrics and Gynaecology, University of British Columbia,  
29  
30  
31 9 Vancouver, BC, Canada.
- 32  
33  
34  
35 10 2. BC Children's Hospital Research Institute, Vancouver, BC, Canada.
- 36  
37  
38 11 3. Department of Obstetrics and Gynecology, Faculty of Health Sciences, McMaster  
39  
40  
41  
42 12 University, Hamilton, ON, Canada.
- 43  
44  
45 13 4. Department of Health Research Methods, Evidence and Impact, Faculty of  
46  
47  
48  
49 14 Health Sciences, McMaster University, Hamilton, ON, Canada
- 50  
51  
52 15 5. Clinical Epidemiology Division, Department of Medicine Solna, Karolinska  
53  
54  
55  
56 16 Institutet, Stockholm, Sweden.
- 57  
58  
59  
60

1 Pre-pregnancy BMI and early- and late-onset HELLP syndrome

2  
3  
4  
5 17 6. School of Population and Public Health, University of British Columbia,  
6  
7  
8  
9 18 Vancouver, BC, Canada.

10  
11  
12 19 **Corresponding author**

13  
14  
15 20 Ms. Li Qing Wang

16  
17  
18  
19 21 Address: 950 W 28<sup>th</sup> Ave, Vancouver, BC V5Z 4H4

20  
21  
22 22 Work: 604-875-3015; Cell: 778-513-1648; Email: [liqing.wang@bcchr.ca](mailto:liqing.wang@bcchr.ca)

23  
24  
25  
26  
27 24 **Abstract**

28  
29  
30  
31 25 **Background:** Obesity increases risk of pre-eclampsia, but the association with  
32  
33  
34  
35 26 hemolysis, elevated liver enzymes, and low platelets (HELLP) syndrome is  
36  
37  
38 27 understudied.

39  
40  
41  
42 28 **Objective:** To examine the association between pre-pregnancy body-mass-index (BMI)  
43  
44  
45 29 and HELLP syndrome, including early- vs. late-onset disease.

46  
47  
48 30 **Study Design:** A retrospective cohort study, population-based data.

49  
50  
51  
52 31 **Setting:** British Columbia (BC), Canada, 2008/09-2019/20.

53  
54  
55  
56 32 **Population:** All pregnancies resulting in live births or stillbirths at  $\geq 20$  weeks' gestation.

## Pre-pregnancy BMI and early- and late-onset HELLP syndrome

**Methods:** BMI categories ( $\text{kg}/\text{m}^2$ ) included: underweight ( $<18.5$ ), normal ( $18.5$ - $24.9$ ), overweight ( $25.0$ - $29.9$ ), and obese ( $\geq 30.0$ ). Rates of early- and late-onset HELLP syndrome ( $<34$  vs.  $\geq 34$  weeks, respectively) were calculated per 1000 ongoing pregnancies at 20 and 34 weeks' gestation, respectively. Cox regression was used to assess the associations between risk factors (BMI and, e.g., maternal age, parity) and early- vs late-onset HELLP syndrome.

**Main outcome measures:** HELLP syndrome.

**Results:** The rates of HELLP syndrome per 1000 women were 2.8 overall (1,116 per 391,941 women), and 1.9, 2.5, 3.2 and 4.0 in underweight, normal BMI, overweight and obese categories, respectively. Overall, gestational age-specific rates increased with pre-pregnancy BMI. Adjusted hazard ratio [AHR] was 2.24 for early-onset (95% confidence interval [CI] 1.65-3.04) vs. AHR 1.48 (95% CI 1.23-1.80) for late-onset HELLP syndrome (p-value for interaction 0.025), compared with normal BMI as the reference group. Chronic hypertension, multiple gestation, bleeding ( $<20$  weeks'

## Pre-pregnancy BMI and early- and late-onset HELLP syndrome

gestation and antepartum) also showed differing AHRs between early- vs. late-onset

HELLP.

**Conclusions:** Pre-pregnancy BMI is positively associated with HELLP syndrome and the

association is stronger with early-onset HELLP syndrome. Associations with early- and

late-onset HELLP syndrome differed for some risk factors, suggesting possible

differences in etiologic mechanisms.

### **Strengths and limitations of this study**

- We were able to describe gestational age-specific incidence of HELLP syndrome, which requires population data on all pregnancies.
- Population-based design coupled with detailed information about demographic, behavioural and clinical factors that allowed for robust adjustment for possible confounding.
- We did not have detailed information on laboratory values used for the diagnosis of HELLP syndrome and therefore we were not able to estimate the severity of HELLP.

## Pre-pregnancy BMI and early- and late-onset HELLP syndrome

- 62 • We did not have information about race/ethnicity, socio-economic status (SES)  
63 and prior history of pregnancy with preeclampsia/eclampsia or HELLP syndrome.
- 64 • Pre-pregnancy BMI was largely self-reported. Approximately 25% of women had  
65 missing information about BMI, we used multiple imputation methods to address  
66 this limitation.

### 68 Funding statement

69 This study was funded by the Canadian Institutes for Health Research (CIHR) and the  
70 SickKids Foundation (CIHR SKF – 154852). LW receives support from a CIHR Doctoral  
71 Fellowship, KSJ is supported by an Investigator award from the BC Children's Hospital  
72 Research Institute, Canada, NR is supported by a grant from the Swedish Research  
73 Council for Health, Working Life and Welfare (grant no. 2019-00041). The funding  
74 sources were not involved in study design, data collection, analysis, and interpretation,  
75 writing of the manuscript, and/or decision to submit the article for publication.

### 76 Competing interests statement



1 Pre-pregnancy BMI and early- and late-onset HELLP syndrome

2  
3  
4  
5 77 The authors report no conflict of interest.

6  
7  
8 78 **Key words**

9  
10  
11  
12 79 Hypertensive disorders of pregnancy, pregnancy complications, overweight, obesity,  
13  
14  
15  
16 80 pre-pregnancy counseling, etiology, adverse pregnancy outcome, BMI, HELLP  
17  
18  
19 81 syndrome.

20  
21  
22 82 **Word count: 3036**

23  
24  
25  
26 83

27  
28  
29  
30 84

31  
32  
33 85

34  
35  
36 86

37  
38  
39  
40 87

41  
42  
43 88

44  
45  
46  
47 89

48  
49  
50 90

51  
52  
53  
54 91

## Pre-pregnancy BMI and early- and late-onset HELLP syndrome

92

93

94

95

96

### 97 Introduction

98 Hypertensive disorders of pregnancy, such as pre-eclampsia (PE), are among the  
99 leading causes of maternal morbidity and mortality, affecting 3-5% of pregnancies  
100 worldwide<sup>1,2</sup> and accounting for up to 14% of maternal deaths.<sup>3</sup> Early-onset PE at <34  
101 weeks' gestation is often associated with placental insufficiency whereas late-onset PE  
102 is often associated with pre-existing maternal health conditions such as metabolic  
103 syndrome and obesity.<sup>4</sup> Early- vs late-onset PE differ in some risk factors, clinical  
104 management and rates of adverse perinatal outcomes.<sup>5,6</sup> Hemolysis, elevated liver  
105 enzymes, and low platelets (HELLP) syndrome occurs in 0.2-0.8% of pregnancies<sup>7-9</sup>  
106 and 10-20% of cases of severe PE.<sup>10</sup> Although HELLP syndrome has been

## Pre-pregnancy BMI and early- and late-onset HELLP syndrome

107 distinguished from PE as a separate disease,<sup>11</sup> it is still widely regarded as a form of  
108 severe PE.<sup>9</sup> While the distinction between early- and late-onset PE and the differences  
109 in the association with pre-pregnancy obesity has been established, these differences  
110 have not been studied in HELLP syndrome.

111 Pre-pregnancy obesity is a known modifiable risk factor for pre-eclampsia.<sup>12-15</sup> To  
112 date, the world prevalence of obesity has nearly tripled since 1975<sup>16</sup> and the proportion  
113 of pregnant women with obesity ranges from 1.8% to 25.3% globally.<sup>17</sup> The prevalence  
114 of pre-pregnancy obesity was 17.8% in 2012-2016 in Ontario, Canada<sup>18</sup> and 29.0% in  
115 2019 in the United States.<sup>19</sup> Despite the large increases in obesity in high income  
116 countries, the association between maternal pre-pregnancy body-mass-index (BMI) and  
117 HELLP syndrome has not been adequately assessed in a large population-based study  
118 to date.

119 We carried out a population-based, retrospective cohort study to examine the  
120 association between maternal pre-pregnancy BMI and HELLP syndrome and to assess  
121 differences in this association in early- vs late-onset HELLP syndrome. We

## Pre-pregnancy BMI and early- and late-onset HELLP syndrome

122 hypothesized that maternal obesity is a risk factor for HELLP syndrome, and this  
123 relationship may be different in early- compared with late-onset disease. In additional  
124 analyses, we examined other risk factors for HELLP syndrome in terms of their  
125 association with early- vs late-onset HELLP syndrome.

### 126 **Materials and Methods**

#### 127 *Data sources and study population*

128 The study included all live births and stillbirths at  $\geq 20$  weeks' gestation in British  
129 Columbia, Canada, between April 1, 2008 and March 31, 2020, with data obtained from  
130 the British Columbia Perinatal Database Registry (BCPDR).<sup>20</sup> The BCPDR includes  
131 information on >99% of births in BC, with detailed data on maternal demographic  
132 characteristics, prenatal care, pregnancy complications, labor and delivery  
133 characteristics and neonatal outcomes. Each record, abstracted from medical charts (or  
134 midwives' notes), includes also up to 25 ICD-10-CA (International Classification of  
135 Diseases, 10<sup>th</sup> Edition, Canada) codes for diagnoses related to delivery hospitalization  
136 and following hospital transfers if applicable. Chart abstraction is standardized and

1 Pre-pregnancy BMI and early- and late-onset HELLP syndrome

2  
3  
4  
5 137 conducted by trained personnel, and data quality is routinely assessed. Prior validation  
6  
7  
8 138 studies showed high accuracy of collected information on labor and delivery.<sup>21</sup>

9  
10  
11  
12  
13 139 *Pre-pregnancy BMI and HELLP syndrome*

14  
15  
16  
17 140 Pre-pregnancy weight and height were based on maternal self-report or health care  
18  
19  
20 141 provider assessment at  $\leq 11$  weeks' gestation.<sup>22</sup> Body-mass-index (BMI) was classified  
21  
22  
23 142 as follows (in kg/m<sup>2</sup>): underweight ( $< 18.5$ ), normal (18.5-24.9), overweight (25.0-29.9),  
24  
25  
26  
27 143 and obese ( $\geq 30.0$ ).<sup>23</sup> The primary outcome of this study was a physician diagnosis of  
28  
29  
30  
31 144 HELLP syndrome in the medical chart, abstracted and recorded in the BCPDR. In  
32  
33  
34 145 Canada, HELLP syndrome is typically diagnosed by the following criteria: LDH  $\geq 600$   
35  
36  
37  
38 146 IU/l, liver transaminases (AST and ALT) elevated more than twice the upper limit of  
39  
40  
41 147 normal, and a platelet count  $< 100,000/\mu\text{l}$  ( $10^9/\text{l}$ ). Early- and late-onset HELLP syndrome  
42  
43  
44  
45 148 were defined as HELLP syndrome with delivery at  $< 34$  weeks and  $\geq 34$  weeks'  
46  
47  
48 149 gestation, respectively. Early pregnancy ultrasound was used to ascertain gestational  
49  
50  
51  
52 150 age, and last menstrual period was used for those with missing early pregnancy  
53  
54  
55 151 ultrasound.

1 Pre-pregnancy BMI and early- and late-onset HELLP syndrome

2  
3  
4  
5 152 ***Covariates***

6  
7  
8  
9 153 In addition to BMI, we examined the association between maternal age, nulliparity, pre-  
10  
11  
12 154 existing diabetes, chronic hypertension, *in vitro* fertilization (IVF) conception, multiple  
13  
14  
15  
16 155 gestation, bleeding before 20 weeks, antepartum bleeding or hemorrhage, substance  
17  
18  
19 156 use and smoking during pregnancy and early- vs. late-onset HELLP syndrome. Alcohol  
20  
21  
22  
23 157 use and prior adverse birth outcomes (prior stillbirth or neonatal death) were included as  
24  
25  
26 158 potential confounders; all these factors are known to be associated with HELLP  
27  
28  
29  
30 159 syndrome.<sup>24</sup> Maternal age was categorized as <25, 25-34 and ≥35 years. All chronic  
31  
32  
33 160 conditions and pregnancy complications were identified using ICD-10 codes or data  
34  
35  
36 161 fields abstracted from medical charts to the BCPDR (Table A.1).

37  
38  
39  
40 162 ***Statistical analyses***

41  
42  
43 163 The rates of HELLP syndrome per 1000 deliveries were compared between women in  
44  
45  
46  
47 164 each BMI category. Complete case analyses were performed for individuals with known  
48  
49  
50  
51 165 BMI. The association between pre-pregnancy BMI and HELLP syndrome was

1 Pre-pregnancy BMI and early- and late-onset HELLP syndrome

2  
3  
4  
5 166 expressed using crude hazard ratios (HR) and 95% confidence intervals (CI), obtained  
6  
7  
8  
9 167 from a Cox model without adjustment for other risk factors.

10  
11  
12 168 Gestational age-specific rates of HELLP syndrome were compared between  
13  
14  
15  
16 169 women in the various BMI categories, using undelivered pregnancies at each  
17  
18  
19 170 gestational week as the denominator. These rates were plotted, and splines with 95%  
20  
21  
22  
23 171 confidence intervals were fitted by the generalized additive model (“gam”) smoothing  
24  
25  
26 172 method. Cox models with interaction terms between pre-pregnancy BMI categories and  
27  
28  
29  
30 173 gestational age at HELLP onset (<34 vs ≥34 weeks’ gestation) were used to obtain  
31  
32  
33 174 crude HRs and 95% CIs. This analysis was carried out to assess whether gestational  
34  
35  
36  
37 175 age at onset modified the association between BMI and HELLP syndrome.

38  
39  
40 176 In multivariable analyses, Cox models were also used to adjust for covariates  
41  
42  
43  
44 177 (listed above) and to also examine their associations with early- vs late-onset of HELLP  
45  
46  
47 178 syndrome using interaction terms. We did not assess early- vs late-onset of HELLP  
48  
49  
50  
51 179 syndrome interactions with risk factors including alcohol use and prior adverse birth  
52  
53  
54  
55  
56  
57  
58  
59  
60

1 Pre-pregnancy BMI and early- and late-onset HELLP syndrome

2  
3  
4  
5 180 outcomes due to a low number of women with HELLP in these categories, but adjusted  
6  
7  
8  
9 181 for them in the model as potential confounders.

10  
11  
12 182 Sensitivity analyses included multiple imputations for missing BMI values based  
13  
14  
15  
16 183 on a multiple imputation procedure using SAS statistical software (PROC MI).<sup>25</sup>  
17  
18  
19 184 Variables included in the imputation were those also included in the regression  
20  
21  
22  
23 185 analyses. Ten imputed datasets were created, with the final results obtained using  
24  
25  
26 186 Rubin's rule.<sup>26</sup> All analyses were repeated with the imputed dataset and results were  
27  
28  
29  
30 187 compared with the primary analyses.

31  
32  
33 188 All analyses were carried out using SAS version 9.4 (SAS Institute, Inc., Cary,  
34  
35  
36  
37 189 NC) and R version 4.0.3.<sup>27</sup> Ethics approval was obtained from the University of British  
38  
39  
40 190 Columbia/Children's and Women's Hospital and Health Centre of British Columbia  
41  
42  
43  
44 191 Research Ethics Board (#H20-03985).

#### 45 46 47 192 *Patient and Public Involvement*

48  
49  
50  
51 193 Patients or the public WERE NOT involved in the design, or conduct, or reporting, or  
52  
53  
54  
55 194 dissemination plans of our research.



## Pre-pregnancy BMI and early- and late-onset HELLP syndrome

195

### 196 **Results**

#### 197 *Study population*

198 Overall, 538,683 women had a live birth or stillbirth in British Columbia between April 1,  
199 2008 and March 31, 2020 (Supplemental Figure 1). Records with missing gestational  
200 age or those with <20 weeks' gestation were excluded (n=14,206, 2.6%). The study  
201 population for the primary analyses included 391,941 pregnancies, after exclusion of  
202 women with missing BMI (n = 132,536; 24.6%). The overall incidence of HELLP  
203 syndrome was 2.85 (95% CI 2.68-3.01) per 1000 pregnancies (n = 1,116).

204 The proportion of women who were in underweight, normal BMI, overweight and  
205 obese categories prior to pregnancy was 5.7%, 59.1%, 21.4%, and 13.8%, respectively.

206 Pre-existing diabetes, chronic hypertension, prior adverse pregnancy outcomes  
207 (stillbirth or neonatal death), multiple gestation, gestational hypertension, gestational  
208 diabetes, proteinuria, and alcohol use during pregnancy were more frequent in women  
209 with overweight and obesity compared with women with normal BMI (Table 1).

1 Pre-pregnancy BMI and early- and late-onset HELLP syndrome

2  
3  
4  
5 210 Nulliparity and ultrasound diagnosed fetal growth restriction were observed more  
6  
7  
8  
9 211 frequently in the underweight group. Substance use and smoking during pregnancy  
10  
11  
12 212 were more frequent in underweight, overweight, and obese groups compared with  
13  
14  
15  
16 213 women with normal BMI.

17  
18  
19 214

20  
21  
22  
23 215 *Unadjusted analyses for pre-pregnancy BMI*

24  
25  
26 216 The rates of HELLP syndrome in women in underweight, normal, overweight, and  
27  
28  
29  
30 217 obese categories were 1.9, 2.5, 3.2, and 4.0 per 1000 pregnancies, respectively (Table  
31  
32  
33 218 2). Overall, crude HRs for HELLP syndrome in women who were in the overweight and  
34  
35  
36  
37 219 obese categories were 1.29 (95% CI 1.12-1.49) and 1.62 (95% CI 1.39-1.90),  
38  
39  
40 220 respectively, compared with women who had normal BMI (Table A.2).

41  
42  
43 221 The rates of early- and late-onset HELLP syndrome were 0.7 (n=275) and 2.2  
44  
45  
46  
47 222 (n=841) per 1000 ongoing pregnancies at 20 weeks' and 34 weeks' gestation,  
48  
49  
50  
51 223 respectively (Table A.3). Most cases of HELLP syndrome occurred at or after 34 weeks  
52  
53  
54 224 (75.4%; 841 out of total 1116 cases). Frequencies of overweight and obesity, older

1 Pre-pregnancy BMI and early- and late-onset HELLP syndrome

2  
3  
4  
5 225 maternal age ( $\geq 35$ ), pre-existing diabetes, chronic hypertension, multiple gestation,  
6  
7  
8 226 bleeding before 20 weeks of gestation, antepartum bleeding/hemorrhage, substance  
9  
10  
11  
12 227 use and smoking were higher among women with early-onset vs. late-onset HELLP  
13  
14  
15 228 syndrome. Frequencies of underweight, younger maternal age ( $< 25$  years), nulliparity,  
16  
17  
18  
19 229 IVF conception, and alcohol use were higher among women with late-onset HELLP  
20  
21  
22  
23 230 syndrome (Table A.3).

24  
25  
26 231 The rates of late-onset HELLP syndrome were higher than early-onset HELLP  
27  
28  
29 232 syndrome regardless of BMI category and maternal age group (Table 2). Nulliparous  
30  
31  
32  
33 233 women, those with pre-existing diabetes, chronic hypertension, prior stillbirth/neonatal  
34  
35  
36 234 death, IVF conception, multiple gestation, alcohol use and substance use also had  
37  
38  
39  
40 235 higher rates of late-onset than early-onset HELLP syndrome. Women with multiple  
41  
42  
43  
44 236 gestation had highest rate of HELLP syndrome, followed by those with chronic  
45  
46  
47 237 hypertension.

## Pre-pregnancy BMI and early- and late-onset HELLP syndrome

238 Differences in gestational age-specific incidence rates of HELLP syndrome by  
239 BMI group are shown in Figure 1 (Panel A; Panel B shows log-transformed gestational-  
240 age specific rates).

241 Gestational age-specific rates of HELLP syndrome increased over the course of  
242 pregnancy, with higher rates at 36-37 weeks and a subsequent decline among women  
243 with pre-pregnancy BMI below or above normal values but not among those with normal  
244 BMI (Figure 1, Table A.4). Crude analyses showed that HRs for early-onset HELLP  
245 syndrome in women in overweight and obese groups were 1.62 (95% CI 1.21-2.16) and  
246 2.37 (95% CI 1.77-3.18), respectively, compared with women with normal BMI. These  
247 HRs were 1.21 (95% CI 1.02-1.42) and 1.42 (95% CI 1.17-1.71) for late-onset HELLP  
248 syndrome, respectively (Table A.2).

249

### 250 *Adjusted analyses*

251 The associations did not change substantially after adjusting for other risk factors (Table  
252 3). Gestational age at onset of HELLP syndrome modified the effect of maternal BMI on

1 Pre-pregnancy BMI and early- and late-onset HELLP syndrome

2  
3  
4  
5 253 HELLP syndrome, but only in the obese group. Specifically, obesity was more strongly  
6  
7  
8  
9 254 associated with early-onset HELLP syndrome (AHR 2.24) than with late-onset HELLP  
10  
11  
12 255 syndrome (AHR 1.48, p-value for interaction = 0.025; Table 3).  
13  
14

15  
16 256 Adjusted hazard ratios (AHR) for each risk factor calculated separately for early-  
17  
18  
19 257 vs late-onset HELLP syndrome are shown in Table 3. Risk factors significantly  
20  
21  
22 258 associated with HELLP syndrome included overweight, obesity, advanced maternal age  
23  
24  
25  
26 259 ( $\geq 35$  years), nulliparity, pre-existing diabetes, chronic hypertension, multiple gestation,  
27  
28  
29  
30 260 and antepartum bleeding/hemorrhage. Smoking during pregnancy had an inverse  
31  
32  
33 261 association with HELLP syndrome. IVF conception was a risk factor for late-onset but  
34  
35  
36  
37 262 not early-onset HELLP syndrome. Bleeding before 20 weeks and antepartum  
38  
39  
40 263 bleeding/hemorrhage were risk factors for early-onset but not late-onset HELLP  
41  
42  
43  
44 264 syndrome. Obesity ( $p=0.025$ ), chronic hypertension ( $p=0.041$ ), multiple gestation  
45  
46  
47 265 ( $p=0.001$ ), bleeding before 20 weeks ( $p=0.008$ ) and antepartum bleeding/hemorrhage  
48  
49  
50  
51 266 ( $p=0.011$ ) differed significantly in their associations with early versus late-onset HELLP  
52  
53  
54 267 syndrome (p-values for interaction).  
55  
56  
57  
58  
59  
60

1 Pre-pregnancy BMI and early- and late-onset HELLP syndrome

2  
3  
4  
5 268 ***Sensitivity analyses***

6  
7  
8 269 Women with missing BMI were not substantially different from women with known BMI  
9  
10  
11  
12 270 (Table A.5); and the results were not appreciably changed after the analyses were  
13  
14  
15  
16 271 repeated using imputed BMI values (Table A.6).

17  
18  
19 272

20  
21  
22 273 **Discussion**

23  
24  
25  
26 274 ***Main findings***

27  
28  
29 275 To our knowledge, this is the largest contemporary study examining the association  
30  
31  
32  
33 276 between pre-pregnancy BMI and HELLP syndrome, including early- and late-onset  
34  
35  
36  
37 277 disease. We showed that the majority of HELLP syndrome (75.4%) occurred at or after  
38  
39  
40 278 34 weeks' gestation, with the rate of early-onset HELLP syndrome being substantially  
41  
42  
43  
44 279 lower than that of late-onset HELLP syndrome. Women in overweight or obese groups  
45  
46  
47 280 were at elevated risk for developing HELLP syndrome. Obesity was more strongly  
48  
49  
50  
51 281 associated with early-onset than late-onset HELLP syndrome. In addition to BMI, our  
52  
53  
54 282 study showed that chronic hypertension, bleeding before 20 weeks' gestation and  
55  
56  
57  
58  
59  
60

1 Pre-pregnancy BMI and early- and late-onset HELLP syndrome

2  
3  
4  
5 283 antepartum bleeding/hemorrhage were stronger risk factors for early-onset HELLP

6  
7  
8 284 syndrome, whereas multiple gestation was a stronger risk factor for late-onset HELLP

9  
10  
11  
12 285 syndrome.

13  
14  
15 286 *Interpretation in the context of scientific literature*

16  
17  
18  
19 287 The rate of HELLP syndrome in our study (2.8 per 1000 women) was similar to the

20  
21  
22 288 previously reported rate of 2.5 per 1000 singleton pregnancies in Canada in 2012-

23  
24  
25  
26 289 2016.<sup>24</sup> Prior studies describing the association between pre-pregnancy obesity and

27  
28  
29  
30 290 HELLP syndrome are sparse and results vary. In a retrospective cohort study from a

31  
32  
33 291 single tertiary hospital in the United States (n=434), Martin *et al.* found that maternal

34  
35  
36 292 weight was not associated with HELLP syndrome.<sup>28</sup> Similarly, a case-control study (n=

37  
38  
39  
40 293 129 cases and 476 controls) found no association between obesity and HELLP

41  
42  
43 294 syndrome.<sup>29</sup> Furthermore, a retrospective case-control study (including n=687 cases

44  
45  
46  
47 295 and 601 controls) showed that pre-pregnancy BMI was associated with PE but not

48  
49  
50 296 HELLP syndrome and suggested that PE and HELLP may have different

51  
52  
53  
54 297 pathophysiology.<sup>12</sup> In contrast, a population-based cohort study from Norway

1 Pre-pregnancy BMI and early- and late-onset HELLP syndrome

2  
3  
4  
5 298 (n=418,897) found that pre-pregnancy BMI  $\geq 30\text{kg/m}^2$  was associated with HELLP  
6  
7  
8  
9 299 syndrome in the first but not the second pregnancy.<sup>9</sup> However, in that study, only 25%  
10  
11  
12 300 of women with a first pregnancy and 30% of women with their second pregnancy had  
13  
14  
15 301 information on BMI. More recently, a population-based study from Canada  
16  
17  
18  
19 302 (n=1,078,323) showed that obesity documented in medical charts was a risk factor for  
20  
21  
22  
23 303 HELLP syndrome,<sup>30</sup> however, obesity rates were underestimated and information on  
24  
25  
26 304 BMI was not available, precluding more detailed analyses.

27  
28  
29 305 While PE is typically recognized as early- vs late-onset disease (before vs  $\geq 34$   
30  
31  
32  
33 306 weeks gestation, respectively), this distinction is rarely made for HELLP syndrome. A  
34  
35  
36  
37 307 prior population-based cohort study (n=96,861) showed that high pre-pregnancy BMI is  
38  
39  
40 308 a stronger risk factor for late-onset PE than early-onset PE.<sup>15</sup> That study also  
41  
42  
43  
44 309 demonstrated a correlation between increased prevalence of maternal obesity in  
45  
46  
47 310 parallel with late-onset PE during the 18-year period, while the incidence of early-onset  
48  
49  
50  
51 311 PE stayed relatively constant.<sup>15</sup> In contrast, our study shows a stronger association  
52  
53  
54 312 between overweight/obesity and early-onset HELLP syndrome compared with late-



1 Pre-pregnancy BMI and early- and late-onset HELLP syndrome

2  
3  
4  
5 313 onset HELLP syndrome. This suggests varying pathophysiological pathways between  
6  
7  
8  
9 314 PE and HELLP syndrome or additional obesity-related pathophysiology associated with  
10  
11  
12 315 PE that leads to liver damage at earlier gestation, for instance, obesity-associated  
13  
14  
15 316 steatosis and non-alcoholic fatty liver disease.<sup>31</sup> We chose the same gestational age  
16  
17  
18  
19 317 cut-off of 34 weeks for early- vs late-onset HELLP syndrome as in pre-eclampsia.  
20  
21  
22  
23 318 However, our data suggest an increase in gestational age-specific rates after 28 weeks'  
24  
25  
26 319 gestation in women with obesity and after 30 weeks' gestation in women without  
27  
28  
29  
30 320 obesity. A previous study showed a high proportion of HELLP syndrome cases  
31  
32  
33 321 occurring between 27 and 37 weeks<sup>32</sup> which indicates potential dissimilarities with early-  
34  
35  
36  
37 322 vs late-onset PE. Chronic hypertension, however, was found to be a stronger risk factor  
38  
39  
40 323 for early-onset disease for both PE<sup>6</sup> and HELLP syndrome compared with late-onset  
41  
42  
43  
44 324 disease. It is worth mentioning that the known inverse association between smoking  
45  
46  
47 325 and PE<sup>6</sup> was also observed in HELLP syndrome in our study, and this warrants further  
48  
49  
50  
51 326 investigations.

52  
53  
54 327 ***Clinical and research implications***

1 Pre-pregnancy BMI and early- and late-onset HELLP syndrome  
2  
3  
4

5 328 Our findings show that increases in gestational age-specific rates of HELLP syndrome  
6  
7  
8 329 vary by maternal pre-pregnancy BMI. The rates declined after 37 weeks' gestation in  
9  
10  
11  
12 330 women who were in the underweight, overweight and obese categories, but continued  
13  
14  
15 331 increasing in women with normal BMI. This could be due to higher rates of medically  
16  
17  
18  
19 332 indicated early-term deliveries in groups with low or high BMI, which has been shown to  
20  
21  
22  
23 333 reduce maternal morbidity compared with expectant management.<sup>33</sup> It is possible that  
24  
25  
26 334 women whose pre-pregnancy BMI was below and above normal range were more likely  
27  
28  
29  
30 335 to be considered at-risk (due to the abnormal BMI or associated co-morbidity) and  
31  
32  
33 336 delivered at early term (37-38 weeks) to prevent adverse maternal and infant outcomes.  
34  
35  
36  
37 337 In addition to BMI, we also showed that chronic hypertension, bleeding before 20  
38  
39  
40 338 weeks' gestation and antepartum bleeding/hemorrhage were more strongly associated  
41  
42  
43  
44 339 with early- onset HELLP syndrome, while multiple gestation was more strongly  
45  
46  
47 340 associated with late-onset HELLP syndrome. These findings suggest that risk factors for  
48  
49  
50  
51 341 HELLP syndrome have varied clinical relevance based on gestational age at onset of  
52  
53  
54 342 the disease.  
55  
56  
57  
58  
59  
60

1 Pre-pregnancy BMI and early- and late-onset HELLP syndrome  
2  
3  
4

5 343 ***Strengths and limitations***  
6

7  
8 344 The strengths of this study include its population-based design coupled with detailed  
9  
10  
11  
12 345 information about demographic, behavioural and clinical factors that allowed for robust  
13  
14  
15 346 adjustment for possible confounding. We had a large enough sample to provide precise  
16  
17  
18  
19 347 estimates for associations with HELLP syndrome, a rare outcome.  
20  
21

22 348 This study also has several limitations. First, we did not have detailed information  
23  
24  
25  
26 349 on laboratory values important for the diagnosis of HELLP syndrome and therefore we  
27  
28  
29  
30 350 were not able to estimate the severity of HELLP. We assumed that the diagnosis of  
31  
32  
33 351 HELLP syndrome would lead to a prompt delivery to prevent worsening of maternal  
34  
35  
36  
37 352 condition. However, in milder cases, expectant management with close observation  
38  
39  
40 353 may have led to a delay between the diagnosis and delivery, especially at very preterm  
41  
42  
43  
44 354 gestation. As a result, incidence of early-onset HELLP syndrome may have been  
45  
46  
47 355 underestimated in our study. However, we do not expect a large inaccuracy in this  
48  
49  
50  
51 356 regard because HELLP syndrome is considered a potentially life-threatening condition  
52  
53  
54 357 and delivery is typically not delayed. Second, we did not have information about  
55  
56  
57  
58  
59  
60

1 Pre-pregnancy BMI and early- and late-onset HELLP syndrome

2  
3  
4  
5 358 race/ethnicity, socio-economic status (SES) and prior history of pregnancy with  
6  
7  
8  
9 359 PE/eclampsia or HELLP syndrome, which could have resulted in residual confounding  
10  
11  
12 360 in the assessments of the relation between BMI and HELLP syndrome. However, we  
13  
14  
15 361 adjusted for several possible confounders and did not observe changes in the  
16  
17  
18  
19 362 association between BMI and HELLP syndrome, suggesting that our results are robust.  
20  
21  
22 363 Third, pre-pregnancy BMI was largely self-reported, which may have led to some  
23  
24  
25  
26 364 misclassification. Several validation studies have shown relatively good accuracy of  
27  
28  
29 365 self-reported weight and height for epidemiological studies,<sup>34-36</sup> suggesting that a large  
30  
31  
32  
33 366 misclassification bias is unlikely. A systematic review of BMI self-report  
34  
35  
36  
37 367 misclassifications showed minimal influence on associations of BMI with pregnancy  
38  
39  
40 368 outcomes.<sup>37</sup>

41  
42  
43 369 Approximately 25% of women had missing information about BMI. These women  
44  
45  
46  
47 370 were relatively similar to those with known BMI and sensitivity analyses using imputed  
48  
49  
50  
51 371 BMI values yielded results almost identical to the main analyses. Lastly, the analyses  
52  
53  
54  
55  
56  
57  
58  
59  
60

1 Pre-pregnancy BMI and early- and late-onset HELLP syndrome

2  
3  
4  
5 372 examining differences between early- and late-onset HELLP and risk factors other than  
6  
7  
8  
9 373 BMI were exploratory, and further studies are required to confirm our findings.

10  
11  
12 374

13  
14  
15 375 ***Conclusions***

16  
17  
18  
19 376 Consistent with what is known about PE, pre-pregnancy BMI was found to be a risk  
20  
21  
22 377 factor for HELLP syndrome. However, contrary to the documented association between  
23  
24  
25  
26 378 BMI and PE, with obesity being associated more strongly with late-onset than early-  
27  
28  
29 379 onset PE, our study showed that obesity was more strongly associated with early-onset  
30  
31  
32  
33 380 than with late-onset HELLP syndrome. This information suggests different underlying  
34  
35  
36  
37 381 pathophysiology of the various hypertensive disorders of pregnancy. Our findings can  
38  
39  
40 382 help maternity care providers with regard to pre-pregnancy counselling. Clinicians can  
41  
42  
43  
44 383 better identify women who may benefit from obstetric intervention, as the risk of HELLP  
45  
46  
47 384 increases at late pre-term gestation in all women and continues to increase at term and  
48  
49  
50  
51 385 post-term gestation in women with normal pre-pregnancy BMI. More research on the  
52  
53  
54  
55  
56  
57  
58  
59  
60

1 Pre-pregnancy BMI and early- and late-onset HELLP syndrome

2  
3  
4  
5 386 gestational-age specific effects of pre-pregnancy BMI is needed to elucidate the

6  
7  
8  
9 387 underlying causes of HELLP syndrome.

10  
11  
12 388

13  
14  
15  
16  
17  
18  
19  
20  
21  
22  
23  
24  
25  
26  
27  
28  
29  
30  
31  
32  
33  
34  
35  
36  
37  
38  
39  
40  
41  
42  
43  
44  
45  
46  
47  
48  
49  
50  
51  
52  
53  
54  
55  
56  
57  
58  
59  
60

For peer review only

1 Pre-pregnancy BMI and early- and late-onset HELLP syndrome  
2  
3  
4

5 389 **Disclosure**  
6  
7

8  
9 390 The authors report no conflict of interest.  
10  
11

12 391 **Disclaimer**  
13  
14  
15

16 392 All inferences, opinions, and conclusions drawn in this publication are those of the  
17  
18

19  
20 393 authors, and do not reflect the opinions or policies of Perinatal Services BC.  
21  
22  
23

24 394 **Author Statement/Contribution to Authorship**  
25  
26  
27

28 395 LW and SL were involved in the conception, planning, carrying out and analyzing data  
29  
30

31 396 of the project. JNB, GMM, KSJ and NR provided helpful suggestions for the analysis.  
32  
33  
34

35 397 LW led the writing of the manuscript and received feedback from JNB, GMM, SL, KSJ,  
36  
37

38 398 NR.  
39  
40  
41  
42

43 399 **Acknowledgement**  
44  
45

46 400 We thank the Women's Health Research Institute (WHRI) for providing us with access  
47  
48

49 401 to the BCPDR database.  
50  
51  
52

53 402  
54  
55  
56  
57  
58  
59  
60

1  
2 Pre-pregnancy BMI and early- and late-onset HELLP syndrome  
3  
4

5 403  
6  
7

8  
9 404  
10  
11  
12

13 405  
14  
15  
16

17 406  
18  
19  
20

21 407  
22  
23  
24

25 408  
26  
27  
28

29  
30 409 **References**  
31  
32

33 410 1. Burton GJ, Redman CW, Roberts JM, Moffett A. Pre-eclampsia: pathophysiology  
34  
35

36  
37 411 and clinical implications. *BMJ*. 2019 Jul 15;366:l2381.  
38  
39

40 412 2. Hutcheon JA, Lisonkova S, Joseph KS. Epidemiology of pre-eclampsia and the  
41  
42

43  
44 413 other hypertensive disorders of pregnancy. *Hypertens Dis Pregnancy*. 2011 Aug  
45  
46

47 414 1;25(4):391–403.  
48  
49  
50  
51  
52  
53  
54  
55  
56  
57  
58  
59  
60



## Pre-pregnancy BMI and early- and late-onset HELLP syndrome

- 1  
2  
3  
4  
5 415 3. Say L Dr, Chou D MD, Gemmill A MPH, Tunçalp Ö MD, Moller AB MSc, Daniels J  
6  
7  
8  
9 416 PhD, et al. Global causes of maternal death: a WHO systematic analysis. *Lancet*  
10  
11  
12 417 *Glob Health*. 2014;2(6):e323–33.
- 13  
14  
15 418 4. Valensise H, Vasapollo B, Gagliardi G, Novelli GP. Early and Late Preeclampsia.  
16  
17  
18  
19 419 Hypertension. 2008 Nov 1;52(5):873–80.
- 20  
21  
22 420 5. Wadhvani P, Saha PK, Kalra JK, Gainer S, Sundaram V. A study to compare  
23  
24  
25  
26 421 maternal and perinatal outcome in early vs. late onset preeclampsia. *Obstet*  
27  
28  
29  
30 422 *Gynecol Sci*. 2020 Apr 3;63(3):270–7.
- 31  
32  
33 423 6. Lisonkova S, Joseph KS. Incidence of preeclampsia: risk factors and outcomes  
34  
35  
36  
37 424 associated with early- versus late-onset disease. *Am J Obstet Gynecol*. 2013 Dec  
38  
39  
40 425 1;209(6):544.e1-544.e12.
- 41  
42  
43 426 7. Abildgaard U, Heimdal K. Pathogenesis of the syndrome of hemolysis, elevated liver  
44  
45  
46  
47 427 enzymes, and low platelet count (HELLP): a review. *Eur J Obstet Gynecol Reprod*  
48  
49  
50  
51 428 *Biol*. 2013 Feb 1;166(2):117–23.
- 52  
53  
54  
55  
56  
57  
58  
59  
60

1  
2 Pre-pregnancy BMI and early- and late-onset HELLP syndrome  
3  
4

- 5 429 8. Martin JN, Rinehart BK, May WL, Magann EF, Terrone DA, Blake PG. The spectrum  
6  
7  
8  
9 430 of severe preeclampsia: Comparative analysis by HELLP (hemolysis, elevated liver  
10  
11  
12 431 enzyme levels, and low platelet count) syndrome classification. *Am J Obstet*  
13  
14  
15 432 *Gynecol*. 1999 Jun 1;180(6):1373–84.  
16  
17  
18  
19 433 9. Malmström O, Morken NH. HELLP syndrome, risk factors in first and second  
20  
21  
22 434 pregnancy: a population-based cohort study. *Acta Obstet Gynecol Scand*. 2018 Jun  
23  
24  
25 435 1;97(6):709–16.  
26  
27  
28  
29 436 10. Karumanchi SA, Maynard SE, Stillman IE, Epstein FH, Sukhatme VP.  
30  
31  
32 437 Preeclampsia: a renal perspective. *Kidney Int*. 2005;67(6):2101–13.  
33  
34  
35  
36 438 11. Weinstein L. Classic Pages-Syndrome of hemolysis, elevated liver enzymes, and  
37  
38  
39 439 low platelet count: A severe consequence of hypertension in pregnancy. *Am J*  
40  
41  
42 440 *Obstet Gynecol*. 2005;193(3):859–859.  
43  
44  
45  
46 441 12. Leeners B, Rath W, Kuse S, Irawan C, Imthurn B, Neumaier-Wagner P. BMI: new  
47  
48  
49 442 aspects of a classical risk factor for hypertensive disorders in pregnancy. *Clin Sci*.  
50  
51  
52 443 2006 Jun 14;111(1):81–6.  
53  
54  
55  
56  
57  
58  
59  
60

1 Pre-pregnancy BMI and early- and late-onset HELLP syndrome

- 2  
3  
4  
5 444 13. Schummers L, Hutcheon JA, Bodnar LM, Lieberman E, Himes KP. Risk of adverse  
6  
7  
8  
9 445 pregnancy outcomes by prepregnancy body mass index: a population-based study  
10  
11  
12 446 to inform prepregnancy weight loss counseling. *Obstet Gynecol.* 2015  
13  
14  
15 447 Jan;125(1):133–43.  
16  
17  
18  
19 448 14. Bodnar LM, Catov JM, Klebanoff MA, Ness RB, Roberts JM. Prepregnancy Body  
20  
21  
22 449 Mass Index and the Occurrence of Severe Hypertensive Disorders of Pregnancy.  
23  
24  
25 450 *Epidemiology.* 2007;18(2).  
26  
27  
28  
29 451 15. Robillard PY, Dekker G, Scioscia M, Bonsante F, Iacobelli S, Boukerrou M, et al.  
30  
31  
32 452 Increased BMI has a linear association with late-onset preeclampsia: A population-  
33  
34  
35 453 based study. *PloS One.* 2019 Oct 17;14(10):e0223888–e0223888.  
36  
37  
38  
39 454 16. World Health Organization. Obesity and overweight [Internet].  
40  
41  
42 455 Home/Newsroom/Fact sheets/Detail/Obesity and overweight. Available from:  
43  
44  
45 456 <https://www.who.int/news-room/fact-sheets/detail/obesity-and-overweight>  
46  
47  
48  
49  
50  
51  
52  
53  
54  
55  
56  
57  
58  
59  
60

1 Pre-pregnancy BMI and early- and late-onset HELLP syndrome  
2  
3  
4

- 5 457 17. Guelinckx I, Devlieger R, Beckers K, Vansant G. Maternal obesity: pregnancy  
6  
7  
8 458 complications, gestational weight gain and nutrition. *Obes Rev.* 2008 Mar  
9  
10  
11  
12 459 1;9(2):140–50.  
13  
14  
15 460 18. Dzakpasu S, Fahey J, Kirby RS, Tough SC, Chalmers B, Heaman MI, et al.  
16  
17  
18  
19 461 Contribution of prepregnancy body mass index and gestational weight gain to  
20  
21  
22 462 caesarean birth in Canada. *BMC Pregnancy Childbirth.* 2014 Mar 18;14(1):106.  
23  
24  
25  
26 463 19. Driscoll AK, Gregory ECW. Increases in Prepregnancy Obesity: United States,  
27  
28  
29 464 2016–2019. 2020 Nov. (NCHS Data Brief). Report No.: No. 392.  
30  
31  
32  
33 465 20. Perinatal Services BC - Perinatal Data Registry [Internet]. Available from:  
34  
35  
36 466 <http://www.perinatalservicesbc.ca/health-professionals/data-surveillance/perinatal->  
37  
38  
39  
40 467 data-registry  
41  
42  
43 468 21. Frosst G, Hutcheon J, Joseph K, Kinniburgh B, Johnson C, Lee L. Validating the  
44  
45  
46  
47 469 British Columbia Perinatal Data Registry: a chart re-abstraction study. *BMC*  
48  
49  
50 470 *Pregnancy Childbirth.* 2015 May 27;15(1):123.  
51  
52  
53  
54  
55  
56  
57  
58  
59  
60

1 Pre-pregnancy BMI and early- and late-onset HELLP syndrome

- 2  
3  
4  
5 471 22. British Columbia Perinatal Data Registry Reference Manual Version 6.01 –  
6  
7  
8  
9 472 Addendum June 2017. Perinatal Services BC: Vancouver (BC);  
10  
11  
12 473 23. A healthy lifestyle - WHO recommendations [Internet]. World Health Organization.  
13  
14  
15 474 2010. Available from: [https://www.who.int/europe/news-room/fact-sheets/item/a-](https://www.who.int/europe/news-room/fact-sheets/item/a-healthy-lifestyle---who-recommendations)  
16  
17  
18  
19 475 [healthy-lifestyle---who-recommendations](https://www.who.int/europe/news-room/fact-sheets/item/a-healthy-lifestyle---who-recommendations)  
20  
21  
22 476 24. Lisonkova S, Bone JN, Muraca GM, Razaz N, Wang LQ, Sabr Y, et al. Incidence  
23  
24  
25  
26 477 and risk factors for severe preeclampsia, hemolysis, elevated liver enzymes, and  
27  
28  
29 478 low platelet count syndrome, and eclampsia at preterm and term gestation: a  
30  
31  
32  
33 479 population-based study. *Am J Obstet Gynecol*. 2021 Nov 1;225(5):538.e1-538.e19.  
34  
35  
36 480 25. SAS Institute Inc. The MI Procedure: PROC MI Statement [Internet]. Available from:  
37  
38  
39  
40 481 [https://documentation.sas.com/doc/en/statug/15.2/statug\\_mi\\_syntax01.htm](https://documentation.sas.com/doc/en/statug/15.2/statug_mi_syntax01.htm)  
41  
42  
43 482 26. Rubin DB, Rubin DB. Multiple imputation for nonresponse in surveys [Internet].  
44  
45  
46  
47 483 Hoboken: WILEY; 2009. Available from: <https://go.exlibris.link/fnXsLRMW>  
48  
49  
50  
51  
52  
53  
54  
55  
56  
57  
58  
59  
60

1 Pre-pregnancy BMI and early- and late-onset HELLP syndrome  
2  
3  
4

- 5 484 27. R Core Team (2022). R: A language and environment for statistical computing.  
6  
7  
8  
9 485 [Internet]. Foundation for Statistical Computing, Vienna, Austria.; Available from:  
10  
11  
12 486 <https://www.R-project.org/>  
13  
14  
15  
16 487 28. Martin JN, May WL, Rinehart BK, Martin RW, Magann EF. Increasing Maternal  
17  
18  
19 488 Weight: A Risk Factor for Preeclampsia/Eclampsia But Apparently Not for HELLP  
20  
21  
22  
23 489 Syndrome. *South Med J*. 2000;93:686–91.  
24  
25  
26 490 29. Fitzpatrick KE, Hinshaw K, Kurinczuk JJ, Knight M. Risk Factors, Management, and  
27  
28  
29  
30 491 Outcomes of Hemolysis, Elevated Liver Enzymes, and Low Platelets Syndrome and  
31  
32  
33 492 Elevated Liver Enzymes, Low Platelets Syndrome. *Obstet Gynecol* [Internet].  
34  
35  
36 493 2014;123(3). Available from:  
37  
38  
39  
40 494 [https://journals.lww.com/greenjournal/Fulltext/2014/03000/Risk\\_Factors,\\_Manageme](https://journals.lww.com/greenjournal/Fulltext/2014/03000/Risk_Factors,_Manageme)  
41  
42  
43 495 [nt,\\_and\\_Outcomes\\_of.19.aspx](https://journals.lww.com/greenjournal/Fulltext/2014/03000/Risk_Factors,_Management,_and_Outcomes_of.19.aspx)  
44  
45  
46  
47 496 30. Lisonkova S, Razaz N, Sabr Y, Muraca GM, Boutin A, Mayer C, et al. Maternal risk  
48  
49  
50  
51 497 factors and adverse birth outcomes associated with HELLP syndrome: a population-  
52  
53  
54 498 based study. *BJOG Int J Obstet Gynaecol*. 2020 Mar 19;n/a(n/a).  
55  
56  
57  
58  
59  
60

1 Pre-pregnancy BMI and early- and late-onset HELLP syndrome  
2  
3  
4

- 5 499 31. Sarkar M, Grab J, Dodge JL, Gunderson EP, Rubin J, Irani RA, et al. Non-alcoholic  
6  
7  
8 500 fatty liver disease in pregnancy is associated with adverse maternal and perinatal  
9  
10  
11  
12 501 outcomes. *J Hepatol.* 2020 Sep 1;73(3):516–22.  
13  
14  
15 502 32. Sibai BM, Ramadan MK, Usta I, Salama M, Mercer BM, Friedman SA. Maternal  
16  
17  
18  
19 503 morbidity and mortality in 442 pregnancies with hemolysis, elevated liver enzymes,  
20  
21  
22 504 and low platelets (HELLP syndrome). *Am J Obstet Gynecol.* 1993 Oct  
23  
24  
25  
26 505 1;169(4):1000–6.  
27  
28  
29 506 33. Chappell LC, Brocklehurst P, Green ME, Hunter R, Hardy P, Juszczak E, et al.  
30  
31  
32  
33 507 Planned early delivery or expectant management for late preterm pre-eclampsia  
34  
35  
36 508 (PHOENIX): a randomised controlled trial. *The Lancet.* 2019 Sep  
37  
38  
39  
40 509 28;394(10204):1181–90.  
41  
42  
43 510 34. Davies A, Wellard-Cole L, Rangan A, Allman-Farinelli M. Validity of self-reported  
44  
45  
46  
47 511 weight and height for BMI classification: A cross-sectional study among young  
48  
49  
50 512 adults. *Nutrition.* 2020 Mar 1;71:110622.  
51  
52  
53  
54  
55  
56  
57  
58  
59  
60

1 Pre-pregnancy BMI and early- and late-onset HELLP syndrome  
2  
3  
4

- 5 513 35. Fonseca H, Silva A, Matos M, Esteves I, Costa P, Guerra A, et al. Validity of BMI  
6  
7  
8 514 based on self-reported weight and height in adolescents. *Acta Paediatr*. 2010 Jan  
9  
10  
11  
12 515 1;99(1):83–8.  
13  
14  
15 516 36. Hodge JM, Shah R, McCullough ML, Gapstur SM, Patel AV. Validation of self-  
16  
17  
18  
19 517 reported height and weight in a large, nationwide cohort of U.S. adults. *PLOS ONE*.  
20  
21  
22 518 2020 Apr 13;15(4):e0231229.  
23  
24  
25  
26 519 37. Headen I, Cohen AK, Mujahid M, Abrams B. The accuracy of self-reported  
27  
28  
29  
30 520 pregnancy-related weight: a systematic review. *Obes Rev*. 2017 Mar 1;18(3):350–  
31  
32  
33 521 69.  
34  
35  
36 522  
37  
38  
39  
40 523  
41  
42  
43 524  
44  
45  
46  
47 525  
48  
49  
50 526  
51  
52  
53  
54 527  
55  
56  
57  
58  
59  
60



## Pre-pregnancy BMI and early- and late-onset HELLP syndrome

528 **Tables**529 **Table 1. Maternal demographic and clinical characteristics by pre-pregnancy body-**  
530 **mass-index; British Columbia, 2008/09-2019/20<sup>a</sup>**

|                                              | Underweight     | Normal BMI    | Overweight   | Obese        |
|----------------------------------------------|-----------------|---------------|--------------|--------------|
|                                              | n = 22,392      | n = 231,517   | n = 83,864   | n = 54,168   |
| Maternal age (years)                         |                 |               |              |              |
| < 25                                         | 4018 (17.9)     | 26332 (11.4)  | 9733 (11.6)  | 6947 (12.8)  |
| 25-34                                        | 14392<br>(64.3) | 146790 (63.4) | 52138 (62.2) | 33948 (62.7) |
| ≥ 35                                         | 3982 (17.8)     | 58395 (25.2)  | 21993 (26.2) | 13273 (24.5) |
| Nullipara                                    | 12551<br>(56.1) | 117740 (50.9) | 37202 (44.4) | 22020 (40.7) |
| Pre-existing diabetes                        | 26 (0.1)        | 693 (0.3)     | 672 (0.8)    | 1006 (1.9)   |
| Chronic hypertension                         | 23 (0.1)        | 717 (0.3)     | 727 (0.8)    | 1380 (2.6)   |
| Prior stillbirth /neonatal death             | 130 (0.6)       | 1894 (0.8)    | 979 (1.2)    | 791 (1.5)    |
| IVF conception <sup>b</sup>                  | 496 (2.2)       | 6835 (3.0)    | 2579 (3.1)   | 1639 (3.0)   |
| Multiple gestation                           |                 |               |              |              |
| Twins                                        | 253 (1.1)       | 3318 (1.4)    | 1340 (1.6)   | 895 (1.7)    |
| Triplets/Quadruplets <sup>d</sup>            | <5 (0)          | 34 (0)        | 26 (0)       | 19 (0)       |
| Bleeding < 20 weeks                          | 483 (2.2)       | 4116 (1.8)    | 1572 (1.9)   | 1166 (2.2)   |
| Antepartum bleeding/hemorrhage (≥ 20 weeks)  | 374 (1.7)       | 3352 (1.5)    | 1227 (1.5)   | 706 (1.3)    |
| Intrauterine Growth Restriction <sup>c</sup> | 987 (4.4)       | 5445 (2.4)    | 1472 (1.8)   | 953 (1.8)    |
| Gestational Hypertension                     | 547 (2.4)       | 8551 (3.7)    | 5694 (6.8)   | 6332 (11.7)  |
| Gestational Diabetes                         | 1680 (7.5)      | 19492 (8.4)   | 11548 (13.8) | 11452 (21.1) |

## Pre-pregnancy BMI and early- and late-onset HELLP syndrome

|                             |                 |               |              |              |
|-----------------------------|-----------------|---------------|--------------|--------------|
| Proteinuria                 | 161 (0.7)       | 2236 (1.0)    | 1267 (1.5)   | 1337 (2.5)   |
| Alcohol use                 | 192 (0.9)       | 2240 (1.0)    | 944 (1.1)    | 786 (1.5)    |
| Substance use               | 1118 (5.0)      | 8099 (3.5)    | 3514 (4.2)   | 2970 (5.5)   |
| Smoking                     | 1727 (7.7)      | 12943 (5.6)   | 6155 (7.3)   | 5576 (10.3)  |
| Gestational age at delivery |                 |               |              |              |
| (weeks)                     |                 |               |              |              |
| 20-27                       | 102 (0.5)       | 881 (0.4)     | 393 (0.5)    | 358 (0.7)    |
| 28-33                       | 387 (1.7)       | 3423 (1.5)    | 1473 (1.8)   | 1158 (2.1)   |
| 34-36                       | 1620 (7.2)      | 15119 (6.5)   | 6142 (7.3)   | 4680 (8.6)   |
| 37-41                       | 20076<br>(89.7) | 209831 (90.6) | 75017 (89.5) | 47448 (87.6) |
| ≥ 42                        | 207 (0.9)       | 2263 (1.0)    | 839 (1.0)    | 524 (1.0)    |

531 <sup>a</sup>Data shown as n(%)

532 <sup>b</sup>IVF = in vitro fertilization

533 <sup>c</sup>Ultrasound diagnosed intra-uterine growth restriction (IUGR)

534 <sup>d</sup>Information on cell numbers <5 was suppressed due to confidentiality reasons.

535 **Table 2. Rates of early-onset and late-onset HELLP syndrome per 1000 ongoing**  
 536 **pregnancies by maternal demographic and clinical characteristics; British Columbia,**  
 537 **2008/09-2019/20**

|                            | Early-onset<br>HELLP<br>syndrome | Late-onset<br>HELLP<br>syndrome | Overall   |
|----------------------------|----------------------------------|---------------------------------|-----------|
| Pre-pregnancy BMI category |                                  |                                 |           |
| Underweight                | 8 (0.4)                          | 35 (1.6)                        | 43 (1.9)  |
| Normal weight              | 125 (0.5)                        | 462 (2.0)                       | 587 (2.5) |
| Overweight                 | 73 (0.9)                         | 199 (2.4)                       | 272 (3.2) |
| Obese                      | 69 (1.3)                         | 145 (2.8)                       | 214 (4.0) |
| Maternal age (years)       |                                  |                                 |           |
| < 25                       | 30 (0.6)                         | 97 (2.1)                        | 127 (2.7) |

## Pre-pregnancy BMI and early- and late-onset HELLP syndrome

|                                               |           |            |            |
|-----------------------------------------------|-----------|------------|------------|
| 25-34                                         | 158 (0.6) | 512 (2.1)  | 670 (2.7)  |
| ≥ 35                                          | 87 (0.9)  | 232 (2.4)  | 319 (3.3)  |
| Nullipara                                     | 188 (1.0) | 629 (3.4)  | 817 (4.3)  |
| Pre-existing diabetes                         | 6 (2.5)   | 14 (6.3)   | 20 (8.3)   |
| Chronic hypertension                          | 19 (6.7)  | 20 (7.7)   | 39 (13.7)  |
| Prior stillbirth /neonatal death <sup>a</sup> | <5 (<1.0) | <5 (<1.0)  | 5 (1.3)    |
| IVF conception <sup>b</sup>                   | 19 (1.6)  | 73 (6.7)   | 92 (8.0)   |
| Multiple gestation                            | 33 (5.6)  | 91 (19.3)  | 124 (21.1) |
| Bleeding (< 20 weeks)                         | 12 (1.6)  | 10 (1.5)   | 22 (3.0)   |
| Antepartum Bleeding/hemorrhage (≥ 20 weeks)   | 15 (2.7)  | 12 (2.5)   | 27 (4.8)   |
| Alcohol use <sup>a</sup>                      | <5 (<1.0) | <11 (<2.7) | 12 (2.9)   |
| Substance use                                 | 14 (0.9)  | 25 (1.6)   | 39 (2.5)   |
| Smoking                                       | 14 (0.5)  | 36 (1.4)   | 50 (1.9)   |

538 <sup>a</sup>Information on cell numbers <5 was suppressed due to confidentiality reasons. Other  
 539 numbers were suppressed if needed to avoid back-calculation from the total

540 <sup>b</sup>IVF = in vitro fertilization

541

## Pre-pregnancy BMI and early- and late-onset HELLP syndrome

542 **Table 3. Adjusted hazard ratios for early-onset and late-onset HELLP syndrome with**  
 543 **95% confidence intervals; British Columbia, 2008/09-2019/20**

|                                                   | Overall<br>AHR (95% CI) <sup>a</sup> | Early-onset<br>HELLP<br>AHR (95% CI) | Late-onset HELLP<br>AHR (95% CI) | P-<br>value <sup>b</sup> |
|---------------------------------------------------|--------------------------------------|--------------------------------------|----------------------------------|--------------------------|
| <b>Pre-pregnancy BMI category</b>                 |                                      |                                      |                                  |                          |
| Underweight                                       | 0.79 (0.58-1.07)                     | 0.67 (0.33-1.38)                     | 0.82 (0.58-1.16)                 | 0.628                    |
| Normal weight                                     | Ref                                  | Ref                                  | Ref                              | Ref                      |
| Overweight                                        | 1.34 (1.16-1.55)                     | 1.63 (1.22-2.18)                     | 1.26 (1.07-1.49)                 | 0.129                    |
| Obese                                             | 1.65 (1.41-1.94)                     | 2.24 (1.65-3.04)                     | 1.48 (1.23-1.80)                 | 0.025                    |
| <b>Maternal age (years)</b>                       |                                      |                                      |                                  |                          |
| < 25                                              | 0.92 (0.76-1.12)                     | 0.92 (0.62-1.38)                     | 0.92 (0.74-1.15)                 | 0.998                    |
| 25-34                                             | Ref                                  | Ref                                  | Ref                              | Ref                      |
| ≥ 35                                              | 1.27 (1.11-1.47)                     | 1.39 (1.06-1.83)                     | 1.23 (1.05-1.45)                 | 0.445                    |
| Nullipara                                         | 2.93 (2.56-3.36)                     | 2.56 (1.97-3.33)                     | 3.09 (2.63-3.63)                 | 0.229                    |
| Pre-existing diabetes                             | 2.40 (1.51-3.80)                     | 1.64 (0.71-3.81)                     | 2.88 (1.66-5.00)                 | 0.273                    |
| Chronic hypertension                              | 3.93 (2.80-5.51)                     | 5.95 (3.62-9.79)                     | 2.92 (1.83-4.66)                 | 0.041                    |
| Prior stillbirth/neonatal death <sup>c</sup>      | 0.88 (0.36-2.13)                     | N/A                                  | N/A                              | N/A                      |
| IVF conception <sup>d</sup>                       | 1.21 (0.95-1.55)                     | 0.83 (0.50-1.41)                     | 1.37 (1.04-1.80)                 | 0.101                    |
| Multiple gestation                                | 13.66 (11.06-<br>16.87)              | 8.31 (5.59-<br>12.35)                | 17.81 (13.89-<br>22.83)          | 0.001                    |
| Bleeding at < 20 weeks                            | 0.95 (0.62-1.45)                     | 1.89 (1.05-3.39)                     | 0.60 (0.32-1.12)                 | 0.008                    |
| Antepartum bleeding or<br>hemorrhage (≥ 20 weeks) | 2.10 (1.43-3.08)                     | 3.75 (2.22-6.35)                     | 1.37 (0.77-2.43)                 | 0.011                    |
| Alcohol use <sup>e</sup>                          | 1.07 (0.60-1.90)                     | N/A                                  | N/A                              | N/A                      |
| Substance use                                     | 0.98 (0.70-1.36)                     | 1.38 (0.78-2.42)                     | 0.84 (0.56-1.27)                 | 0.166                    |
| Smoking                                           | 0.71 (0.53-0.96)                     | 0.70 (0.40-1.23)                     | 0.71 (0.50-1.01)                 | 0.963                    |

544 <sup>a</sup>AHR = adjusted hazard ratio, with 95% confidence interval in parentheses, unless otherwise  
 545 specified

1  
2 Pre-pregnancy BMI and early- and late-onset HELLP syndrome  
3  
4

5 546 <sup>b</sup>p-value for interaction with early- vs late-onset HELLP syndrome.

6  
7 547 <sup>c</sup>N/A = not applicable. We did not examine differences by early- vs late-onset for prior  
8 548 stillbirth/neonatal death or alcohol use due to small sample size.

9  
10 549 <sup>d</sup>IVF = in vitro fertilization  
11  
12 550  
13  
14

15 551

16  
17  
18 552  
19  
20  
21

22 553  
23  
24

25 554  
26  
27

28  
29 555 **Figure legend**  
30  
31

32 556  
33  
34

35  
36 557 **Figure 1.** Gestational-age specific rates of HELLP syndrome for each BMI category

37  
38  
39 558 (Panel A); and log-transformed rates (Panel B). Rates from 40 to 45 weeks were

40  
41  
42  
43 559 combined. Splines with 95% confidence intervals were fitted by the generalized additive

44  
45  
46 560 model (“gam”) smoothing method.  
47  
48

49 561  
50  
51

52  
53 562 **Supplemental Figure 1.** Flowchart of study sample selection.  
54  
55  
56  
57  
58  
59  
60

## Pre-pregnancy BMI and early- and late-onset HELLP syndrome

563

564

565

566

567

568

569

570

571

572

573

574

575

576

577

1 Pre-pregnancy BMI and early- and late-onset HELLP syndrome

2  
3  
4  
5 578 **Supplementary tables**

6  
7  
8  
9 579 **Supplemental Table 1. Definitions and sources of variables**

|                         | Definition                                                                                                                                                                   | Source          |
|-------------------------|------------------------------------------------------------------------------------------------------------------------------------------------------------------------------|-----------------|
| Maternal age<br>(years) | Mother's age (in years) calculated at date of delivery.                                                                                                                      | BCPDR           |
| Nullipara               | Mother has never delivered a baby of at least 500 grams birth weight or at least 20 weeks gestation in a previous pregnancy.                                                 | BCPDR           |
| Pre-existing diabetes   | Pre-existing diabetes mellitus Type 1 or Type 2, insulin used;<br>Pre-existing diabetes mellitus Type 1 or Type 2, insulin not used;<br>or 'E10','E11', 'O245','O246','O247' | BCPDR<br>ICD-10 |

1 Pre-pregnancy BMI and early- and late-onset HELLP syndrome

2

3

4

---

5 Chronic

6 'O10','O11'

7 ICD-10

8 hypertension

9

---

10

11

12 Mother had at least one prior live born infant, who died

13

14

15

16 Prior stillbirth within the first 28 days of life.

17

18 BCPDR

19 /neonatal death Mother had at least one prior stillbirth or intrauterine

20

21

22 death documented.

---

23

24

25

26

27 IVF conception Mother had in-vitro fertilization to achieve the current

28

29 pregnancy.

30 BCPDR

---

31

32

33

34 The incremental sequence number of babies born from

35

36

37 the current pregnancy. Should be used with

38

39 Multiple gestation multiple\_birth\_count. Along with mother\_id, required to

40

41

42 link to MULTIPLE\_LABOURS.

43

44

45

---

46

47 Antepartum

48

49

50

51 bleeding

52

53

54

55

56

57

58

59

60



1 Pre-pregnancy BMI and early- and late-onset HELLP syndrome

2  
3  
4  
5  
6  
7 < 20 weeks  
8  
9  
10  
11  
12  
13  
14  
15  
16  
17  
18  
19  
20  
21  
22  
23  
24  
25  
26  
27  
28  
29  
30  
31  
32  
33  
34  
35  
36  
37  
38  
39  
40  
41  
42  
43  
44  
45  
46  
47  
48  
49  
50  
51  
52  
53  
54  
55  
56  
57  
58  
59  
60

Mother had any antepartum bleeding in pregnancy < 20 weeks gestation.

BCPDR

---

Antepartum

Mother had any antepartum hemorrhage or bleeding in bleeding or hemorrhage  $\geq$  20 weeks weeks

Mother had any antepartum hemorrhage or bleeding in pregnancy  $\geq$  20 weeks gestation, including bleeding from BCPDR cervical polyps.

BCPDR

---

Intrauterine Growth

Health care provider identified intrauterine growth restriction (IUGR) during the antenatal period. Baby may Restriction<sup>a</sup> or may not be appropriately grown at birth.

BCPDR

---

Gestational Hypertension

Care provider diagnosed mother with gestational hypertension during the current pregnancy.

BCPDR

---

Gestational Diabetes

Gestational diabetes, insulin dependent.

BCPDR

Gestational Diabetes

Gestational diabetes, non-insulin dependent.

---

1  
2 Pre-pregnancy BMI and early- and late-onset HELLP syndrome  
3  
4

---

5  
6 Proteinuria Care provider diagnosed proteinuria (>+1g/L) during the  
7 BCPDR  
8 current pregnancy.  
9

---

10  
11  
12 Alcohol use Care provider lists mother's use of alcohol as a risk  
13 BCPDR  
14 factor in this pregnancy.  
15  
16

---

17  
18  
19 Substance use Mother used any of the following substances at any time  
20 during the current pregnancy: heroin/opioids, cocaine,  
21  
22  
23 methadone, solvents, or marijuana; OR care provider BCPDR  
24  
25  
26 lists use of prescription, 'other', or unknown other drug  
27  
28  
29 as a risk to the pregnancy.  
30  
31  
32  
33  
34  
35

---

36  
37 Smoking Mother smoked tobacco products during pregnancy. BCPDR  
38  
39

---

40  
41 Gestational age at Algorithm-based estimate of gestational age at delivery.  
42  
43  
44 Uses last menstrual period, first ultrasound (<20 weeks),  
45 BCPDR  
46  
47 clinical estimate from newborn exam, and documentation  
48  
49  
50  
51 from maternal chart.  
52  
53

---

54  
55  
56  
57  
58  
59  
60

1 Pre-pregnancy BMI and early- and late-onset HELLP syndrome  
2  
3  
4

---

5 Mother was diagnosed with HELLP Syndrome (H-

6  
7  
8  
9 HELLP syndrome hemolysis, EL-elevated liver enzymes, LP-low platelet BCPDR  
10  
11  
12 count)  
13  
14

---

15  
16 580 <sup>a</sup>Ultrasound diagnosed intra-uterine growth restriction (IUGR)

17  
18  
19 581  
20  
21  
22  
23  
24  
25  
26  
27  
28  
29  
30  
31  
32  
33  
34  
35  
36  
37  
38  
39  
40  
41  
42  
43  
44  
45  
46  
47  
48  
49  
50  
51  
52  
53  
54  
55  
56  
57  
58  
59  
60

Pre-pregnancy BMI and early- and late-onset HELLP syndrome

582 **Supplemental Table 2. Rates of HELLP syndrome by Body-Mass-Index category and**  
 583 **hazard ratios with 95% confidence intervals**

|                                          | Underweight      | Normal BMI | Overweight       | Obese            |
|------------------------------------------|------------------|------------|------------------|------------------|
| <i>All pregnancies</i>                   |                  |            |                  |                  |
| N cases (rate per thousand) <sup>a</sup> | 43 (1.9)         | 587 (2.5)  | 272 (3.2)        | 214 (4.0)        |
| Crude HR <sup>b</sup>                    | 0.78 (0.57-1.06) | Ref        | 1.29 (1.12-1.49) | 1.62 (1.39-1.90) |
| <i>Early-onset HELLP (&lt; 34 wks)</i>   |                  |            |                  |                  |
| N cases (rate per thousand) <sup>a</sup> | 8 (0.4)          | 125 (0.5)  | 73 (0.9)         | 69 (1.3)         |
| Crude HR <sup>b</sup>                    | 0.66 (0.32-1.35) | Ref        | 1.62 (1.21-2.16) | 2.37 (1.77-3.18) |

## Pre-pregnancy BMI and early- and late-onset HELLP syndrome

*Late-onset HELLP ( $\geq 34$* *wks)*

N cases (rate per

35 (1.6) 462 (2.0) 199 (2.4) 145 (2.8)

thousand)<sup>a</sup>

0.81 (0.57-

Crude HR<sup>b</sup>

Ref

1.14) 1.21 (1.02-

1.42) 1.42 (1.17-

584 <sup>a</sup>Rates are per 1000 ongoing pregnancies at 20 weeks (early-onset HELLP) and at 34

585 weeks gestation (late-onset HELLP).

586 <sup>b</sup>HR = hazard ratio, with 95% confidence interval in parentheses, unless otherwise

587 specified

588

Pre-pregnancy BMI and early- and late-onset HELLP syndrome

589 **Supplemental Table 3. Maternal demographic and clinical characteristics by early- vs**  
 590 **late-onset HELLP syndrome; British Columbia, 2008/09-2019/20<sup>a</sup>**

|                                   | Early-onset | Late-onset |
|-----------------------------------|-------------|------------|
|                                   | HELLP       | HELLP      |
|                                   | n =275      | n = 841    |
| <b>Pre-pregnancy BMI category</b> |             |            |
| Underweight                       | 8 (2.9)     | 35 (4.2)   |
| Normal weight                     | 125 (45.5)  | 462 (54.9) |
| Overweight                        | 73 (26.6)   | 199 (23.7) |
| Obese                             | 69 (25.1)   | 145 (17.2) |
| <b>Maternal age (years)</b>       |             |            |
| < 25                              | 30 (10.9)   | 97 (11.5)  |
| 25-34                             | 158 (57.5)  | 512 (60.9) |
| ≥ 35                              | 87 (31.6)   | 232 (27.6) |

1 Pre-pregnancy BMI and early- and late-onset HELLP syndrome

2

3

4

5 Nullipara 188 (68.4) 629 (74.8)

6

7

8

9 Chronic diabetes 6 (2.2) 14 (1.7)

10

11

12 Chronic hypertension 19 (6.9) 20 (2.4)

13

14

15

16 Prior stillbirth /neonatal death<sup>b</sup> <5 (<1.8) <5 (<0.5)

17

18

19 IVF conception<sup>c</sup> 19 (6.9) 73 (8.7)

20

21

22

23 Multiple gestation 33 (12.0) 91 (10.8)

24

25

26 Bleeding (< 20 weeks) 12 (4.4) 10 (1.2)

27

28

29

30 Antepartum bleeding/hemorrhage

31

32 15 (5.5) 12 (1.4)

33

34 (≥ 20 weeks)

35

36

37 Alcohol use<sup>b</sup> <5 (<1.8) 10 (1.2)

38

39

40 Substance use 14 (5.1) 25 (3.0)

41

42

43

44 Smoking 14 (5.1) 36 (4.3)

45

46

47

48 591 <sup>a</sup>Data shown as n(%)

49

50

51 592 <sup>b</sup>Information on cell numbers <5 was suppressed due to confidentiality reasons.

52

53

54

55 593 <sup>c</sup>IVF = in vitro fertilization

56

57

58

59

60

1 Pre-pregnancy BMI and early- and late-onset HELLP syndrome  
2  
3  
4

5 594  
6  
7

8 595  
9  
10

11 596  
12  
13

14 597  
15  
16  
17  
18  
19  
20  
21  
22  
23  
24  
25  
26  
27  
28  
29  
30  
31  
32  
33  
34  
35  
36  
37  
38  
39  
40  
41  
42  
43  
44  
45  
46  
47  
48  
49  
50  
51  
52  
53  
54  
55  
56  
57  
58  
59  
60

For peer review only



## Pre-pregnancy BMI and early- and late-onset HELLP syndrome

598 **Supplemental Table 4. Cases of HELLP syndrome at each gestational age (rate per**  
 599 **1000 ongoing pregnancies)<sup>a</sup>**

| Gestational age<br>(weeks) | Underweight<br>n = 22,392 | Normal BMI<br>n = 231,517 | Overweight<br>n = 83,864 | Obese<br>n = 54,168 |
|----------------------------|---------------------------|---------------------------|--------------------------|---------------------|
|                            | <5/22392                  | <5/231517                 | <5/83864                 | <5/54168            |
| 20-21                      | (<0.22)                   | (<0.02)                   | (<0.06)                  | (<0.09)             |
|                            | <5/22379                  | <5/231351                 | <5/83796                 | <5/54108            |
| 22-23                      | (<0.22)                   | (<0.02)                   | (<0.06)                  | (<0.09)             |
|                            | <5/22356                  |                           | <5/83720                 |                     |
| 24-25                      | (<0.22)                   | 6/231174 (0.03)           | (<0.06)                  | 5/54023 (0.09)      |
|                            | <5/22332                  |                           |                          |                     |
| 26-27                      | (<0.22)                   | 14/230958 (0.06)          | 8/83609 (0.10)           | 6/53926 (0.11)      |
| 28-29                      | <5/22289 (0.04)           | 16/230635 (0.07)          | 14/83471 (0.17)          | 6/53810 (0.11)      |
| 30-31                      | <5/22232 (0.13)           | 22/230136 (0.10)          | 18/83269 (0.22)          | 23/53631 (0.43)     |

## Pre-pregnancy BMI and early- and late-onset HELLP syndrome

|       |                 |                  |                 |                 |
|-------|-----------------|------------------|-----------------|-----------------|
| 32-33 | <5/22133 (0.14) | 66/229249 (0.29) | 29/82870 (0.35) | 27/53303 (0.51) |
|       |                 | 116/227212       |                 |                 |
| 34-35 | 10/21902 (0.46) |                  | 58/81998 (0.71) | 42/52652 (0.80) |
|       | (0.51)          |                  |                 |                 |
|       |                 | 154/221075       |                 |                 |
| 36-37 | 13/21247 (0.61) |                  | 70/79515 (0.88) | 55/50825 (1.08) |
|       | (0.70)          |                  |                 |                 |
|       |                 | 131/189757       |                 |                 |
| 38-39 | 11/17845 (0.62) |                  | 56/66951 (0.84) | 36/40911 (0.88) |
|       | (0.69)          |                  |                 |                 |
| ≥ 40  | <5/6278 (<0.80) | 61/73662 (0.83)  | 15/26327 (0.57) | 12/15135 (0.79) |

---

<sup>a</sup>Information on cell numbers <5 was suppressed due to confidentiality reasons.

600

601

1 Pre-pregnancy BMI and early- and late-onset HELLP syndrome  
 2  
 3  
 4

5 602 **Supplemental Table 5. Demographic and clinical characteristics of women missing pre-**  
 6

7  
 8 603 **pregnancy BMI, live births and stillbirths, British Columbia, 200/09-2019/20<sup>a</sup>**  
 9

|    | BMI not missing                  | BMI missing                |
|----|----------------------------------|----------------------------|
|    | n = 391,941                      | n = 132,536                |
| 11 | <hr/>                            |                            |
| 12 |                                  |                            |
| 13 |                                  |                            |
| 14 |                                  |                            |
| 15 |                                  |                            |
| 16 |                                  |                            |
| 17 |                                  |                            |
| 18 |                                  |                            |
| 19 |                                  |                            |
| 20 | Maternal age (years)             |                            |
| 21 |                                  |                            |
| 22 |                                  |                            |
| 23 | < 25                             | 47030 (12.0) 20134 (15.2)  |
| 24 |                                  |                            |
| 25 |                                  |                            |
| 26 | 25-34                            | 247268 (63.1) 78660 (59.4) |
| 27 |                                  |                            |
| 28 |                                  |                            |
| 29 |                                  |                            |
| 30 | ≥ 35                             | 97643 (24.9) 33742 (25.5)  |
| 31 |                                  |                            |
| 32 |                                  |                            |
| 33 |                                  |                            |
| 34 | Nullipara                        | 189513 (48.4) 53789 (40.6) |
| 35 |                                  |                            |
| 36 |                                  |                            |
| 37 | Pre-existing diabetes            | 2397 (0.6) 913 (0.7)       |
| 38 |                                  |                            |
| 39 |                                  |                            |
| 40 | Chronic hypertension             | 2847 (0.7) 890 (0.7)       |
| 41 |                                  |                            |
| 42 |                                  |                            |
| 43 |                                  |                            |
| 44 | Prior stillbirth /neonatal death | 3794 (1.0) 1734 (1.3)      |
| 45 |                                  |                            |
| 46 |                                  |                            |
| 47 | IVF conception <sup>b</sup>      | 11549 (3.0) 3877 (2.9)     |
| 48 |                                  |                            |
| 49 |                                  |                            |
| 50 |                                  |                            |
| 51 | Multiple gestation               |                            |
| 52 |                                  |                            |
| 53 |                                  |                            |
| 54 |                                  |                            |
| 55 |                                  |                            |
| 56 |                                  |                            |
| 57 |                                  |                            |
| 58 |                                  |                            |
| 59 |                                  |                            |
| 60 |                                  |                            |

1  
2 Pre-pregnancy BMI and early- and late-onset HELLP syndrome  
3  
4

|                                                 |              |              |
|-------------------------------------------------|--------------|--------------|
| 5 Twins                                         | 5806 (1.5)   | 2478 (1.9)   |
| 6                                               |              |              |
| 7                                               |              |              |
| 8 Triplets/Quadruplets                          | 82 (0)       | 27 (0)       |
| 9                                               |              |              |
| 10                                              |              |              |
| 11                                              |              |              |
| 12 Antepartum bleeding/hemorrhage               |              |              |
| 13                                              |              |              |
| 14                                              |              |              |
| 15                                              |              |              |
| 16 < 20 weeks                                   | 7337 (1.9)   | 1813 (1.4)   |
| 17                                              |              |              |
| 18                                              |              |              |
| 19 ≥ 20 weeks                                   | 5659 (1.4)   | 1496 (1.1)   |
| 20                                              |              |              |
| 21                                              |              |              |
| 22                                              |              |              |
| 23 Intrauterine Growth Restriction <sup>c</sup> | 8857 (2.3)   | 2471 (1.9)   |
| 24                                              |              |              |
| 25                                              |              |              |
| 26 Gestational Hypertension                     | 21124 (5.4)  | 6623 (5.0)   |
| 27                                              |              |              |
| 28                                              |              |              |
| 29                                              |              |              |
| 30 Gestational Diabetes                         | 44172 (11.3) | 13248 (10.0) |
| 31                                              |              |              |
| 32                                              |              |              |
| 33 Proteinuria                                  | 21124 (5.4)  | 6623 (5.0)   |
| 34                                              |              |              |
| 35                                              |              |              |
| 36                                              |              |              |
| 37 Alcohol use                                  | 4162 (1.1)   | 1845 (1.4)   |
| 38                                              |              |              |
| 39                                              |              |              |
| 40 Substance use                                | 15701 (4.0)  | 6758 (5.1)   |
| 41                                              |              |              |
| 42                                              |              |              |
| 43                                              |              |              |
| 44 Smoking                                      | 26401 (6.7)  | 10435 (7.9)  |
| 45                                              |              |              |
| 46                                              |              |              |
| 47                                              |              |              |
| 48 Second-hand smoke                            | 26319 (6.7)  | 7565 (5.7)   |
| 49                                              |              |              |
| 50                                              |              |              |

51  
52 <sup>a</sup>Data shown as n(%)  
53  
54  
55  
56  
57  
58  
59

1 Pre-pregnancy BMI and early- and late-onset HELLP syndrome  
2  
3  
4

---

5 <sup>b</sup>IVF = in vitro fertilization  
6  
7

8  
9 <sup>c</sup>Ultrasound diagnosed intra-uterine growth restriction (IUGR)  
10  
11

12 604  
13  
14

15  
16 605  
17  
18  
19  
20  
21  
22  
23  
24  
25  
26  
27  
28  
29  
30  
31  
32  
33  
34  
35  
36  
37  
38  
39  
40  
41  
42  
43  
44  
45  
46  
47  
48  
49  
50  
51  
52  
53  
54  
55  
56  
57  
58  
59  
60

For peer review only

## Pre-pregnancy BMI and early- and late-onset HELLP syndrome

606 **Supplemental Table 6. Hazard Ratios and 95% confidence intervals using imputed data**  
 607 **for missing values of BMI**

|                                          | Underweight      | Normal BMI | Overweight       | Obese            |
|------------------------------------------|------------------|------------|------------------|------------------|
| <b>Early-onset HELLP (&lt; 34 wks)</b>   |                  |            |                  |                  |
| N cases (rate per thousand) <sup>a</sup> | 8 (0.4)          | 164 (0.5)  | 137 (0.9)        | 71 (1.3)         |
| Adjusted HR <sup>b</sup>                 | 0.76 (0.43-1.33) | Ref        | 1.54 (1.19-2.00) | 2.06 (1.53-2.78) |
| <b>Late-onset HELLP (≥ 34 wks)</b>       |                  |            |                  |                  |
| N cases (rate per thousand) <sup>a</sup> | 35 (1.6)         | 572 (1.9)  | 376 (2.6)        | 148 (2.8)        |

## Pre-pregnancy BMI and early- and late-onset HELLP syndrome

|                          |                     |             |                  |
|--------------------------|---------------------|-------------|------------------|
|                          |                     | 1.24 (0.92- |                  |
|                          | 0.96 (0.51-1.8) Ref |             | 1.46 (1.03-2.08) |
| Adjusted HR <sup>b</sup> |                     | 1.66)       |                  |

<sup>a</sup>Rates are per 1000 ongoing pregnancies at 20 weeks (early-onset HELLP syndrome) and at 34 weeks gestation (late-onset HELLP syndrome).

<sup>b</sup>HR = hazard ratio, with 95% confidence interval in parentheses, unless otherwise specified.

Adjusted for nulliparity, maternal age, chronic diabetes, chronic hypertension, in vitro

fertilization, antepartum bleeding/hemorrhage, gestational diabetes, alcohol, substance use,

smoking during pregnancy, prior pregnancy outcomes, and multiple gestation.

608

609

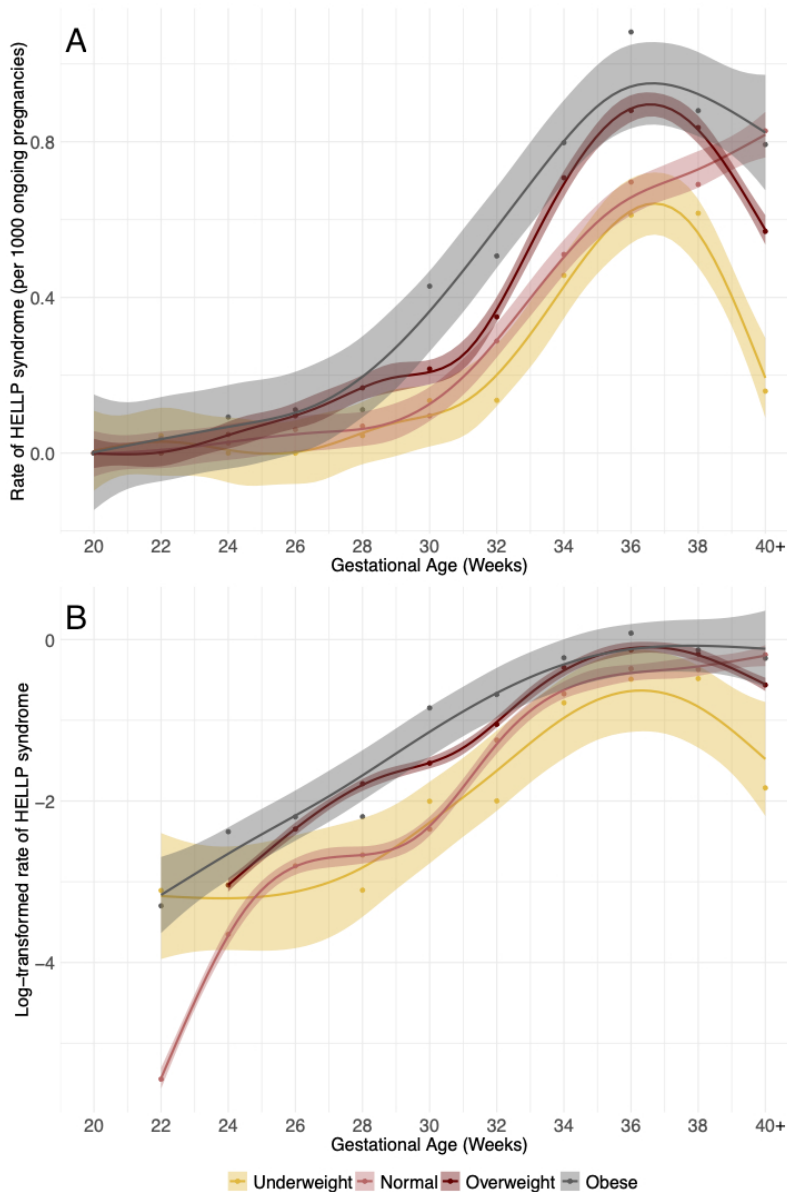

Figure 1. Gestational-age specific rates of HELLP syndrome for each BMI category (Panel A); and log-transformed rates (Panel B). Rates from 40 to 45 weeks were combined. Splines with 95% confidence intervals were fitted by the generalized additive model ("gam") smoothing method.

254x381mm (72 x 72 DPI)



1  
2  
3  
4  
5  
6  
7  
8  
9  
10  
11  
12  
13  
14  
15  
16  
17  
18  
19  
20  
21  
22  
23  
24  
25  
26  
27  
28  
29  
30  
31  
32  
33  
34  
35  
36  
37  
38  
39  
40  
41  
42  
43  
44  
45  
46  
47  
48  
49  
50  
51  
52  
53  
54  
55  
56  
57  
58  
59  
60

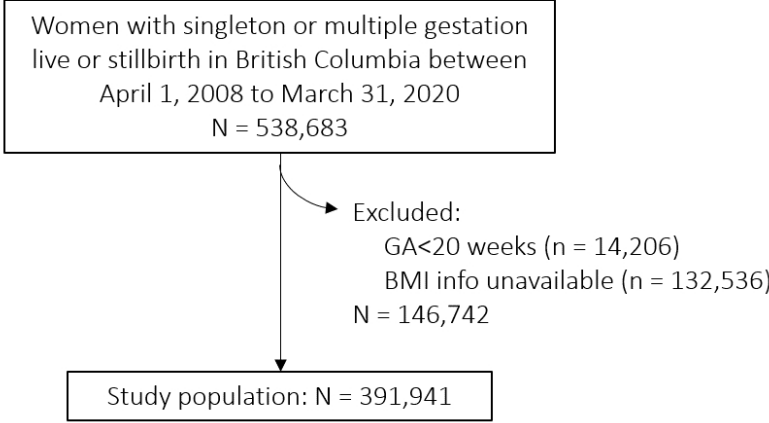

Supplemental Figure 1. Flowchart of study sample selection.

443x288mm (59 x 59 DPI)

## STROBE Statement—checklist of items that should be included in reports of observational studies

|                           | Item No. | Recommendation                                                                                                                                                                                                                                                                                                                                                                                                                                                         | Page No.   | Relevant text from manuscript                                                                                                                                                                                 |
|---------------------------|----------|------------------------------------------------------------------------------------------------------------------------------------------------------------------------------------------------------------------------------------------------------------------------------------------------------------------------------------------------------------------------------------------------------------------------------------------------------------------------|------------|---------------------------------------------------------------------------------------------------------------------------------------------------------------------------------------------------------------|
| <b>Title and abstract</b> | 1        | (a) Indicate the study's design with a commonly used term in the title or the abstract                                                                                                                                                                                                                                                                                                                                                                                 | Title page | "Title: Pre-pregnancy body mass index and other risk factors for early- and late-onset hemolysis, elevated liver enzymes, and low platelets (HELLP) syndrome: A population-based retrospective cohort study." |
|                           |          | (b) Provide in the abstract an informative and balanced summary of what was done and what was found                                                                                                                                                                                                                                                                                                                                                                    | 2-3        |                                                                                                                                                                                                               |
| <b>Introduction</b>       |          |                                                                                                                                                                                                                                                                                                                                                                                                                                                                        |            |                                                                                                                                                                                                               |
| Background/rationale      | 2        | Explain the scientific background and rationale for the investigation being reported                                                                                                                                                                                                                                                                                                                                                                                   | 4-5        | Lines 67-84                                                                                                                                                                                                   |
| Objectives                | 3        | State specific objectives, including any prespecified hypotheses                                                                                                                                                                                                                                                                                                                                                                                                       | 4-5        | Lines 85-90                                                                                                                                                                                                   |
| <b>Methods</b>            |          |                                                                                                                                                                                                                                                                                                                                                                                                                                                                        |            |                                                                                                                                                                                                               |
| Study design              | 4        | Present key elements of study design early in the paper                                                                                                                                                                                                                                                                                                                                                                                                                | 5-6        | Lines 92-122                                                                                                                                                                                                  |
| Setting                   | 5        | Describe the setting, locations, and relevant dates, including periods of recruitment, exposure, follow-up, and data collection                                                                                                                                                                                                                                                                                                                                        | 5-6        | Lines 92-122                                                                                                                                                                                                  |
| Participants              | 6        | (a) <i>Cohort study</i> —Give the eligibility criteria, and the sources and methods of selection of participants. Describe methods of follow-up<br><i>Case-control study</i> —Give the eligibility criteria, and the sources and methods of case ascertainment and control selection. Give the rationale for the choice of cases and controls<br><i>Cross-sectional study</i> —Give the eligibility criteria, and the sources and methods of selection of participants | 5-6        | Lines 92-122                                                                                                                                                                                                  |
|                           |          | (b) <i>Cohort study</i> —For matched studies, give matching criteria and number of exposed and unexposed<br><i>Case-control study</i> —For matched studies, give matching criteria and the number of controls per case                                                                                                                                                                                                                                                 | N/A        | N/A                                                                                                                                                                                                           |

1  
2  
3  
4  
5  
6  
7  
8  
9  
10  
11  
12  
13  
14  
15  
16  
17  
18  
19  
20  
21  
22  
23  
24  
25  
26  
27  
28  
29  
30  
31  
32  
33  
34  
35  
36  
37  
38  
39  
40  
41  
42  
43  
44  
45  
46

|                              |    |                                                                                                                                                                                      |     |                                                            |
|------------------------------|----|--------------------------------------------------------------------------------------------------------------------------------------------------------------------------------------|-----|------------------------------------------------------------|
| Variables                    | 7  | Clearly define all outcomes, exposures, predictors, potential confounders, and effect modifiers. Give diagnostic criteria, if applicable                                             | 5-7 | Lines 92-147                                               |
| Data sources/<br>measurement | 8* | For each variable of interest, give sources of data and details of methods of assessment (measurement). Describe comparability of assessment methods if there is more than one group | 31  | Supplemental Table 1. Definitions and sources of variables |
| Bias                         | 9  | Describe any efforts to address potential sources of bias                                                                                                                            | 6-7 | Lines 123 - 147                                            |
| Study size                   | 10 | Explain how the study size was arrived at                                                                                                                                            | 6-7 | Lines 92-147                                               |

Continued on next page

For peer review only

|                        |     |                                                                                                                                                                                                              |            |                        |
|------------------------|-----|--------------------------------------------------------------------------------------------------------------------------------------------------------------------------------------------------------------|------------|------------------------|
| Quantitative variables | 11  | Explain how quantitative variables were handled in the analyses. If applicable, describe which groupings were chosen and why                                                                                 | 6-7        | Lines 123 - 147        |
| Statistical methods    | 12  | (a) Describe all statistical methods, including those used to control for confounding                                                                                                                        | 6-7        | Lines 123 - 147        |
|                        |     | (b) Describe any methods used to examine subgroups and interactions                                                                                                                                          | 6-7        | Lines 123 - 147        |
|                        |     | (c) Explain how missing data were addressed                                                                                                                                                                  | 6-7        | Lines 123 - 147        |
|                        |     | (d) <i>Cohort study</i> —If applicable, explain how loss to follow-up was addressed                                                                                                                          | N/A        |                        |
|                        |     | <i>Case-control study</i> —If applicable, explain how matching of cases and controls was addressed                                                                                                           |            |                        |
|                        |     | <i>Cross-sectional study</i> —If applicable, describe analytical methods taking account of sampling strategy                                                                                                 |            |                        |
|                        |     | (e) Describe any sensitivity analyses                                                                                                                                                                        | 6-7        | Lines 123 - 147        |
| <b>Results</b>         |     |                                                                                                                                                                                                              |            |                        |
| Participants           | 13* | (a) Report numbers of individuals at each stage of study—eg numbers potentially eligible, examined for eligibility, confirmed eligible, included in the study, completing follow-up, and analysed            | 7-8        | Lines 149-164          |
|                        |     | (b) Give reasons for non-participation at each stage                                                                                                                                                         | 7-8        | Lines 149-164          |
|                        |     | (c) Consider use of a flow diagram                                                                                                                                                                           | 29         | Supplemental Figure 1  |
| Descriptive data       | 14* | (a) Give characteristics of study participants (eg demographic, clinical, social) and information on exposures and potential confounders                                                                     | 22-23, 7-8 | Table 1, Lines 149-164 |
|                        |     | (b) Indicate number of participants with missing data for each variable of interest                                                                                                                          | 7-8        | Lines 149-155          |
|                        |     | (c) <i>Cohort study</i> —Summarise follow-up time (eg, average and total amount)                                                                                                                             | 7-8        | Lines 149-155          |
| Outcome data           | 15* | <i>Cohort study</i> —Report numbers of outcome events or summary measures over time                                                                                                                          | 7-8        | Lines 149-164          |
|                        |     | <i>Case-control study</i> —Report numbers in each exposure category, or summary measures of exposure                                                                                                         |            |                        |
|                        |     | <i>Cross-sectional study</i> —Report numbers of outcome events or summary measures                                                                                                                           |            |                        |
| Main results           | 16  | (a) Give unadjusted estimates and, if applicable, confounder-adjusted estimates and their precision (eg, 95% confidence interval). Make clear which confounders were adjusted for and why they were included | 8-9        | Lines 165-212          |
|                        |     | (b) Report category boundaries when continuous variables were categorized                                                                                                                                    | 5          | Lines 105-106          |
|                        |     | (c) If relevant, consider translating estimates of relative risk into absolute risk for a meaningful time period                                                                                             | N/A        |                        |

Continued on next page

|                          |    |                                                                                                                                                                            |       |               |
|--------------------------|----|----------------------------------------------------------------------------------------------------------------------------------------------------------------------------|-------|---------------|
| Other analyses           | 17 | Report other analyses done—eg analyses of subgroups and interactions, and sensitivity analyses                                                                             | 10    | Lines 213-216 |
| <b>Discussion</b>        |    |                                                                                                                                                                            |       |               |
| Key results              | 18 | Summarise key results with reference to study objectives                                                                                                                   | 11    | Lines 220-229 |
| Limitations              | 19 | Discuss limitations of the study, taking into account sources of potential bias or imprecision. Discuss both direction and magnitude of any potential bias                 | 13-15 | Lines 280-307 |
| Interpretation           | 20 | Give a cautious overall interpretation of results considering objectives, limitations, multiplicity of analyses, results from similar studies, and other relevant evidence | 11-13 | Lines 230-279 |
| Generalisability         | 21 | Discuss the generalisability (external validity) of the study results                                                                                                      | 13-15 | Lines 280-307 |
| <b>Other information</b> |    |                                                                                                                                                                            |       |               |
| Funding                  | 22 | Give the source of funding and the role of the funders for the present study and, if applicable, for the original study on which the present article is based              |       | Title page    |

\*Give information separately for cases and controls in case-control studies and, if applicable, for exposed and unexposed groups in cohort and cross-sectional studies.

**Note:** An Explanation and Elaboration article discusses each checklist item and gives methodological background and published examples of transparent reporting. The STROBE checklist is best used in conjunction with this article (freely available on the Web sites of PLoS Medicine at <http://www.plosmedicine.org/>, Annals of Internal Medicine at <http://www.annals.org/>, and Epidemiology at <http://www.epidem.com/>). Information on the STROBE Initiative is available at [www.strobe-statement.org](http://www.strobe-statement.org).

# BMJ Open

## Pre-pregnancy body mass index and other risk factors for early- and late-onset hemolysis, elevated liver enzymes, and low platelets (HELLP) syndrome: A population-based retrospective cohort study.

|                                 |                                                                                                                                                                                                                                                                                                                                                                                                                                                                                                                                                                                                                                                                                                                                                                                                                        |
|---------------------------------|------------------------------------------------------------------------------------------------------------------------------------------------------------------------------------------------------------------------------------------------------------------------------------------------------------------------------------------------------------------------------------------------------------------------------------------------------------------------------------------------------------------------------------------------------------------------------------------------------------------------------------------------------------------------------------------------------------------------------------------------------------------------------------------------------------------------|
| Journal:                        | <i>BMJ Open</i>                                                                                                                                                                                                                                                                                                                                                                                                                                                                                                                                                                                                                                                                                                                                                                                                        |
| Manuscript ID                   | bmjopen-2023-079131.R1                                                                                                                                                                                                                                                                                                                                                                                                                                                                                                                                                                                                                                                                                                                                                                                                 |
| Article Type:                   | Original research                                                                                                                                                                                                                                                                                                                                                                                                                                                                                                                                                                                                                                                                                                                                                                                                      |
| Date Submitted by the Author:   | 30-Jan-2024                                                                                                                                                                                                                                                                                                                                                                                                                                                                                                                                                                                                                                                                                                                                                                                                            |
| Complete List of Authors:       | Wang, Li Qing; The University of British Columbia Faculty of Medicine, Department of Obstetrics and Gynaecology; BC Children's Hospital Research Institute<br>Bone, Jeffrey; BC Children's Hospital Research Institute, Research Informatics<br>Muraca, Giulia M; Hamilton, Department of Obstetrics and Gynecology<br>Razaz, Neda; Karolinska Institute, Clinical Epidemiology Division, Department of Medicine Solna<br>Joseph, K.S.; The University of British Columbia Faculty of Medicine, Department of Obstetrics and Gynaecology, School of Population and Public Health; BC Children's Hospital Research Institute<br>Lisonkova, Sarka; The University of British Columbia Faculty of Medicine, Obstetrics and Gynaecology, School of Population and Public Health; BC Children's Hospital Research Institute |
| <b>Primary Subject Heading</b>: | Obstetrics and gynaecology                                                                                                                                                                                                                                                                                                                                                                                                                                                                                                                                                                                                                                                                                                                                                                                             |
| Secondary Subject Heading:      | Epidemiology                                                                                                                                                                                                                                                                                                                                                                                                                                                                                                                                                                                                                                                                                                                                                                                                           |
| Keywords:                       | Obesity, EPIDEMIOLOGY, OBSTETRICS                                                                                                                                                                                                                                                                                                                                                                                                                                                                                                                                                                                                                                                                                                                                                                                      |
|                                 |                                                                                                                                                                                                                                                                                                                                                                                                                                                                                                                                                                                                                                                                                                                                                                                                                        |

SCHOLARONE™  
Manuscripts



I, the Submitting Author has the right to grant and does grant on behalf of all authors of the Work (as defined in the below author licence), an exclusive licence and/or a non-exclusive licence for contributions from authors who are: i) UK Crown employees; ii) where BMJ has agreed a CC-BY licence shall apply, and/or iii) in accordance with the terms applicable for US Federal Government officers or employees acting as part of their official duties; on a worldwide, perpetual, irrevocable, royalty-free basis to BMJ Publishing Group Ltd ("BMJ") its licensees and where the relevant Journal is co-owned by BMJ to the co-owners of the Journal, to publish the Work in this journal and any other BMJ products and to exploit all rights, as set out in our [licence](#).

The Submitting Author accepts and understands that any supply made under these terms is made by BMJ to the Submitting Author unless you are acting as an employee on behalf of your employer or a postgraduate student of an affiliated institution which is paying any applicable article publishing charge ("APC") for Open Access articles. Where the Submitting Author wishes to make the Work available on an Open Access basis (and intends to pay the relevant APC), the terms of reuse of such Open Access shall be governed by a Creative Commons licence – details of these licences and which [Creative Commons](#) licence will apply to this Work are set out in our licence referred to above.

Other than as permitted in any relevant BMJ Author's Self Archiving Policies, I confirm this Work has not been accepted for publication elsewhere, is not being considered for publication elsewhere and does not duplicate material already published. I confirm all authors consent to publication of this Work and authorise the granting of this licence.

1  
2  
3  
4 1 **Title:** Pre-pregnancy body mass index and other risk factors for early- and late-onset  
5  
6  
7 2 hemolysis, elevated liver enzymes, and low platelets (HELLP) syndrome: A population-  
8  
9  
10 3 based retrospective cohort study.

#### 14 4 **Authors**

15  
16  
17 5 Li Qing WANG<sup>1,2</sup>, BSc; Jeffrey N. BONE<sup>1,2</sup>, MSc; Giulia M MURACA<sup>2,3,4</sup>, MPH, PhD;  
18  
19  
20  
21 6 Neda RAZAZ<sup>5</sup>, MPH, PhD; K.S. JOSEPH<sup>1,2,6</sup>, MD, PhD; Sarka LISONKOVA<sup>1,2,6</sup>, MD, PhD  
22  
23

#### 24 7 **Affiliations**

- 25  
26  
27  
28 8 1. Department of Obstetrics and Gynaecology, University of British Columbia,  
29  
30  
31 9 Vancouver, BC, Canada.
- 32  
33  
34  
35 10 2. BC Children's Hospital Research Institute, Vancouver, BC, Canada.
- 36  
37  
38 11 3. Department of Obstetrics and Gynecology, Faculty of Health Sciences, McMaster  
39  
40  
41  
42 12 University, Hamilton, ON, Canada.
- 43  
44  
45 13 4. Department of Health Research Methods, Evidence and Impact, Faculty of  
46  
47  
48  
49 14 Health Sciences, McMaster University, Hamilton, ON, Canada
- 50  
51  
52 15 5. Clinical Epidemiology Division, Department of Medicine Solna, Karolinska  
53  
54  
55  
56 16 Institutet, Stockholm, Sweden.
- 57  
58  
59  
60



1  
2 Pre-pregnancy BMI and early- and late-onset HELLP syndrome  
3  
4

5 17 6. School of Population and Public Health, University of British Columbia,  
6  
7  
8 18 Vancouver, BC, Canada.  
9  
10

11  
12 19 **Corresponding author**  
13  
14

15  
16 20 Ms. Li Qing Wang  
17  
18

19 21 Address: 950 W 28<sup>th</sup> Ave, Vancouver, BC V5Z 4H4  
20  
21

22 22 Work: 604-875-3015; Cell: 778-513-1648; Email: [liqing.wang@bcchr.ca](mailto:liqing.wang@bcchr.ca)  
23  
24 23

25  
26  
27  
28 24 **Abstract**  
29  
30

31 25 **Background:** Obesity increases risk of pre-eclampsia, but the association with  
32  
33  
34 26 hemolysis, elevated liver enzymes, and low platelets (HELLP) syndrome is  
35  
36  
37  
38 27 understudied.  
39  
40

41  
42 28 **Objective:** To examine the association between pre-pregnancy body-mass-index (BMI)  
43  
44  
45 29 and HELLP syndrome, including early- vs. late-onset disease.  
46  
47

48  
49 30 **Study Design:** A retrospective cohort study using population-based data.  
50  
51

52 31 **Setting:** British Columbia (BC), Canada, 2008/09-2019/20.  
53  
54

55  
56 32 **Population:** All pregnancies resulting in live births or stillbirths at  $\geq 20$  weeks' gestation.  
57  
58

1 Pre-pregnancy BMI and early- and late-onset HELLP syndrome

2  
3  
4  
5 33 **Methods:** BMI categories (kg/m<sup>2</sup>) included: underweight (<18.5), normal (18.5-24.9),  
6  
7  
8  
9 34 overweight (25.0-29.9), and obese (≥30.0). Rates of early- and late-onset HELLP  
10  
11  
12 35 syndrome (<34 vs. ≥34 weeks, respectively) were calculated per 1000 ongoing  
13  
14  
15 36 pregnancies at 20 and 34 weeks' gestation, respectively. Cox regression was used to  
16  
17  
18  
19 37 assess the associations between risk factors (e.g., BMI, maternal age and parity) and  
20  
21  
22  
23 38 early- vs late-onset HELLP syndrome.  
24  
25  
26 39 **Main outcome measures:** Early- and late-onset HELLP syndrome.  
27  
28  
29  
30 40 **Results:** The rates of HELLP syndrome per 1000 women were 2.8 overall (1,116 cases  
31  
32  
33 41 among 391,941 women), and 1.9, 2.5, 3.2 and 4.0 in underweight, normal BMI,  
34  
35  
36 42 overweight and obese categories, respectively. Overall, gestational age-specific rates of  
37  
38  
39  
40 43 HELLP syndrome increased with pre-pregnancy BMI. Obesity (compared with normal  
41  
42  
43 44 BMI) was more strongly associated with early-onset HELLP syndrome (adjusted hazard  
44  
45  
46 45 ratio [AHR] 2.24, (95% confidence interval [CI] 1.65-3.04) than with late-onset HELLP  
47  
48  
49  
50 46 syndrome (AHR 1.48, 95% CI 1.23-1.80) (p-value for interaction 0.025). Chronic  
51  
52  
53  
54  
55  
56  
57  
58  
59  
60

## Pre-pregnancy BMI and early- and late-onset HELLP syndrome

hypertension, multiple gestation, bleeding (<20 weeks' gestation and antepartum) also showed differing AHRs between early- vs. late-onset HELLP syndrome.

**Conclusions:** Pre-pregnancy BMI is positively associated with HELLP syndrome and the association is stronger with early-onset HELLP syndrome. Associations with early- and late-onset HELLP syndrome differed for some risk factors, suggesting possible differences in etiologic mechanisms.

### **Strengths and limitations of this study**

- We were able to describe gestational age-specific incidence of HELLP syndrome, based on population data on all pregnancies.
- The population-based design coupled with detailed information about demographic, behavioural and clinical factors allowed robust adjustment for possible confounding.
- We did not have detailed information on laboratory values used for the diagnosis of HELLP syndrome and therefore we were not able to estimate the severity of HELLP syndrome.

## Pre-pregnancy BMI and early- and late-onset HELLP syndrome

- We did not have information about race/ethnicity, socio-economic status (SES) and prior history of pregnancy with preeclampsia/eclampsia or HELLP syndrome.
- Pre-pregnancy BMI was largely self-reported. Approximately 25% of women had missing information about BMI. We used multiple imputation methods to address this limitation.

### Key words

Hypertensive disorders of pregnancy, pregnancy complications, overweight, obesity, pre-pregnancy counseling, etiology, adverse pregnancy outcome, BMI, HELLP syndrome.

**Word count:** 3036

### Introduction

Hypertensive disorders of pregnancy, such as pre-eclampsia (PE), are among the leading causes of maternal morbidity and mortality, affecting 3-5% of pregnancies

## Pre-pregnancy BMI and early- and late-onset HELLP syndrome

77 worldwide(1,2) and accounting for up to 14% of maternal deaths.(3) Early-onset PE at  
78 <34 weeks' gestation is often associated with placental insufficiency whereas late-onset  
79 PE is often associated with pre-existing maternal health conditions such as metabolic  
80 syndrome and obesity.(4) Early- vs late-onset PE differ with regard to some risk factors,  
81 clinical management and rates of adverse perinatal outcomes.(5,6) A related condition,  
82 namely, hemolysis, elevated liver enzymes, and low platelets (HELLP) syndrome occurs  
83 in 0.2-0.8% of pregnancies(7–9) and 10-20% of cases of severe PE.(10) Although  
84 HELLP syndrome has been distinguished from PE as a separate disease,(11) it is still  
85 commonly viewed as a form of severe PE.(9) While the distinction between early- and  
86 late-onset PE and the difference in the associations between pre-pregnancy obesity and  
87 these conditions has been established, such differences have not been studied with  
88 regard to HELLP syndrome.

89 Pre-pregnancy obesity is a known modifiable risk factor for pre-eclampsia.(12–  
90 15) To date, the world prevalence of obesity has nearly tripled since 1975(16) and the  
91 proportion of pregnant women with obesity ranges from 1.8% to 25.3% globally.(17) The

## Pre-pregnancy BMI and early- and late-onset HELLP syndrome

92 prevalence of pre-pregnancy obesity was 17.8% in 2012-2016 in Ontario, Canada(18)  
93 and 29.0% in 2019 in the United States.(19) Despite the large increases in obesity in  
94 high income countries, the association between maternal pre-pregnancy body-mass-  
95 index (BMI) and HELLP syndrome has not been adequately assessed in a large  
96 population-based study to date.

97 We carried out a population-based, retrospective cohort study to examine the  
98 association between maternal pre-pregnancy BMI and HELLP syndrome and to assess  
99 differences in this association in early- vs late-onset HELLP syndrome. We  
100 hypothesized that maternal obesity is a risk factor for HELLP syndrome, and this  
101 relationship may be different in early- compared with late-onset disease. In additional  
102 analyses, we examined other risk factors for HELLP syndrome in terms of their  
103 association with early- vs late-onset HELLP syndrome.

## 104 **Materials and Methods**

### 105 *Data sources and study population*

1 Pre-pregnancy BMI and early- and late-onset HELLP syndrome

2  
3  
4  
5 106 The study included all live births and stillbirths at  $\geq 20$  weeks' gestation in British  
6  
7  
8  
9 107 Columbia, Canada, between April 1, 2008 and March 31, 2020, with data obtained from  
10  
11  
12 108 the British Columbia Perinatal Database Registry (BCPDR).(20) The BCPDR includes  
13  
14  
15  
16 109 information on  $>99\%$  of births in BC, with detailed data on maternal demographic  
17  
18  
19 110 characteristics, prenatal care, pregnancy complications, labor and delivery  
20  
21  
22  
23 111 characteristics and neonatal outcomes. Each record, abstracted from medical charts (or  
24  
25  
26 112 midwives' notes), includes up to 25 International Classification of Diseases, 10<sup>th</sup> Edition,  
27  
28  
29  
30 113 Canadian version (ICD-10-CA) codes for diagnoses related to the delivery  
31  
32  
33 114 hospitalization. Chart abstraction is standardized and conducted by trained personnel,  
34  
35  
36  
37 115 and data quality is routinely assessed. Prior validation studies showed high accuracy of  
38  
39  
40 116 collected information on labor and delivery.(21)

41  
42  
43  
44 117 ***Pre-pregnancy BMI and HELLP syndrome***

45  
46  
47  
48 118 Pre-pregnancy weight and height were based on maternal self-report or health care  
49  
50  
51  
52 119 provider assessment at  $\leq 11$  weeks' gestation.(22) BMI was classified as follows (in  
53  
54  
55 120  $\text{kg/m}^2$ ): underweight ( $<18.5$ ), normal (18.5-24.9), overweight (25.0-29.9), and obese

1 Pre-pregnancy BMI and early- and late-onset HELLP syndrome

2  
3  
4  
5 121 ( $\geq 30.0$ ).<sup>(23)</sup> The primary outcome of this study was a physician diagnosis of HELLP  
6  
7  
8 122 syndrome documented in the medical chart, and abstracted and recorded in the  
9  
10  
11  
12 123 BCPDR. In Canada, HELLP syndrome is typically diagnosed using the Tennessee  
13  
14  
15 124 classification criteria, namely lactate dehydrogenase  $\geq 600$  IU/l, liver transaminases  
16  
17  
18 125 (aspartate aminotransferase and alanine aminotransferase) elevated more than twice the  
19  
20  
21 126 upper limit of normal, and a platelet count  $< 100,000/\mu\text{l}$  ( $109/\text{l}$ ).<sup>(24)</sup> Early- and late-onset  
22  
23  
24  
25 127 HELLP syndrome were defined as HELLP syndrome with delivery at  $< 34$  weeks and  
26  
27  
28 128  $\geq 34$  weeks' gestation, respectively. Early pregnancy ultrasound was used to ascertain  
29  
30  
31  
32 129 gestational age, and the last menstrual period estimate of gestational age was used for  
33  
34  
35  
36 130 those without early pregnancy ultrasound information.

37  
38  
39 131 ***Covariates***

40  
41  
42 132 In addition to BMI, we examined the association between maternal age, nulliparity, pre-  
43  
44  
45 133 existing diabetes, chronic hypertension, *in vitro* fertilization (IVF) conception, multiple  
46  
47  
48  
49 134 gestation, bleeding before 20 weeks, antepartum bleeding or hemorrhage, substance  
50  
51  
52  
53 135 use and smoking during pregnancy and early- vs. late-onset HELLP syndrome. Alcohol  
54  
55  
56  
57  
58  
59  
60



1 Pre-pregnancy BMI and early- and late-onset HELLP syndrome

2  
3  
4  
5 136 use and prior adverse birth outcomes (prior stillbirth or neonatal death) were included as  
6  
7  
8  
9 137 potential confounders; all these factors are known to be associated with HELLP  
10  
11  
12 138 syndrome.<sup>(25)</sup> Maternal age was categorized as <25, 25-34 and ≥35 years. All chronic  
13  
14  
15  
16 139 conditions and pregnancy complications were identified using ICD-10 codes or data  
17  
18  
19 140 fields abstracted from medical charts to the BCPDR (Table A.1).

### 22 141 *Statistical analyses*

23  
24  
25  
26 142 The rates of HELLP syndrome per 1000 deliveries were compared between women in  
27  
28  
29  
30 143 each BMI category. Complete case analyses were performed for individuals with known  
31  
32  
33 144 BMI. The association between pre-pregnancy BMI and HELLP syndrome was first  
34  
35  
36  
37 145 expressed using crude hazard ratios (HR) and 95% confidence intervals (CI), obtained  
38  
39  
40 146 from a Cox model without adjustment for other risk factors.

41  
42  
43 147 Gestational age-specific rates of HELLP syndrome were compared between  
44  
45  
46  
47 148 women in the various BMI categories, using undelivered pregnancies at each  
48  
49  
50  
51 149 gestational week as the denominator. These rates were plotted, and splines with 95%  
52  
53  
54 150 confidence intervals were fitted by the generalized additive model (“gam”) smoothing

## Pre-pregnancy BMI and early- and late-onset HELLP syndrome

151 method. Cox models with interaction terms between pre-pregnancy BMI categories and  
152 gestational age at HELLP onset (<34 vs ≥34 weeks' gestation) were used to obtain  
153 crude HRs and 95% CIs. This analysis was carried out to assess whether gestational  
154 age at onset modified the association between BMI and HELLP syndrome.

155 In multivariable analyses, Cox models were also used to adjust for covariates  
156 (listed above) and to also examine their associations with early- vs late-onset of HELLP  
157 syndrome using interaction terms. We did not assess early- vs late-onset of HELLP  
158 syndrome interactions with risk factors including alcohol use and prior adverse birth  
159 outcomes due to a low number of women with HELLP syndrome in these categories,  
160 but adjusted for them in the model as potential confounders.

161 Sensitivity analyses included multiple imputations for missing BMI values based  
162 on a multiple imputation procedure using SAS statistical software (PROC MI).(26)  
163 Variables included in the imputation were those also included in the regression  
164 analyses. Ten imputed datasets were created, with the final results obtained using

1 Pre-pregnancy BMI and early- and late-onset HELLP syndrome

2  
3  
4  
5 165 Rubin's rule.(27) All analyses were repeated with the imputed dataset and results were  
6  
7  
8  
9 166 compared with the primary analyses.

10  
11  
12 167 All analyses were carried out using SAS version 9.4 (SAS Institute, Inc., Cary,  
13  
14  
15  
16 168 NC) and R version 4.0.3.(28) Ethics approval was obtained from the University of British  
17  
18  
19 169 Columbia/Children's and Women's Hospital and Health Centre of British Columbia  
20  
21  
22  
23 170 Research Ethics Board (#H20-03985).

### 24 25 26 171 *Patient and Public Involvement*

27  
28  
29  
30 172 Neither patients nor the public were involved in the design, or conduct, or reporting, or  
31  
32  
33  
34 173 dissemination plans of our research.

35  
36  
37 174

## 38 39 40 41 175 **Results**

### 42 43 44 176 *Study population*

45  
46  
47  
48 177 Overall, 538,683 women had a live birth or stillbirth in British Columbia between April 1,  
49  
50  
51 178 2008 and March 31, 2020 (Supplemental Figure 1). Records with missing gestational  
52  
53  
54  
55 179 age or those with <20 weeks' gestational duration were excluded (n=14,206, 2.6%). The

## Pre-pregnancy BMI and early- and late-onset HELLP syndrome

study population for the primary analyses included 391,941 pregnancies, after exclusion of women with missing BMI (n = 132,536; 24.6%). The overall incidence of HELLP syndrome was 2.85 (95% CI 2.68-3.01) per 1000 pregnancies (n = 1,116).

The proportion of women who were in underweight, normal BMI, overweight and obese categories prior to pregnancy was 5.7%, 59.1%, 21.4%, and 13.8%, respectively.

Pre-existing diabetes, chronic hypertension, prior adverse pregnancy outcomes (stillbirth or neonatal death), multiple gestation, gestational hypertension, gestational diabetes, proteinuria, and alcohol use during pregnancy were more frequent in women with overweight and obesity compared with women with normal BMI (Table 1).

Nulliparity and ultrasound diagnosed fetal growth restriction were observed more frequently in the underweight group. Substance use and smoking during pregnancy were more frequent in underweight, overweight, and obese groups compared with women with normal BMI.

193

### ***Unadjusted analyses for pre-pregnancy BMI***

1 Pre-pregnancy BMI and early- and late-onset HELLP syndrome

2  
3  
4  
5 195 The rates of HELLP syndrome in women in underweight, normal, overweight, and  
6  
7  
8  
9 196 obese categories were 1.9, 2.5, 3.2, and 4.0 per 1000 pregnancies, respectively (Table  
10  
11  
12 197 2). Overall, crude HRs for HELLP syndrome in women who were in the overweight and  
13  
14  
15  
16 198 obese categories were 1.29 (95% CI 1.12-1.49) and 1.62 (95% CI 1.39-1.90),  
17  
18  
19 199 respectively, compared with women who had normal BMI (Table A.2).  
20  
21

22  
23 200 The rates of early- and late-onset HELLP syndrome were 0.7 (n=275) and 2.2  
24  
25  
26 201 (n=841) per 1000 ongoing pregnancies at 20 weeks' and 34 weeks' gestation,  
27  
28  
29  
30 202 respectively (Table A.3). Most cases of HELLP syndrome occurred at or after 34 weeks  
31  
32  
33 203 (75.4%; 841 out of total 1116 cases). Frequencies of overweight and obesity, older  
34  
35  
36  
37 204 maternal age ( $\geq 35$ ), pre-existing diabetes, chronic hypertension, multiple gestation,  
38  
39  
40 205 bleeding before 20 weeks of gestation, antepartum bleeding/hemorrhage, substance  
41  
42  
43  
44 206 use and smoking were higher among women with early-onset vs. late-onset HELLP  
45  
46  
47 207 syndrome. Frequencies of underweight, younger maternal age ( $< 25$  years), nulliparity,  
48  
49  
50  
51 208 IVF conception, and alcohol use were higher among women with late-onset HELLP  
52  
53  
54 209 syndrome (Table A.3).  
55  
56  
57  
58  
59  
60

1  
2 Pre-pregnancy BMI and early- and late-onset HELLP syndrome  
3  
4

5 210 The rates of late-onset HELLP syndrome were higher than early-onset HELLP  
6  
7  
8 211 syndrome regardless of BMI category and maternal age group (Table 2). Nulliparous  
9  
10  
11  
12 212 women, those with pre-existing diabetes, chronic hypertension, prior stillbirth/neonatal  
13  
14  
15  
16 213 death, IVF conception, multiple gestation, alcohol use and substance use also had  
17  
18  
19 214 higher rates of late-onset than early-onset HELLP syndrome. Women with multiple  
20  
21  
22  
23 215 gestation had highest rate of HELLP syndrome, followed by those with chronic  
24  
25  
26 216 hypertension.

27  
28  
29 217 Differences in gestational age-specific incidence rates of HELLP syndrome by  
30  
31  
32  
33 218 BMI group are shown in Figure 1 (Panel A; Panel B shows log-transformed gestational-  
34  
35  
36 219 age specific rates).

37  
38  
39  
40 220 Gestational age-specific rates of HELLP syndrome increased over the course of  
41  
42  
43  
44 221 pregnancy, with higher rates at 36-37 weeks and a subsequent decline among women  
45  
46  
47 222 with pre-pregnancy BMI below or above normal values but not among those with normal  
48  
49  
50 223 BMI (Figure 1, Table A.4). Crude analyses showed that HRs for early-onset HELLP  
51  
52  
53  
54 224 syndrome in women in overweight and obese groups were 1.62 (95% CI 1.21-2.16) and  
55  
56  
57  
58  
59  
60

1 Pre-pregnancy BMI and early- and late-onset HELLP syndrome

2  
3  
4  
5 225 2.37 (95% CI 1.77-3.18), respectively, compared with women with normal BMI. These

6  
7  
8 226 HRs were 1.21 (95% CI 1.02-1.42) and 1.42 (95% CI 1.17-1.71) for late-onset HELLP

9  
10  
11  
12 227 syndrome, respectively (Table A.2).

13  
14  
15  
16 228

17  
18  
19 229 *Adjusted analyses*

20  
21  
22 230 The associations did not change substantially after adjusting for other risk factors (Table

23  
24  
25  
26 231 3). Gestational age at onset of HELLP syndrome modified the effect of maternal BMI on

27  
28  
29 232 HELLP syndrome, but only in the obese group. Specifically, obesity was more strongly

30  
31  
32  
33 233 associated with early-onset HELLP syndrome (AHR 2.24) than with late-onset HELLP

34  
35  
36 234 syndrome (AHR 1.48, p-value for interaction = 0.025; Table 3).

37  
38  
39  
40 235 Adjusted hazard ratios (AHR) for each risk factor calculated separately for early-

41  
42  
43  
44 236 vs late-onset HELLP syndrome are shown in Table 3. Risk factors significantly

45  
46  
47 237 associated with HELLP syndrome included overweight, obesity, advanced maternal age

48  
49  
50 238 ( $\geq 35$  years), nulliparity, pre-existing diabetes, chronic hypertension, multiple gestation,

51  
52  
53  
54 239 and antepartum bleeding/hemorrhage. Smoking during pregnancy had an inverse

## Pre-pregnancy BMI and early- and late-onset HELLP syndrome

240 association with HELLP syndrome. IVF conception was a risk factor for late-onset but  
241 not early-onset HELLP syndrome. Bleeding before 20 weeks and antepartum  
242 bleeding/hemorrhage were risk factors for early-onset but not late-onset HELLP  
243 syndrome. Obesity ( $p=0.025$ ), chronic hypertension ( $p=0.041$ ), multiple gestation  
244 ( $p=0.001$ ), bleeding before 20 weeks ( $p=0.008$ ) and antepartum bleeding/hemorrhage  
245 ( $p=0.011$ ) differed significantly in their associations with early versus late-onset HELLP  
246 syndrome (p-values for interaction).

### 247 *Sensitivity analyses*

248 Women with missing BMI were not substantially different from women with known BMI  
249 (Table A.5); and the results were not appreciably changed after the analyses were  
250 repeated using imputed BMI values (Table A.6).

251

## 252 **Discussion**

### 253 *Main findings*



## Pre-pregnancy BMI and early- and late-onset HELLP syndrome

254 To our knowledge, this is the largest contemporary study examining the association  
255 between pre-pregnancy BMI and HELLP syndrome, including early- and late-onset  
256 disease. We showed that the majority of HELLP syndrome (75.4%) occurred at or after  
257 34 weeks' gestation, with the rate of early-onset HELLP syndrome being substantially  
258 lower than that of late-onset HELLP syndrome. Women in overweight or obese groups  
259 were at elevated risk for developing HELLP syndrome. Obesity was more strongly  
260 associated with early-onset than late-onset HELLP syndrome. In addition to BMI, our  
261 study showed that chronic hypertension, bleeding before 20 weeks' gestation and  
262 antepartum bleeding/hemorrhage were stronger risk factors for early-onset HELLP  
263 syndrome, whereas multiple gestation was a stronger risk factor for late-onset HELLP  
264 syndrome.

### *Interpretation in the context of scientific literature*

266 The rate of HELLP syndrome in our study (2.8 per 1000 women) was similar to the  
267 previously reported rate of 2.5 per 1000 singleton pregnancies in Canada in 2012-  
268 2016.<sup>(25)</sup> Prior studies describing the association between pre-pregnancy obesity and

1 Pre-pregnancy BMI and early- and late-onset HELLP syndrome

2  
3  
4  
5 269 HELLP syndrome are sparse and results vary. In a retrospective cohort study from a  
6  
7  
8  
9 270 single tertiary hospital in the United States (n=434), Martin *et al.* found that maternal  
10  
11  
12 271 weight was not associated with HELLP syndrome.(29) Similarly, a case-control study  
13  
14  
15 272 (n= 129 cases and 476 controls) found no association between obesity and HELLP  
16  
17  
18  
19 273 syndrome.(30) Furthermore, a retrospective case-control study (including n=687 cases  
20  
21  
22 274 and 601 controls) showed that pre-pregnancy BMI was associated with PE but not  
23  
24  
25  
26 275 HELLP syndrome and suggested that PE and HELLP may have different  
27  
28  
29 276 pathophysiology.(12) In contrast, a population-based cohort study from Norway  
30  
31  
32  
33 277 (n=418,897) found that pre-pregnancy BMI  $\geq 30\text{kg/m}^2$  was associated with HELLP  
34  
35  
36 278 syndrome in the first but not the second pregnancy.(9) However, in that study, only 25%  
37  
38  
39  
40 279 of women with a first pregnancy and 30% of women with their second pregnancy had  
41  
42  
43  
44 280 information on BMI. More recently, a population-based study from Canada  
45  
46  
47 281 (n=1,078,323) showed that obesity documented in medical charts was a risk factor for  
48  
49  
50 282 HELLP syndrome,(31) however, obesity rates were underestimated and information on  
51  
52  
53  
54 283 BMI was not available, precluding more detailed analyses.  
55  
56  
57  
58  
59  
60

## Pre-pregnancy BMI and early- and late-onset HELLP syndrome

284 While PE is typically recognized as early- vs late-onset disease (before vs  $\geq$  34  
285 weeks gestation, respectively), this distinction is rarely made for HELLP syndrome. A  
286 prior population-based cohort study (n=96,861) showed that high pre-pregnancy BMI is  
287 a stronger risk factor for late-onset PE than early-onset PE.(15) That study also  
288 demonstrated a correlation between increased prevalence of maternal obesity in  
289 parallel with late-onset PE during the 18-year period, while the incidence of early-onset  
290 PE stayed relatively constant.(15) In contrast, our study shows a stronger association  
291 between overweight/obesity and early-onset HELLP syndrome compared with late-  
292 onset HELLP syndrome. This suggests varying pathophysiological pathways between  
293 PE and HELLP syndrome or additional obesity-related pathophysiology associated with  
294 PE that leads to liver damage at earlier gestation, for instance, obesity-associated  
295 steatosis and non-alcoholic fatty liver disease.(32) We chose the same gestational age  
296 cut-off of 34 weeks for early- vs late-onset HELLP syndrome as in pre-eclampsia.  
297 However, our data suggest an increase in gestational age-specific rates after 28 weeks'  
298 gestation in women with obesity and after 30 weeks' gestation in women without

## Pre-pregnancy BMI and early- and late-onset HELLP syndrome

299 obesity. A previous study showed a high proportion of HELLP syndrome cases  
300 occurring between 27 and 37 weeks,(33) which indicates potential dissimilarities with  
301 early- vs late-onset PE. Chronic hypertension, however, was found to be a stronger risk  
302 factor for early-onset disease for both PE(6) and HELLP syndrome compared with late-  
303 onset disease. It is worth mentioning that the known inverse association between  
304 smoking and PE(6) was also observed in HELLP syndrome in our study, and this  
305 warrants further investigation.

### *Clinical and research implications*

307 Our findings show that increases in gestational age-specific rates of HELLP syndrome  
308 vary by maternal pre-pregnancy BMI. The rates declined after 37 weeks' gestation in  
309 women who were in the underweight, overweight and obese categories, but continued  
310 increasing in women with normal BMI. This could be due to higher rates of medically  
311 indicated early-term deliveries in groups with low or high BMI, which has been shown to  
312 reduce maternal morbidity compared with expectant management.(34) It is possible that  
313 women whose pre-pregnancy BMI was below and above normal range were more likely

1 Pre-pregnancy BMI and early- and late-onset HELLP syndrome

2  
3  
4  
5 314 to be considered at-risk (due to the abnormal BMI or associated co-morbidity) and  
6  
7  
8  
9 315 therefore delivered at early term (37-38 weeks) gestation to prevent adverse maternal  
10  
11  
12 316 and infant outcomes. However, further research is needed to confirm this hypothesis. In  
13  
14  
15 317 addition to BMI, we also showed that chronic hypertension, bleeding before 20 weeks'  
16  
17  
18  
19 318 gestation and antepartum bleeding/hemorrhage were more strongly associated with  
20  
21  
22 319 early- onset HELLP syndrome, while multiple gestation was more strongly associated  
23  
24  
25  
26 320 with late-onset HELLP syndrome. The association between bleeding at <20 weeks gestation  
27  
28  
29  
30 321 and early-onset HELLP syndrome is novel. Such bleeding can be caused by abnormal  
31  
32  
33 322 placental conditions (e.g., abnormal implantation and associated bleeding), which may  
34  
35  
36  
37 323 play a role in the development of HELLP syndrome. These findings are exploratory and  
38  
39  
40 324 require confirmation by other studies. However, they raise the intriguing possibility that  
41  
42  
43  
44 325 determinants of HELLP syndrome (such as antepartum bleeding) have different  
45  
46  
47 326 associations with early and late onset HELLP syndrome depending on whether they  
48  
49  
50  
51 327 occur at <20 weeks or at  $\geq 20$  weeks' gestation. In our study, the association between  
52  
53  
54 328 antepartum bleeding at  $\geq 20$  weeks' gestation and HELLP syndrome (which could  
55  
56  
57  
58  
59  
60

1 Pre-pregnancy BMI and early- and late-onset HELLP syndrome  
2  
3  
4

5 329 have been explained as being a consequence of HELLP syndrome causing placental  
6  
7  
8  
9 330 abruption) was not significant in adjusted models.  
10

11  
12 331 ***Strengths and limitations***  
13

14  
15 332 The strengths of this study include its population-based design coupled with detailed  
16  
17  
18  
19 333 information about demographic, behavioural and clinical factors that allowed for robust  
20  
21  
22  
23 334 adjustment for possible confounding. We had a large enough sample to provide precise  
24  
25  
26 335 estimates for associations with HELLP syndrome, a rare outcome.  
27

28  
29 336 This study also has several limitations. First, we did not have detailed information  
30  
31  
32  
33 337 on laboratory values important for the diagnosis of HELLP syndrome and therefore we  
34  
35  
36  
37 338 were not able to estimate the severity of HELLP. We assumed that the diagnosis of  
38  
39  
40 339 HELLP syndrome would lead to a prompt delivery to prevent worsening of maternal  
41  
42  
43  
44 340 condition. However, in milder cases, expectant management with close observation  
45  
46  
47 341 may have led to a delay between the diagnosis and delivery, especially at very preterm  
48  
49  
50  
51 342 gestation. As a result, incidence of early-onset HELLP syndrome may have been  
52  
53  
54 343 underestimated in our study. However, we do not expect a large inaccuracy in this  
55  
56  
57  
58  
59  
60

1 Pre-pregnancy BMI and early- and late-onset HELLP syndrome

2  
3  
4  
5 344 regard because HELLP syndrome is considered a potentially life-threatening condition  
6  
7  
8  
9 345 and delivery is typically not delayed. Second, we did not have information about  
10  
11  
12 346 race/ethnicity, socio-economic status (SES) and prior history of pregnancy with  
13  
14  
15  
16 347 PE/eclampsia or HELLP syndrome, which could have resulted in residual confounding  
17  
18  
19 348 in the assessments of the relation between BMI and HELLP syndrome. However, we  
20  
21  
22  
23 349 adjusted for several possible confounders and did not observe changes in the  
24  
25  
26 350 association between BMI and HELLP syndrome, suggesting that our results are robust.  
27  
28  
29  
30 351 Third, pre-pregnancy BMI was largely self-reported, which may have led to some  
31  
32  
33 352 misclassification. Several validation studies have shown relatively good accuracy of  
34  
35  
36  
37 353 self-reported weight and height for epidemiological studies,(35–37) suggesting that a  
38  
39  
40 354 large misclassification bias is unlikely. A systematic review of BMI self-report  
41  
42  
43  
44 355 misclassification showed minimal influence on associations between BMI and  
45  
46  
47 356 pregnancy outcomes.(38)

50 357       Approximately 25% of women had missing information about BMI. These women  
51  
52  
53  
54 358 were relatively similar to those with known BMI and sensitivity analyses using imputed  
55  
56  
57  
58  
59  
60

1 Pre-pregnancy BMI and early- and late-onset HELLP syndrome  
2  
3  
4

5 359 BMI values yielded results almost identical to the main analyses. Lastly, the analyses  
6  
7  
8  
9 360 examining differences between early- and late-onset HELLP and risk factors other than  
10  
11  
12 361 BMI were exploratory, and further studies are required to confirm our findings.  
13  
14  
15  
16 362

17  
18  
19 363 ***Conclusions***  
20  
21

22 364 Consistent with what is known about PE, pre-pregnancy BMI was found to be a risk  
23  
24  
25  
26 365 factor for HELLP syndrome. However, contrary to the documented association between  
27  
28  
29  
30 366 BMI and PE, with obesity being associated more strongly with late-onset than early-  
31  
32  
33 367 onset PE, our study showed that obesity was more strongly associated with early-onset  
34  
35  
36  
37 368 than with late-onset HELLP syndrome. This suggests potentially different underlying  
38  
39  
40 369 pathophysiology for the various hypertensive disorders of pregnancy. Our findings can  
41  
42  
43  
44 370 help maternity care providers with regard to pre-pregnancy counselling. Clinicians can  
45  
46  
47 371 better identify women who may benefit from obstetric intervention, as the risk of HELLP  
48  
49  
50  
51 372 increases at late pre-term gestation in all women and continues to increase at term and  
52  
53  
54 373 post-term gestation in women with normal pre-pregnancy BMI. More research on the  
55  
56  
57  
58  
59  
60



1 Pre-pregnancy BMI and early- and late-onset HELLP syndrome

2  
3  
4  
5 374 gestational-age specific effects of pre-pregnancy BMI is needed to elucidate the

6  
7  
8  
9 375 underlying causes of HELLP syndrome.

10  
11  
12 376

13  
14  
15  
16  
17  
18  
19  
20  
21  
22  
23  
24  
25  
26  
27  
28  
29  
30  
31  
32  
33  
34  
35  
36  
37  
38  
39  
40  
41  
42  
43  
44  
45  
46  
47  
48  
49  
50  
51  
52  
53  
54  
55  
56  
57  
58  
59  
60

For peer review only

1 Pre-pregnancy BMI and early- and late-onset HELLP syndrome  
2  
3  
4

5 377 **Disclosure**  
6  
7

8 378 The authors report no conflict of interest.  
9  
10

11 379 **Disclaimer**  
12  
13

14  
15  
16 380 All inferences, opinions, and conclusions drawn in this publication are those of the  
17

18  
19 381 authors, and do not reflect the opinions or policies of Perinatal Services BC.  
20  
21  
22

23  
24 382 **Author Statement/Contribution to Authorship**  
25  
26

27  
28 383 LW and SL were involved in the conception, planning, carrying out and analyzing data  
29

30  
31 384 of the project. JNB, GMM, KSJ and NR provided helpful suggestions for the analysis.  
32  
33

34  
35 385 LW led the writing of the manuscript and received feedback from JNB, GMM, SL, KSJ,  
36

37  
38 386 NR.  
39  
40  
41

42 387 **Acknowledgement**  
43  
44

45  
46 388 We thank the Women's Health Research Institute (WHRI) for providing us with access  
47

48  
49 389 to the BCPDR database.  
50  
51  
52

53 390 **Funding statement**  
54  
55  
56  
57  
58  
59  
60

1 Pre-pregnancy BMI and early- and late-onset HELLP syndrome  
2  
3  
4

5 391 This study was funded by the Canadian Institutes for Health Research (CIHR) and the  
6  
7  
8 392 SickKids Foundation (CIHR SKF – 154852). LW receives support from a CIHR Doctoral  
9  
10  
11  
12 393 Fellowship, KSJ is supported by an Investigator award from the BC Children’s Hospital  
13  
14  
15 394 Research Institute, Canada, NR is supported by a grant from the Swedish Research  
16  
17  
18  
19 395 Council for Health, Working Life and Welfare (grant no. 2019-00041). The funding  
20  
21  
22  
23 396 sources were not involved in study design, data collection, analysis, and interpretation,  
24  
25  
26 397 writing of the manuscript, and/or decision to submit the article for publication.  
27  
28  
29

30 398

31  
32  
33 399 **Competing interests statement**  
34  
35

36 400 The authors report no conflict of interest.  
37  
38  
39

40 401 **Data availability**  
41  
42

43 402 Data may be obtained from a third party and are not publicly available.  
44  
45  
46

47 403 **Ethics Approval Statement**  
48  
49  
50  
51  
52  
53  
54  
55  
56  
57  
58  
59  
60

1 Pre-pregnancy BMI and early- and late-onset HELLP syndrome  
2  
3  
4

5 404 Ethics approval was obtained from the University of British Columbia/Children's and  
6  
7  
8 405 Women's Hospital and Health Centre of British Columbia Research Ethics Board (#H20-  
9  
10  
11  
12 406 03985).  
13  
14

15  
16 407 **References**  
17

- 18  
19 408 1. Burton GJ, Redman CW, Roberts JM, Moffett A. Pre-eclampsia: pathophysiology  
20  
21 409 and clinical implications. *BMJ*. 2019 Jul 15;366:l2381.  
22  
23 410 2. Hutcheon JA, Lisonkova S, Joseph KS. Epidemiology of pre-eclampsia and the  
24  
25 411 other hypertensive disorders of pregnancy. *Hypertens Dis Pregnancy*. 2011 Aug  
26  
27 412 1;25(4):391–403.  
28  
29 413 3. Say L Dr, Chou D MD, Gemmill A MPH, Tunçalp Ö MD, Moller AB MSc, Daniels J  
30  
31 414 PhD, et al. Global causes of maternal death: a WHO systematic analysis. *Lancet*  
32  
33 415 *Glob Health*. 2014;2(6):e323–33.  
34  
35 416 4. Valensise H, Vasapollo B, Gagliardi G, Novelli GP. Early and Late Preeclampsia.  
36  
37 417 *Hypertension*. 2008 Nov 1;52(5):873–80.  
38  
39 418 5. Wadhvani P, Saha PK, Kalra JK, Gainer S, Sundaram V. A study to compare  
40  
41 419 maternal and perinatal outcome in early vs. late onset preeclampsia. *Obstet*  
42  
43 420 *Gynecol Sci*. 2020 Apr 3;63(3):270–7.  
44  
45 421 6. Lisonkova S, Joseph KS. Incidence of preeclampsia: risk factors and outcomes  
46  
47 422 associated with early- versus late-onset disease. *Am J Obstet Gynecol*. 2013 Dec  
48  
49 423 1;209(6):544.e1-544.e12.  
50  
51  
52  
53  
54  
55  
56  
57  
58  
59  
60

## Pre-pregnancy BMI and early- and late-onset HELLP syndrome

- 424 7. Abildgaard U, Heimdal K. Pathogenesis of the syndrome of hemolysis, elevated liver  
425 enzymes, and low platelet count (HELLP): a review. *Eur J Obstet Gynecol Reprod*  
426 *Biol.* 2013 Feb 1;166(2):117–23.
- 427 8. Martin JN, Rinehart BK, May WL, Magann EF, Terrone DA, Blake PG. The spectrum  
428 of severe preeclampsia: Comparative analysis by HELLP (hemolysis, elevated liver  
429 enzyme levels, and low platelet count) syndrome classification. *Am J Obstet*  
430 *Gynecol.* 1999 Jun 1;180(6):1373–84.
- 431 9. Malmström O, Morken NH. HELLP syndrome, risk factors in first and second  
432 pregnancy: a population-based cohort study. *Acta Obstet Gynecol Scand.* 2018 Jun  
433 1;97(6):709–16.
- 434 10. Karumanchi SA, Maynard SE, Stillman IE, Epstein FH, Sukhatme VP.  
435 Preeclampsia: a renal perspective. *Kidney Int.* 2005;67(6):2101–13.
- 436 11. Weinstein L. Classic Pages-Syndrome of hemolysis, elevated liver enzymes, and  
437 low platelet count: A severe consequence of hypertension in pregnancy. *Am J*  
438 *Obstet Gynecol.* 2005;193(3):859–859.
- 439 12. Leeners B, Rath W, Kuse S, Irawan C, Imthurn B, Neumaier-Wagner P. BMI: new  
440 aspects of a classical risk factor for hypertensive disorders in pregnancy. *Clin Sci.*  
441 2006 Jun 14;111(1):81–6.
- 442 13. Schummers L, Hutcheon JA, Bodnar LM, Lieberman E, Himes KP. Risk of adverse  
443 pregnancy outcomes by prepregnancy body mass index: a population-based study  
444 to inform prepregnancy weight loss counseling. *Obstet Gynecol.* 2015  
445 Jan;125(1):133–43.
- 446 14. Bodnar LM, Catov JM, Klebanoff MA, Ness RB, Roberts JM. Prepregnancy Body  
447 Mass Index and the Occurrence of Severe Hypertensive Disorders of Pregnancy.  
448 *Epidemiology.* 2007;18(2).

1 Pre-pregnancy BMI and early- and late-onset HELLP syndrome  
2  
3  
4

- 5 449 15. Robillard PY, Dekker G, Scioscia M, Bonsante F, Iacobelli S, Boukerrou M, et al.  
6  
7 450 Increased BMI has a linear association with late-onset preeclampsia: A population-  
8  
9 451 based study. PloS One. 2019 Oct 17;14(10):e0223888–e0223888.
- 10  
11 452 16. World Health Organization. Home/Newsroom/Fact sheets/Detail/Obesity and  
12  
13 453 overweight. Obesity and overweight. Available from: [https://www.who.int/news-](https://www.who.int/newsroom/fact-sheets/detail/obesity-and-overweight)  
14  
15 454 [room/fact-sheets/detail/obesity-and-overweight](https://www.who.int/newsroom/fact-sheets/detail/obesity-and-overweight)
- 16  
17 455 17. Guelinckx I, Devlieger R, Beckers K, Vansant G. Maternal obesity: pregnancy  
18  
19 456 complications, gestational weight gain and nutrition. Obes Rev. 2008 Mar  
20  
21 457 1;9(2):140–50.
- 22  
23 458 18. Dzakpasu S, Fahey J, Kirby RS, Tough SC, Chalmers B, Heaman MI, et al.  
24  
25 459 Contribution of prepregnancy body mass index and gestational weight gain to  
26  
27 460 caesarean birth in Canada. BMC Pregnancy Childbirth. 2014 Mar 18;14(1):106.
- 28  
29 461 19. Driscoll AK, Gregory ECW. Increases in Prepregnancy Obesity: United States,  
30  
31 462 2016–2019. 2020 Nov. (NCHS Data Brief). Report No.: No. 392.
- 32  
33 463 20. Perinatal Services BC - Perinatal Data Registry [Internet]. Available from:  
34  
35 464 [http://www.perinataleservicesbc.ca/health-professionals/data-surveillance/perinatal-](http://www.perinataleservicesbc.ca/health-professionals/data-surveillance/perinatal-data-registry)  
36  
37 465 [data-registry](http://www.perinataleservicesbc.ca/health-professionals/data-surveillance/perinatal-data-registry)
- 38  
39 466 21. Frosst G, Hutcheon J, Joseph K, Kinniburgh B, Johnson C, Lee L. Validating the  
40  
41 467 British Columbia Perinatal Data Registry: a chart re-abstraction study. BMC  
42  
43 468 Pregnancy Childbirth. 2015 May 27;15(1):123.
- 44  
45 469 22. British Columbia Perinatal Data Registry Reference Manual Version 6.01 –  
46  
47 470 Addendum June 2017. Perinatal Services BC: Vancouver (BC);
- 48  
49 471 23. World Health Organization [Internet]. 2010. A healthy lifestyle - WHO  
50  
51 472 recommendations. Available from: [https://www.who.int/europe/news-room/fact-](https://www.who.int/europe/news-room/fact-sheets/item/a-healthy-lifestyle---who-recommendations)  
52  
53 473 [sheets/item/a-healthy-lifestyle---who-recommendations](https://www.who.int/europe/news-room/fact-sheets/item/a-healthy-lifestyle---who-recommendations)  
54  
55  
56  
57  
58  
59  
60

## Pre-pregnancy BMI and early- and late-onset HELLP syndrome

- 474 24. Khalid F, Mahendraker N, Tonismae T. HELLP Syndrome. StatPearls [Internet].  
475 Treasure Island (FL): StatPearls Publishing; 2023.
- 476 25. Lisonkova S, Bone JN, Muraca GM, Razaz N, Wang LQ, Sabr Y, et al. Incidence  
477 and risk factors for severe preeclampsia, hemolysis, elevated liver enzymes, and  
478 low platelet count syndrome, and eclampsia at preterm and term gestation: a  
479 population-based study. *Am J Obstet Gynecol*. 2021 Nov 1;225(5):538.e1-538.e19.
- 480 26. SAS Institute Inc. The MI Procedure: PROC MI Statement [Internet]. Available from:  
481 [https://documentation.sas.com/doc/en/statug/15.2/statug\\_mi\\_syntax01.htm](https://documentation.sas.com/doc/en/statug/15.2/statug_mi_syntax01.htm)
- 482 27. Rubin DB, Rubin DB. Multiple imputation for nonresponse in surveys [Internet].  
483 Hoboken: WILEY; 2009. Available from: <https://go.exlibris.link/fnXsLRMW>
- 484 28. R Core Team (2022). R: A language and environment for statistical computing.  
485 [Internet]. Foundation for Statistical Computing, Vienna, Austria.; Available from:  
486 <https://www.R-project.org/>
- 487 29. Martin JN, May WL, Rinehart BK, Martin RW, Magann EF. Increasing Maternal  
488 Weight: A Risk Factor for Preeclampsia/Eclampsia But Apparently Not for HELLP  
489 Syndrome. *South Med J*. 2000;93:686–91.
- 490 30. Fitzpatrick KE, Hinshaw K, Kurinczuk JJ, Knight M. Risk Factors, Management, and  
491 Outcomes of Hemolysis, Elevated Liver Enzymes, and Low Platelets Syndrome and  
492 Elevated Liver Enzymes, Low Platelets Syndrome. *Obstet Gynecol* [Internet].  
493 2014;123(3). Available from:  
494 [https://journals.lww.com/greenjournal/Fulltext/2014/03000/Risk\\_Factors,\\_Manageme  
495 nt,\\_and\\_Outcomes\\_of.19.aspx](https://journals.lww.com/greenjournal/Fulltext/2014/03000/Risk_Factors,_Management,_and_Outcomes_of.19.aspx)
- 496 31. Lisonkova S, Razaz N, Sabr Y, Muraca GM, Boutin A, Mayer C, et al. Maternal risk  
497 factors and adverse birth outcomes associated with HELLP syndrome: a population-  
498 based study. *BJOG Int J Obstet Gynaecol*. 2020 Mar 19;n/a(n/a).

## Pre-pregnancy BMI and early- and late-onset HELLP syndrome

- 499 32. Sarkar M, Grab J, Dodge JL, Gunderson EP, Rubin J, Irani RA, et al. Non-alcoholic  
500 fatty liver disease in pregnancy is associated with adverse maternal and perinatal  
501 outcomes. *J Hepatol.* 2020 Sep 1;73(3):516–22.
- 502 33. Sibai BM, Ramadan MK, Usta I, Salama M, Mercer BM, Friedman SA. Maternal  
503 morbidity and mortality in 442 pregnancies with hemolysis, elevated liver enzymes,  
504 and low platelets (HELLP syndrome). *Am J Obstet Gynecol.* 1993 Oct  
505 1;169(4):1000–6.
- 506 34. Chappell LC, Brocklehurst P, Green ME, Hunter R, Hardy P, Juszczak E, et al.  
507 Planned early delivery or expectant management for late preterm pre-eclampsia  
508 (PHOENIX): a randomised controlled trial. *The Lancet.* 2019 Sep  
509 28;394(10204):1181–90.
- 510 35. Davies A, Wellard-Cole L, Rangan A, Allman-Farinelli M. Validity of self-reported  
511 weight and height for BMI classification: A cross-sectional study among young  
512 adults. *Nutrition.* 2020 Mar 1;71:110622.
- 513 36. Fonseca H, Silva A, Matos M, Esteves I, Costa P, Guerra A, et al. Validity of BMI  
514 based on self-reported weight and height in adolescents. *Acta Paediatr.* 2010 Jan  
515 1;99(1):83–8.
- 516 37. Hodge JM, Shah R, McCullough ML, Gapstur SM, Patel AV. Validation of self-  
517 reported height and weight in a large, nationwide cohort of U.S. adults. *PLOS ONE.*  
518 2020 Apr 13;15(4):e0231229.
- 519 38. Headen I, Cohen AK, Mujahid M, Abrams B. The accuracy of self-reported  
520 pregnancy-related weight: a systematic review. *Obes Rev.* 2017 Mar 1;18(3):350–  
521 69.

522

523



Pre-pregnancy BMI and early- and late-onset HELLP syndrome

524

525

526

527

For peer review only

## Pre-pregnancy BMI and early- and late-onset HELLP syndrome

528 **Tables**529 **Table 1. Maternal demographic and clinical characteristics by pre-pregnancy body-**  
530 **mass-index; British Columbia, 2008/09-2019/20<sup>a</sup>**

|                                              | Underweight     | Normal BMI    | Overweight   | Obese        |
|----------------------------------------------|-----------------|---------------|--------------|--------------|
|                                              | n = 22,392      | n = 231,517   | n = 83,864   | n = 54,168   |
| Maternal age (years)                         |                 |               |              |              |
| < 25                                         | 4018 (17.9)     | 26332 (11.4)  | 9733 (11.6)  | 6947 (12.8)  |
| 25-34                                        | 14392<br>(64.3) | 146790 (63.4) | 52138 (62.2) | 33948 (62.7) |
| ≥ 35                                         | 3982 (17.8)     | 58395 (25.2)  | 21993 (26.2) | 13273 (24.5) |
| Nullipara                                    | 12551<br>(56.1) | 117740 (50.9) | 37202 (44.4) | 22020 (40.7) |
| Pre-existing diabetes                        | 26 (0.1)        | 693 (0.3)     | 672 (0.8)    | 1006 (1.9)   |
| Chronic hypertension                         | 23 (0.1)        | 717 (0.3)     | 727 (0.8)    | 1380 (2.6)   |
| Prior stillbirth /neonatal death             | 130 (0.6)       | 1894 (0.8)    | 979 (1.2)    | 791 (1.5)    |
| IVF conception <sup>b</sup>                  | 496 (2.2)       | 6835 (3.0)    | 2579 (3.1)   | 1639 (3.0)   |
| Multiple gestation                           |                 |               |              |              |
| Twins                                        | 253 (1.1)       | 3318 (1.4)    | 1340 (1.6)   | 895 (1.7)    |
| Triplets/Quadruplets <sup>d</sup>            | <5 (0)          | 34 (0)        | 26 (0)       | 19 (0)       |
| Bleeding < 20 weeks                          | 483 (2.2)       | 4116 (1.8)    | 1572 (1.9)   | 1166 (2.2)   |
| Antepartum bleeding/hemorrhage (≥ 20 weeks)  | 374 (1.7)       | 3352 (1.5)    | 1227 (1.5)   | 706 (1.3)    |
| Intrauterine Growth Restriction <sup>c</sup> | 987 (4.4)       | 5445 (2.4)    | 1472 (1.8)   | 953 (1.8)    |
| Gestational Hypertension                     | 547 (2.4)       | 8551 (3.7)    | 5694 (6.8)   | 6332 (11.7)  |
| Gestational Diabetes                         | 1680 (7.5)      | 19492 (8.4)   | 11548 (13.8) | 11452 (21.1) |

## Pre-pregnancy BMI and early- and late-onset HELLP syndrome

|                             |                 |               |              |              |
|-----------------------------|-----------------|---------------|--------------|--------------|
| Proteinuria                 | 161 (0.7)       | 2236 (1.0)    | 1267 (1.5)   | 1337 (2.5)   |
| Alcohol use                 | 192 (0.9)       | 2240 (1.0)    | 944 (1.1)    | 786 (1.5)    |
| Substance use               | 1118 (5.0)      | 8099 (3.5)    | 3514 (4.2)   | 2970 (5.5)   |
| Smoking                     | 1727 (7.7)      | 12943 (5.6)   | 6155 (7.3)   | 5576 (10.3)  |
| Gestational age at delivery |                 |               |              |              |
| (weeks)                     |                 |               |              |              |
| 20-27                       | 102 (0.5)       | 881 (0.4)     | 393 (0.5)    | 358 (0.7)    |
| 28-33                       | 387 (1.7)       | 3423 (1.5)    | 1473 (1.8)   | 1158 (2.1)   |
| 34-36                       | 1620 (7.2)      | 15119 (6.5)   | 6142 (7.3)   | 4680 (8.6)   |
| 37-41                       | 20076<br>(89.7) | 209831 (90.6) | 75017 (89.5) | 47448 (87.6) |
| ≥ 42                        | 207 (0.9)       | 2263 (1.0)    | 839 (1.0)    | 524 (1.0)    |

531 <sup>a</sup>Data shown as n(%)

532 <sup>b</sup>IVF = in vitro fertilization

533 <sup>c</sup>Ultrasound diagnosed intra-uterine growth restriction (IUGR)

534 <sup>d</sup>Information on cell numbers <5 was suppressed due to confidentiality reasons.

535 **Table 2. Rates of early-onset and late-onset HELLP syndrome per 1000 ongoing**  
 536 **pregnancies by maternal demographic and clinical characteristics; British Columbia,**  
 537 **2008/09-2019/20**

|                            | Early-onset<br>HELLP<br>syndrome | Late-onset<br>HELLP<br>syndrome | Overall   |
|----------------------------|----------------------------------|---------------------------------|-----------|
| Pre-pregnancy BMI category |                                  |                                 |           |
| Underweight                | 8 (0.4)                          | 35 (1.6)                        | 43 (1.9)  |
| Normal weight              | 125 (0.5)                        | 462 (2.0)                       | 587 (2.5) |
| Overweight                 | 73 (0.9)                         | 199 (2.4)                       | 272 (3.2) |
| Obese                      | 69 (1.3)                         | 145 (2.8)                       | 214 (4.0) |
| Maternal age (years)       |                                  |                                 |           |
| < 25                       | 30 (0.6)                         | 97 (2.1)                        | 127 (2.7) |

## Pre-pregnancy BMI and early- and late-onset HELLP syndrome

|                                               |           |            |            |
|-----------------------------------------------|-----------|------------|------------|
| 25-34                                         | 158 (0.6) | 512 (2.1)  | 670 (2.7)  |
| ≥ 35                                          | 87 (0.9)  | 232 (2.4)  | 319 (3.3)  |
| Nullipara                                     | 188 (1.0) | 629 (3.4)  | 817 (4.3)  |
| Pre-existing diabetes                         | 6 (2.5)   | 14 (6.3)   | 20 (8.3)   |
| Chronic hypertension                          | 19 (6.7)  | 20 (7.7)   | 39 (13.7)  |
| Prior stillbirth /neonatal death <sup>a</sup> | <5 (<1.0) | <5 (<1.0)  | 5 (1.3)    |
| IVF conception <sup>b</sup>                   | 19 (1.6)  | 73 (6.7)   | 92 (8.0)   |
| Multiple gestation                            | 33 (5.6)  | 91 (19.3)  | 124 (21.1) |
| Bleeding (< 20 weeks)                         | 12 (1.6)  | 10 (1.5)   | 22 (3.0)   |
| Antepartum Bleeding/hemorrhage (≥ 20 weeks)   | 15 (2.7)  | 12 (2.5)   | 27 (4.8)   |
| Alcohol use <sup>a</sup>                      | <5 (<1.0) | <11 (<2.7) | 12 (2.9)   |
| Substance use                                 | 14 (0.9)  | 25 (1.6)   | 39 (2.5)   |
| Smoking                                       | 14 (0.5)  | 36 (1.4)   | 50 (1.9)   |

538 <sup>a</sup>Information on cell numbers <5 was suppressed due to confidentiality reasons. Other  
 539 numbers were suppressed if needed to avoid back-calculation from the total

540 <sup>b</sup>IVF = in vitro fertilization

541

## Pre-pregnancy BMI and early- and late-onset HELLP syndrome

542 **Table 3. Adjusted hazard ratios for early-onset and late-onset HELLP syndrome with**  
 543 **95% confidence intervals; British Columbia, 2008/09-2019/20**

|                                                   | Overall<br>AHR (95% CI) <sup>a</sup> | Early-onset<br>HELLP<br>AHR (95% CI) | Late-onset HELLP<br>AHR (95% CI) | P-<br>value <sup>b</sup> |
|---------------------------------------------------|--------------------------------------|--------------------------------------|----------------------------------|--------------------------|
| <b>Pre-pregnancy BMI category</b>                 |                                      |                                      |                                  |                          |
| Underweight                                       | 0.79 (0.58-1.07)                     | 0.67 (0.33-1.38)                     | 0.82 (0.58-1.16)                 | 0.628                    |
| Normal weight                                     | Ref                                  | Ref                                  | Ref                              | Ref                      |
| Overweight                                        | 1.34 (1.16-1.55)                     | 1.63 (1.22-2.18)                     | 1.26 (1.07-1.49)                 | 0.129                    |
| Obese                                             | 1.65 (1.41-1.94)                     | 2.24 (1.65-3.04)                     | 1.48 (1.23-1.80)                 | 0.025                    |
| <b>Maternal age (years)</b>                       |                                      |                                      |                                  |                          |
| < 25                                              | 0.92 (0.76-1.12)                     | 0.92 (0.62-1.38)                     | 0.92 (0.74-1.15)                 | 0.998                    |
| 25-34                                             | Ref                                  | Ref                                  | Ref                              | Ref                      |
| ≥ 35                                              | 1.27 (1.11-1.47)                     | 1.39 (1.06-1.83)                     | 1.23 (1.05-1.45)                 | 0.445                    |
| Nullipara                                         | 2.93 (2.56-3.36)                     | 2.56 (1.97-3.33)                     | 3.09 (2.63-3.63)                 | 0.229                    |
| Pre-existing diabetes                             | 2.40 (1.51-3.80)                     | 1.64 (0.71-3.81)                     | 2.88 (1.66-5.00)                 | 0.273                    |
| Chronic hypertension                              | 3.93 (2.80-5.51)                     | 5.95 (3.62-9.79)                     | 2.92 (1.83-4.66)                 | 0.041                    |
| Prior stillbirth/neonatal death <sup>c</sup>      | 0.88 (0.36-2.13)                     | N/A                                  | N/A                              | N/A                      |
| IVF conception <sup>d</sup>                       | 1.21 (0.95-1.55)                     | 0.83 (0.50-1.41)                     | 1.37 (1.04-1.80)                 | 0.101                    |
| Multiple gestation                                | 13.66 (11.06-<br>16.87)              | 8.31 (5.59-<br>12.35)                | 17.81 (13.89-<br>22.83)          | 0.001                    |
| Bleeding at < 20 weeks                            | 0.95 (0.62-1.45)                     | 1.89 (1.05-3.39)                     | 0.60 (0.32-1.12)                 | 0.008                    |
| Antepartum bleeding or<br>hemorrhage (≥ 20 weeks) | 2.10 (1.43-3.08)                     | 3.75 (2.22-6.35)                     | 1.37 (0.77-2.43)                 | 0.011                    |
| Alcohol use <sup>e</sup>                          | 1.07 (0.60-1.90)                     | N/A                                  | N/A                              | N/A                      |
| Substance use                                     | 0.98 (0.70-1.36)                     | 1.38 (0.78-2.42)                     | 0.84 (0.56-1.27)                 | 0.166                    |
| Smoking                                           | 0.71 (0.53-0.96)                     | 0.70 (0.40-1.23)                     | 0.71 (0.50-1.01)                 | 0.963                    |

544 <sup>a</sup>AHR = adjusted hazard ratio, with 95% confidence interval in parentheses, were obtained from  
 545 the Cox model that included all variables in the table.

1  
2 Pre-pregnancy BMI and early- and late-onset HELLP syndrome  
3  
4

5 546 <sup>b</sup>p-value for interaction with early- vs late-onset HELLP syndrome.

6  
7 547 <sup>c</sup>N/A = not applicable. We did not examine differences by early- vs late-onset for prior  
8 548 stillbirth/neonatal death or alcohol use due to small sample size.

9  
10 549 <sup>d</sup>IVF = in vitro fertilization  
11  
12 550  
13  
14

15 551  
16  
17  
18 552  
19  
20  
21  
22 553  
23  
24  
25 554  
26  
27

28  
29 555 **Figure legend**  
30  
31  
32 556  
33  
34

35  
36 557 **Figure 1.** Gestational-age specific rates of HELLP syndrome for each BMI category

37  
38  
39 558 (Panel A); and log-transformed rates (Panel B). Rates from 40 to 45 weeks were

40  
41  
42  
43 559 combined. Splines with 95% confidence intervals were fitted by the generalized additive

44  
45  
46 560 model (“gam”) smoothing method.  
47  
48  
49

50 561  
51  
52

53 562 **Supplemental Figure 1.** Flowchart of study sample selection.  
54  
55  
56  
57  
58  
59  
60

Pre-pregnancy BMI and early- and late-onset HELLP syndrome

563

564

565

566

567

568

569

570

571

572

573

574

575

576

577

For peer review only



Figure 1. Gestational-age specific rates of HELLP syndrome for each BMI category (Panel A); and log-transformed rates (Panel B). Rates from 40 to 45 weeks were combined. Splines with 95% confidence intervals were fitted by the generalized additive model ("gam") smoothing method.

254x381mm (72 x 72 DPI)



1  
2  
3  
4  
5  
6  
7  
8  
9  
10  
11  
12  
13  
14  
15  
16  
17  
18  
19  
20  
21  
22  
23  
24  
25  
26  
27  
28  
29  
30  
31  
32  
33  
34  
35  
36  
37  
38  
39  
40  
41  
42  
43  
44  
45  
46  
47  
48  
49  
50  
51  
52  
53  
54  
55  
56  
57  
58  
59  
60



Supplemental Figure 1. Flowchart of study sample selection.

443x288mm (59 x 59 DPI)

## Supplementary tables

Supplemental Table 1. Definitions and sources of variables

|                       | Definition                                                                                                                                                                       | Source |
|-----------------------|----------------------------------------------------------------------------------------------------------------------------------------------------------------------------------|--------|
| Maternal age (years)  | Mother's age (in years) calculated at date of delivery.                                                                                                                          | BCPDR  |
| Nullipara             | Mother has never delivered a baby of at least 500 grams birth weight or at least 20 weeks gestation in a previous pregnancy.                                                     | BCPDR  |
| Pre-existing diabetes | Pre-existing diabetes mellitus Type 1 or Type 2, insulin used;                                                                                                                   | BCPDR  |
|                       | or 'E10','E11', 'O245','O246','O247'                                                                                                                                             | ICD-10 |
| Chronic hypertension  | 'O10','O11'                                                                                                                                                                      | ICD-10 |
| Prior stillbirth      | Mother had at least one prior live born infant, who died within the first 28 days of life.                                                                                       | BCPDR  |
| /neonatal death       | Mother had at least one prior stillbirth or intrauterine death documented.                                                                                                       |        |
| IVF conception        | Mother had in-vitro fertilization to achieve the current pregnancy.                                                                                                              | BCPDR  |
| Multiple gestation    | The incremental sequence number of babies born from the current pregnancy. Should be used with multiple_birth_count. Along with mother_id, required to link to MULTIPLE_LABOURS. | BCPDR  |

|                                              |                                                                                                                                                             |       |
|----------------------------------------------|-------------------------------------------------------------------------------------------------------------------------------------------------------------|-------|
| Antepartum bleeding                          |                                                                                                                                                             |       |
| < 20 weeks                                   | Mother had any antepartum bleeding in pregnancy < 20 weeks gestation.                                                                                       | BCPDR |
| Antepartum bleeding or hemorrhage ≥ 20 weeks | Mother had any antepartum hemorrhage or bleeding in pregnancy ≥ 20 weeks gestation, including bleeding from cervical polyps.                                | BCPDR |
| Intrauterine Growth Restriction <sup>a</sup> | Health care provider identified intrauterine growth restriction (IUGR) during the antenatal period.<br>Baby may or may not be appropriately grown at birth. | BCPDR |
| Gestational Hypertension                     | Care provider diagnosed mother with gestational hypertension during the current pregnancy.                                                                  | BCPDR |
| Gestational Diabetes                         | Gestational diabetes, insulin dependent.<br>Gestational diabetes, non-insulin dependent.                                                                    | BCPDR |
| Proteinuria                                  | Care provider diagnosed proteinuria (>+1g/L) during the current pregnancy.                                                                                  | BCPDR |
| Alcohol use                                  | Care provider lists mother's use of alcohol as a risk factor in this pregnancy.                                                                             | BCPDR |

|                             |                                                                                                                                                                                                |       |
|-----------------------------|------------------------------------------------------------------------------------------------------------------------------------------------------------------------------------------------|-------|
|                             | Mother used any of the following substances at any time during the current pregnancy:                                                                                                          |       |
| Substance use               | heroin/opioids, cocaine, methadone, solvents, or marijuana; OR care provider lists use of prescription, 'other', or unknown other drug as a risk to the pregnancy.                             | BCPDR |
| Smoking                     | Mother smoked tobacco products during pregnancy.                                                                                                                                               | BCPDR |
| Gestational age at delivery | Algorithm-based estimate of gestational age at delivery. Uses last menstrual period, first ultrasound (<20 weeks), clinical estimate from newborn exam, and documentation from maternal chart. | BCPDR |
| HELLP syndrome              | Mother was diagnosed with HELLP Syndrome (H-hemolysis, EL-elevated liver enzymes, LP-low platelet count)                                                                                       | BCPDR |

<sup>a</sup>Ultrasound diagnosed intra-uterine growth restriction (IUGR)

1  
2  
3  
4  
5  
6  
7  
8  
9  
10  
11  
12  
13  
14  
15  
16  
17  
18  
19  
20  
21  
22  
23  
24  
25  
26  
27  
28  
29  
30  
31  
32  
33  
34  
35  
36  
37  
38  
39  
40  
41  
42  
43  
44  
45  
46  
47

**Supplemental Table 2. Rates of HELLP syndrome by Body-Mass-Index category and hazard ratios with 95% confidence intervals**

|                                          | Underweight      | Normal BMI | Overweight       | Obese            |
|------------------------------------------|------------------|------------|------------------|------------------|
| <i>All pregnancies</i>                   |                  |            |                  |                  |
| N cases (rate per thousand) <sup>a</sup> | 43 (1.9)         | 587 (2.5)  | 272 (3.2)        | 214 (4.0)        |
| Crude HR <sup>b</sup>                    | 0.78 (0.57-1.06) | Ref        | 1.29 (1.12-1.49) | 1.62 (1.39-1.90) |
| <i>Early-onset HELLP (&lt; 34 wks)</i>   |                  |            |                  |                  |
| N cases (rate per thousand) <sup>a</sup> | 8 (0.4)          | 125 (0.5)  | 73 (0.9)         | 69 (1.3)         |
| Crude HR <sup>b</sup>                    | 0.66 (0.32-1.35) | Ref        | 1.62 (1.21-2.16) | 2.37 (1.77-3.18) |
| <i>Late-onset HELLP (≥ 34 wks)</i>       |                  |            |                  |                  |
| N cases (rate per thousand) <sup>a</sup> | 35 (1.6)         | 462 (2.0)  | 199 (2.4)        | 145 (2.8)        |
| Crude HR <sup>b</sup>                    | 0.81 (0.57-1.14) | Ref        | 1.21 (1.02-1.42) | 1.42 (1.17-1.71) |

<sup>a</sup>Rates are per 1000 ongoing pregnancies at 20 weeks (early-onset HELLP) and at 34 weeks gestation (late-onset HELLP).

<sup>b</sup>HR = hazard ratio, with 95% confidence interval in parentheses, unless otherwise specified

Supplemental Table 3. Maternal demographic and clinical characteristics by early- vs late-onset HELLP syndrome; British Columbia, 2008/09-2019/20<sup>a</sup>

|                            | Early-onset HELLP | Late-onset HELLP |
|----------------------------|-------------------|------------------|
|                            | n =275            | n = 841          |
| Pre-pregnancy BMI category |                   |                  |
| Underweight                | 8 (2.9)           | 35 (4.2)         |
| Normal weight              | 125 (45.5)        | 462 (54.9)       |
| Overweight                 | 73 (26.6)         | 199 (23.7)       |
| Obese                      | 69 (25.1)         | 145 (17.2)       |
| Maternal age (years)       |                   |                  |
| < 25                       | 30 (10.9)         | 97 (11.5)        |
| 25-34                      | 158 (57.5)        | 512 (60.9)       |
| ≥ 35                       | 87 (31.6)         | 232 (27.6)       |
| Nullipara                  | 188 (68.4)        | 629 (74.8)       |
| Chronic diabetes           | 6 (2.2)           | 14 (1.7)         |

1  
2  
3  
4  
5  
6  
7  
8  
9  
10  
11  
12  
13  
14  
15  
16  
17  
18  
19  
20  
21  
22  
23  
24  
25  
26  
27  
28  
29  
30  
31  
32  
33  
34  
35  
36  
37  
38  
39  
40  
41  
42  
43  
44  
45  
46  
47

|                                               |           |           |
|-----------------------------------------------|-----------|-----------|
| Chronic hypertension                          | 19 (6.9)  | 20 (2.4)  |
| Prior stillbirth /neonatal death <sup>b</sup> | <5 (<1.8) | <5 (<0.5) |
| IVF conception <sup>c</sup>                   | 19 (6.9)  | 73 (8.7)  |
| Multiple gestation                            | 33 (12.0) | 91 (10.8) |
| Bleeding (< 20 weeks)                         | 12 (4.4)  | 10 (1.2)  |
| Antepartum bleeding/hemorrhage (≥ 20 weeks)   | 15 (5.5)  | 12 (1.4)  |
| Alcohol use <sup>b</sup>                      | <5 (<1.8) | 10 (1.2)  |
| Substance use                                 | 14 (5.1)  | 25 (3.0)  |
| Smoking                                       | 14 (5.1)  | 36 (4.3)  |

<sup>a</sup>Data shown as n(%)

<sup>b</sup>Information on cell numbers <5 was suppressed due to confidentiality reasons.

<sup>c</sup>IVF = in vitro fertilization

Supplemental Table 4. Cases of HELLP syndrome at each gestational age (rate per 1000 ongoing pregnancies)<sup>a</sup>

| Gestational age<br>(weeks) | Underweight<br>n = 22,392 | Normal BMI<br>n = 231,517 | Overweight<br>n = 83,864 | Obese<br>n = 54,168 |
|----------------------------|---------------------------|---------------------------|--------------------------|---------------------|
| 20-21                      | <5/22392 (<0.22)          | <5/231517 (<0.02)         | <5/83864 (<0.06)         | <5/54168 (<0.09)    |
| 22-23                      | <5/22379 (<0.22)          | <5/231351 (<0.02)         | <5/83796 (<0.06)         | <5/54108 (<0.09)    |
| 24-25                      | <5/22356 (<0.22)          | 6/231174 (0.03)           | <5/83720 (<0.06)         | 5/54023 (0.09)      |
| 26-27                      | <5/22332 (<0.22)          | 14/230958 (0.06)          | 8/83609 (0.10)           | 6/53926 (0.11)      |
| 28-29                      | <5/22289 (0.04)           | 16/230635 (0.07)          | 14/83471 (0.17)          | 6/53810 (0.11)      |
| 30-31                      | <5/22232 (0.13)           | 22/230136 (0.10)          | 18/83269 (0.22)          | 23/53631 (0.43)     |
| 32-33                      | <5/22133 (0.14)           | 66/229249 (0.29)          | 29/82870 (0.35)          | 27/53303 (0.51)     |
| 34-35                      | 10/21902 (0.46)           | 116/227212 (0.51)         | 58/81998 (0.71)          | 42/52652 (0.80)     |
| 36-37                      | 13/21247 (0.61)           | 154/221075 (0.70)         | 70/79515 (0.88)          | 55/50825 (1.08)     |
| 38-39                      | 11/17845 (0.62)           | 131/189757 (0.69)         | 56/66951 (0.84)          | 36/40911 (0.88)     |
| ≥ 40                       | <5/6278 (<0.80)           | 61/73662 (0.83)           | 15/26327 (0.57)          | 12/15135 (0.79)     |

<sup>a</sup>Information on cell numbers <5 was suppressed due to confidentiality reasons.



Supplemental Table 5. Demographic and clinical characteristics of women missing pre-pregnancy BMI, live births and stillbirths, British Columbia, 200/09-2019/20<sup>a</sup>

|                                  | BMI not missing | BMI missing  |
|----------------------------------|-----------------|--------------|
|                                  | n = 391,941     | n = 132,536  |
| Maternal age (years)             |                 |              |
| < 25                             | 47030 (12.0)    | 20134 (15.2) |
| 25-34                            | 247268 (63.1)   | 78660 (59.4) |
| ≥ 35                             | 97643 (24.9)    | 33742 (25.5) |
| Nullipara                        | 189513 (48.4)   | 53789 (40.6) |
| Pre-existing diabetes            | 2397 (0.6)      | 913 (0.7)    |
| Chronic hypertension             | 2847 (0.7)      | 890 (0.7)    |
| Prior stillbirth /neonatal death | 3794 (1.0)      | 1734 (1.3)   |
| IVF conception <sup>b</sup>      | 11549 (3.0)     | 3877 (2.9)   |
| Multiple gestation               |                 |              |
| Twins                            | 5806 (1.5)      | 2478 (1.9)   |

|    |                                              |              |              |
|----|----------------------------------------------|--------------|--------------|
| 1  |                                              |              |              |
| 2  |                                              |              |              |
| 3  | Triplets/Quadruplets                         | 82 (0)       | 27 (0)       |
| 4  |                                              |              |              |
| 5  |                                              |              |              |
| 6  | Antepartum bleeding/hemorrhage               |              |              |
| 7  |                                              |              |              |
| 8  | < 20 weeks                                   | 7337 (1.9)   | 1813 (1.4)   |
| 9  |                                              |              |              |
| 10 | ≥ 20 weeks                                   | 5659 (1.4)   | 1496 (1.1)   |
| 11 |                                              |              |              |
| 12 |                                              |              |              |
| 13 | Intrauterine Growth Restriction <sup>c</sup> | 8857 (2.3)   | 2471 (1.9)   |
| 14 |                                              |              |              |
| 15 |                                              |              |              |
| 16 | Gestational Hypertension                     | 21124 (5.4)  | 6623 (5.0)   |
| 17 |                                              |              |              |
| 18 | Gestational Diabetes                         | 44172 (11.3) | 13248 (10.0) |
| 19 |                                              |              |              |
| 20 |                                              |              |              |
| 21 | Proteinuria                                  | 21124 (5.4)  | 6623 (5.0)   |
| 22 |                                              |              |              |
| 23 | Alcohol use                                  | 4162 (1.1)   | 1845 (1.4)   |
| 24 |                                              |              |              |
| 25 |                                              |              |              |
| 26 | Substance use                                | 15701 (4.0)  | 6758 (5.1)   |
| 27 |                                              |              |              |
| 28 | Smoking                                      | 26401 (6.7)  | 10435 (7.9)  |
| 29 |                                              |              |              |
| 30 |                                              |              |              |
| 31 | Second-hand smoke                            | 26319 (6.7)  | 7565 (5.7)   |
| 32 |                                              |              |              |

---

<sup>a</sup>Data shown as n(%)

<sup>b</sup>IVF = in vitro fertilization

<sup>c</sup>Ultrasound diagnosed intra-uterine growth restriction (IUGR)

Supplemental Table 6. Hazard Ratios and 95% confidence intervals using imputed data for missing values of BMI

|                                          | Underweight      | Normal BMI | Overweight       | Obese            |
|------------------------------------------|------------------|------------|------------------|------------------|
| Early-onset HELLP (< 34 wks)             |                  |            |                  |                  |
| N cases (rate per thousand) <sup>a</sup> | 8 (0.4)          | 164 (0.5)  | 137 (0.9)        | 71 (1.3)         |
| Adjusted HR <sup>b</sup>                 | 0.76 (0.43-1.33) | Ref        | 1.54 (1.19-2.00) | 2.06 (1.53-2.78) |
| Late-onset HELLP (≥ 34 wks)              |                  |            |                  |                  |
| N cases (rate per thousand) <sup>a</sup> | 35 (1.6)         | 572 (1.9)  | 376 (2.6)        | 148 (2.8)        |
| Adjusted HR <sup>b</sup>                 | 0.96 (0.51-1.8)  | Ref        | 1.24 (0.92-1.66) | 1.46 (1.03-2.08) |

<sup>a</sup>Rates are per 1000 ongoing pregnancies at 20 weeks (early-onset HELLP syndrome) and at 34 weeks gestation (late-onset HELLP syndrome).

<sup>b</sup>HR = hazard ratio, with 95% confidence interval in parentheses, unless otherwise specified. Adjusted for nulliparity, maternal age, chronic diabetes, chronic hypertension, in vitro fertilization, antepartum bleeding/hemorrhage, gestational diabetes, alcohol, substance use, smoking during pregnancy, prior pregnancy outcomes, and multiple gestation.

## STROBE Statement—checklist of items that should be included in reports of observational studies

|                           | Item No. | Recommendation                                                                                                                                                                                                                                                                                                                                                                                                                                                         | Page No.   | Relevant text from manuscript                                                                                                                                                                                 |
|---------------------------|----------|------------------------------------------------------------------------------------------------------------------------------------------------------------------------------------------------------------------------------------------------------------------------------------------------------------------------------------------------------------------------------------------------------------------------------------------------------------------------|------------|---------------------------------------------------------------------------------------------------------------------------------------------------------------------------------------------------------------|
| <b>Title and abstract</b> | 1        | (a) Indicate the study's design with a commonly used term in the title or the abstract                                                                                                                                                                                                                                                                                                                                                                                 | Title page | "Title: Pre-pregnancy body mass index and other risk factors for early- and late-onset hemolysis, elevated liver enzymes, and low platelets (HELLP) syndrome: A population-based retrospective cohort study." |
|                           |          | (b) Provide in the abstract an informative and balanced summary of what was done and what was found                                                                                                                                                                                                                                                                                                                                                                    | 2-3        |                                                                                                                                                                                                               |
| <b>Introduction</b>       |          |                                                                                                                                                                                                                                                                                                                                                                                                                                                                        |            |                                                                                                                                                                                                               |
| Background/rationale      | 2        | Explain the scientific background and rationale for the investigation being reported                                                                                                                                                                                                                                                                                                                                                                                   | 4-5        | Lines 67-84                                                                                                                                                                                                   |
| Objectives                | 3        | State specific objectives, including any prespecified hypotheses                                                                                                                                                                                                                                                                                                                                                                                                       | 4-5        | Lines 85-90                                                                                                                                                                                                   |
| <b>Methods</b>            |          |                                                                                                                                                                                                                                                                                                                                                                                                                                                                        |            |                                                                                                                                                                                                               |
| Study design              | 4        | Present key elements of study design early in the paper                                                                                                                                                                                                                                                                                                                                                                                                                | 5-6        | Lines 92-122                                                                                                                                                                                                  |
| Setting                   | 5        | Describe the setting, locations, and relevant dates, including periods of recruitment, exposure, follow-up, and data collection                                                                                                                                                                                                                                                                                                                                        | 5-6        | Lines 92-122                                                                                                                                                                                                  |
| Participants              | 6        | (a) <i>Cohort study</i> —Give the eligibility criteria, and the sources and methods of selection of participants. Describe methods of follow-up<br><i>Case-control study</i> —Give the eligibility criteria, and the sources and methods of case ascertainment and control selection. Give the rationale for the choice of cases and controls<br><i>Cross-sectional study</i> —Give the eligibility criteria, and the sources and methods of selection of participants | 5-6        | Lines 92-122                                                                                                                                                                                                  |
|                           |          | (b) <i>Cohort study</i> —For matched studies, give matching criteria and number of exposed and unexposed<br><i>Case-control study</i> —For matched studies, give matching criteria and the number of controls per case                                                                                                                                                                                                                                                 | N/A        | N/A                                                                                                                                                                                                           |

1  
2  
3  
4  
5  
6  
7  
8  
9  
10

|                              |    |                                                                                                                                                                                         |     |                                                                  |
|------------------------------|----|-----------------------------------------------------------------------------------------------------------------------------------------------------------------------------------------|-----|------------------------------------------------------------------|
| Variables                    | 7  | Clearly define all outcomes, exposures, predictors, potential confounders, and effect modifiers.<br>Give diagnostic criteria, if applicable                                             | 5-7 | Lines 92-147                                                     |
| Data sources/<br>measurement | 8* | For each variable of interest, give sources of data and details of methods of assessment<br>(measurement). Describe comparability of assessment methods if there is more than one group | 31  | Supplemental Table 1.<br>Definitions and sources of<br>variables |
| Bias                         | 9  | Describe any efforts to address potential sources of bias                                                                                                                               | 6-7 | Lines 123 - 147                                                  |
| Study size                   | 10 | Explain how the study size was arrived at                                                                                                                                               | 6-7 | Lines 92-147                                                     |

Continued on next page

11  
12  
13  
14  
15  
16  
17  
18  
19  
20  
21  
22  
23  
24  
25  
26  
27  
28  
29  
30  
31  
32  
33  
34  
35  
36  
37  
38  
39  
40  
41  
42  
43  
44  
45  
46

For peer review only

|                        |     |                                                                                                                                                                                                              |            |                        |
|------------------------|-----|--------------------------------------------------------------------------------------------------------------------------------------------------------------------------------------------------------------|------------|------------------------|
| Quantitative variables | 11  | Explain how quantitative variables were handled in the analyses. If applicable, describe which groupings were chosen and why                                                                                 | 6-7        | Lines 123 - 147        |
| Statistical methods    | 12  | (a) Describe all statistical methods, including those used to control for confounding                                                                                                                        | 6-7        | Lines 123 - 147        |
|                        |     | (b) Describe any methods used to examine subgroups and interactions                                                                                                                                          | 6-7        | Lines 123 - 147        |
|                        |     | (c) Explain how missing data were addressed                                                                                                                                                                  | 6-7        | Lines 123 - 147        |
|                        |     | (d) <i>Cohort study</i> —If applicable, explain how loss to follow-up was addressed                                                                                                                          | N/A        |                        |
|                        |     | <i>Case-control study</i> —If applicable, explain how matching of cases and controls was addressed                                                                                                           |            |                        |
|                        |     | <i>Cross-sectional study</i> —If applicable, describe analytical methods taking account of sampling strategy                                                                                                 |            |                        |
|                        |     | (e) Describe any sensitivity analyses                                                                                                                                                                        | 6-7        | Lines 123 - 147        |
| <b>Results</b>         |     |                                                                                                                                                                                                              |            |                        |
| Participants           | 13* | (a) Report numbers of individuals at each stage of study—eg numbers potentially eligible, examined for eligibility, confirmed eligible, included in the study, completing follow-up, and analysed            | 7-8        | Lines 149-164          |
|                        |     | (b) Give reasons for non-participation at each stage                                                                                                                                                         | 7-8        | Lines 149-164          |
|                        |     | (c) Consider use of a flow diagram                                                                                                                                                                           | 29         | Supplemental Figure 1  |
| Descriptive data       | 14* | (a) Give characteristics of study participants (eg demographic, clinical, social) and information on exposures and potential confounders                                                                     | 22-23, 7-8 | Table 1, Lines 149-164 |
|                        |     | (b) Indicate number of participants with missing data for each variable of interest                                                                                                                          | 7-8        | Lines 149-155          |
|                        |     | (c) <i>Cohort study</i> —Summarise follow-up time (eg, average and total amount)                                                                                                                             | 7-8        | Lines 149-155          |
| Outcome data           | 15* | <i>Cohort study</i> —Report numbers of outcome events or summary measures over time                                                                                                                          | 7-8        | Lines 149-164          |
|                        |     | <i>Case-control study</i> —Report numbers in each exposure category, or summary measures of exposure                                                                                                         |            |                        |
|                        |     | <i>Cross-sectional study</i> —Report numbers of outcome events or summary measures                                                                                                                           |            |                        |
| Main results           | 16  | (a) Give unadjusted estimates and, if applicable, confounder-adjusted estimates and their precision (eg, 95% confidence interval). Make clear which confounders were adjusted for and why they were included | 8-9        | Lines 165-212          |
|                        |     | (b) Report category boundaries when continuous variables were categorized                                                                                                                                    | 5          | Lines 105-106          |
|                        |     | (c) If relevant, consider translating estimates of relative risk into absolute risk for a meaningful time period                                                                                             | N/A        |                        |

Continued on next page

|                          |    |                                                                                                                                                                            |       |               |
|--------------------------|----|----------------------------------------------------------------------------------------------------------------------------------------------------------------------------|-------|---------------|
| Other analyses           | 17 | Report other analyses done—eg analyses of subgroups and interactions, and sensitivity analyses                                                                             | 10    | Lines 213-216 |
| <b>Discussion</b>        |    |                                                                                                                                                                            |       |               |
| Key results              | 18 | Summarise key results with reference to study objectives                                                                                                                   | 11    | Lines 220-229 |
| Limitations              | 19 | Discuss limitations of the study, taking into account sources of potential bias or imprecision. Discuss both direction and magnitude of any potential bias                 | 13-15 | Lines 280-307 |
| Interpretation           | 20 | Give a cautious overall interpretation of results considering objectives, limitations, multiplicity of analyses, results from similar studies, and other relevant evidence | 11-13 | Lines 230-279 |
| Generalisability         | 21 | Discuss the generalisability (external validity) of the study results                                                                                                      | 13-15 | Lines 280-307 |
| <b>Other information</b> |    |                                                                                                                                                                            |       |               |
| Funding                  | 22 | Give the source of funding and the role of the funders for the present study and, if applicable, for the original study on which the present article is based              |       | Title page    |

\*Give information separately for cases and controls in case-control studies and, if applicable, for exposed and unexposed groups in cohort and cross-sectional studies.

**Note:** An Explanation and Elaboration article discusses each checklist item and gives methodological background and published examples of transparent reporting. The STROBE checklist is best used in conjunction with this article (freely available on the Web sites of PLoS Medicine at <http://www.plosmedicine.org/>, Annals of Internal Medicine at <http://www.annals.org/>, and Epidemiology at <http://www.epidem.com/>). Information on the STROBE Initiative is available at [www.strobe-statement.org](http://www.strobe-statement.org).

# BMJ Open

## Pre-pregnancy body mass index and other risk factors for early- and late-onset hemolysis, elevated liver enzymes, and low platelets (HELLP) syndrome: A population-based retrospective cohort study in British Columbia, Canada.

|                                 |                                                                                                                                                                                                                                                                                                                                                                                                                                                                                                                                                                                                                                                                                                                                                                                                                        |
|---------------------------------|------------------------------------------------------------------------------------------------------------------------------------------------------------------------------------------------------------------------------------------------------------------------------------------------------------------------------------------------------------------------------------------------------------------------------------------------------------------------------------------------------------------------------------------------------------------------------------------------------------------------------------------------------------------------------------------------------------------------------------------------------------------------------------------------------------------------|
| Journal:                        | <i>BMJ Open</i>                                                                                                                                                                                                                                                                                                                                                                                                                                                                                                                                                                                                                                                                                                                                                                                                        |
| Manuscript ID                   | bmjopen-2023-079131.R2                                                                                                                                                                                                                                                                                                                                                                                                                                                                                                                                                                                                                                                                                                                                                                                                 |
| Article Type:                   | Original research                                                                                                                                                                                                                                                                                                                                                                                                                                                                                                                                                                                                                                                                                                                                                                                                      |
| Date Submitted by the Author:   | 28-Feb-2024                                                                                                                                                                                                                                                                                                                                                                                                                                                                                                                                                                                                                                                                                                                                                                                                            |
| Complete List of Authors:       | Wang, Li Qing; The University of British Columbia Faculty of Medicine, Department of Obstetrics and Gynaecology; BC Children's Hospital Research Institute<br>Bone, Jeffrey; BC Children's Hospital Research Institute, Research Informatics<br>Muraca, Giulia M; Hamilton, Department of Obstetrics and Gynecology<br>Razaz, Neda; Karolinska Institute, Clinical Epidemiology Division, Department of Medicine Solna<br>Joseph, K.S.; The University of British Columbia Faculty of Medicine, Department of Obstetrics and Gynaecology, School of Population and Public Health; BC Children's Hospital Research Institute<br>Lisonkova, Sarka; The University of British Columbia Faculty of Medicine, Obstetrics and Gynaecology, School of Population and Public Health; BC Children's Hospital Research Institute |
| <b>Primary Subject Heading</b>: | Obstetrics and gynaecology                                                                                                                                                                                                                                                                                                                                                                                                                                                                                                                                                                                                                                                                                                                                                                                             |
| Secondary Subject Heading:      | Epidemiology                                                                                                                                                                                                                                                                                                                                                                                                                                                                                                                                                                                                                                                                                                                                                                                                           |
| Keywords:                       | Obesity, EPIDEMIOLOGY, OBSTETRICS                                                                                                                                                                                                                                                                                                                                                                                                                                                                                                                                                                                                                                                                                                                                                                                      |
|                                 |                                                                                                                                                                                                                                                                                                                                                                                                                                                                                                                                                                                                                                                                                                                                                                                                                        |

SCHOLARONE™  
Manuscripts





I, the Submitting Author has the right to grant and does grant on behalf of all authors of the Work (as defined in the below author licence), an exclusive licence and/or a non-exclusive licence for contributions from authors who are: i) UK Crown employees; ii) where BMJ has agreed a CC-BY licence shall apply, and/or iii) in accordance with the terms applicable for US Federal Government officers or employees acting as part of their official duties; on a worldwide, perpetual, irrevocable, royalty-free basis to BMJ Publishing Group Ltd ("BMJ") its licensees and where the relevant Journal is co-owned by BMJ to the co-owners of the Journal, to publish the Work in this journal and any other BMJ products and to exploit all rights, as set out in our [licence](#).

The Submitting Author accepts and understands that any supply made under these terms is made by BMJ to the Submitting Author unless you are acting as an employee on behalf of your employer or a postgraduate student of an affiliated institution which is paying any applicable article publishing charge ("APC") for Open Access articles. Where the Submitting Author wishes to make the Work available on an Open Access basis (and intends to pay the relevant APC), the terms of reuse of such Open Access shall be governed by a Creative Commons licence – details of these licences and which [Creative Commons](#) licence will apply to this Work are set out in our licence referred to above.

Other than as permitted in any relevant BMJ Author's Self Archiving Policies, I confirm this Work has not been accepted for publication elsewhere, is not being considered for publication elsewhere and does not duplicate material already published. I confirm all authors consent to publication of this Work and authorise the granting of this licence.

1  
2  
3  
4 1 **Title:** Pre-pregnancy body mass index and other risk factors for early- and late-onset  
5  
6  
7 2 hemolysis, elevated liver enzymes, and low platelets (HELLP) syndrome: A population-  
8  
9  
10 3 based retrospective cohort study in British Columbia, Canada.  
11  
12

#### 13 14 4 **Authors**

15  
16  
17 5 Li Qing WANG<sup>1,2</sup>, BSc; Jeffrey N. BONE<sup>1,2</sup>, MSc; Giulia M MURACA<sup>2,3,4</sup>, MPH, PhD;  
18  
19  
20  
21 6 Neda RAZAZ<sup>5</sup>, MPH, PhD; K.S. JOSEPH<sup>1,2,6</sup>, MD, PhD; Sarka LISONKOVA<sup>1,2,6</sup>, MD, PhD  
22  
23

#### 24 7 **Affiliations**

- 25  
26  
27  
28 8 1. Department of Obstetrics and Gynaecology, University of British Columbia,  
29  
30  
31 9 Vancouver, BC, Canada.  
32  
33  
34  
35 10 2. BC Children's Hospital Research Institute, Vancouver, BC, Canada.  
36  
37  
38 11 3. Department of Obstetrics and Gynecology, Faculty of Health Sciences, McMaster  
39  
40  
41  
42 12 University, Hamilton, ON, Canada.  
43  
44  
45 13 4. Department of Health Research Methods, Evidence and Impact, Faculty of  
46  
47  
48  
49 14 Health Sciences, McMaster University, Hamilton, ON, Canada  
50  
51  
52 15 5. Clinical Epidemiology Division, Department of Medicine Solna, Karolinska  
53  
54  
55  
56 16 Institutet, Stockholm, Sweden.  
57  
58  
59  
60

1 Pre-pregnancy BMI and early- and late-onset HELLP syndrome

2  
3  
4  
5 17 6. School of Population and Public Health, University of British Columbia,  
6  
7  
8  
9 18 Vancouver, BC, Canada.

10  
11  
12 19 **Corresponding author**

13  
14  
15 20 Ms. Li Qing Wang

16  
17  
18  
19 21 Address: 950 W 28<sup>th</sup> Ave, Vancouver, BC V5Z 4H4

20  
21  
22 22 Work: 604-875-3015; Cell: 778-513-1648; Email: [liqing.wang@bcchr.ca](mailto:liqing.wang@bcchr.ca)

23  
24  
25  
26  
27 24 **Abstract**

28  
29  
30  
31 25 **Background:** Obesity increases risk of pre-eclampsia, but the association with  
32  
33  
34  
35 26 hemolysis, elevated liver enzymes, and low platelets (HELLP) syndrome is  
36  
37  
38 27 understudied.

39  
40  
41  
42 28 **Objective:** To examine the association between pre-pregnancy body-mass-index (BMI)  
43  
44  
45 29 and HELLP syndrome, including early- vs. late-onset disease.

46  
47  
48 30 **Study Design:** A retrospective cohort study using population-based data.

49  
50  
51  
52 31 **Setting:** British Columbia (BC), Canada, 2008/09-2019/20.

53  
54  
55  
56 32 **Population:** All pregnancies resulting in live births or stillbirths at  $\geq 20$  weeks' gestation.

1 Pre-pregnancy BMI and early- and late-onset HELLP syndrome  
2  
3  
4

5 **33 Methods:** BMI categories (kg/m<sup>2</sup>) included: underweight (<18.5), normal (18.5-24.9),  
6  
7

8 **34** overweight (25.0-29.9), and obese (≥30.0). Rates of early- and late-onset HELLP  
9  
10

11 **35** syndrome (<34 vs. ≥34 weeks, respectively) were calculated per 1000 ongoing  
12  
13

14 **36** pregnancies at 20 and 34 weeks' gestation, respectively. Cox regression was used to  
15  
16

17 **37** assess the associations between risk factors (e.g., BMI, maternal age and parity) and  
18  
19

20 **38** early- vs late-onset HELLP syndrome.  
21  
22

23 **39 Main outcome measures:** Early- and late-onset HELLP syndrome.  
24  
25

26 **40 Results:** The rates of HELLP syndrome per 1000 women were 2.8 overall (1,116 cases  
27  
28

29 **41** among 391,941 women), and 1.9, 2.5, 3.2 and 4.0 in underweight, normal BMI,  
30  
31  
32

33 **42** overweight and obese categories, respectively. Overall, gestational age-specific rates of  
34  
35

36 **43** HELLP syndrome increased with pre-pregnancy BMI. Obesity (compared with normal  
37  
38  
39

40 **44** BMI) was more strongly associated with early-onset HELLP syndrome (adjusted hazard  
41  
42

43 **45** ratio [AHR] 2.24, (95% confidence interval [CI] 1.65-3.04) than with late-onset HELLP  
44  
45  
46

47 **46** syndrome (AHR 1.48, 95% CI 1.23-1.80) (p-value for interaction 0.025). Chronic  
48  
49  
50  
51  
52  
53  
54  
55  
56  
57  
58  
59  
60

## Pre-pregnancy BMI and early- and late-onset HELLP syndrome

hypertension, multiple gestation, bleeding (<20 weeks' gestation and antepartum) also showed differing AHRs between early- vs. late-onset HELLP syndrome.

**Conclusions:** Pre-pregnancy BMI is positively associated with HELLP syndrome and the association is stronger with early-onset HELLP syndrome. Associations with early- and late-onset HELLP syndrome differed for some risk factors, suggesting possible differences in etiologic mechanisms.

### **Strengths and limitations of this study**

- We were able to describe gestational age-specific incidence of HELLP syndrome, based on population data on all pregnancies.
- The population-based design coupled with detailed information about demographic, behavioural and clinical factors allowed robust adjustment for possible confounding.
- We did not have detailed information on laboratory values used for the diagnosis of HELLP syndrome and therefore we were not able to estimate the severity of HELLP syndrome.

## Pre-pregnancy BMI and early- and late-onset HELLP syndrome

- 62 • We did not have information about race/ethnicity, socio-economic status (SES)  
63 and prior history of pregnancy with preeclampsia/eclampsia or HELLP syndrome.
- 64 • Approximately 25% of women had missing information about BMI, and we used  
65 multiple imputation methods to address this limitation.

### 67 **Key words**

68 Hypertensive disorders of pregnancy, pregnancy complications, overweight, obesity,  
69 pre-pregnancy counseling, etiology, adverse pregnancy outcome, BMI, HELLP  
70 syndrome.

71 **Word count: 3036**

72

73

74

75

76

## Pre-pregnancy BMI and early- and late-onset HELLP syndrome

77

78

79

80

### 81 Introduction

82 Hypertensive disorders of pregnancy, such as pre-eclampsia (PE), are among the

83 leading causes of maternal morbidity and mortality, affecting 3-5% of pregnancies

84 worldwide(1,2) and accounting for up to 14% of maternal deaths.(3) Early-onset PE at

85 <34 weeks' gestation is often associated with placental insufficiency whereas late-onset

86 PE is often associated with pre-existing maternal health conditions such as metabolic

87 syndrome and obesity.(4) Early- vs late-onset PE differ with regard to some risk factors,

88 clinical management and rates of adverse perinatal outcomes.(5,6) A related condition,

89 namely, hemolysis, elevated liver enzymes, and low platelets (HELLP) syndrome occurs

90 in 0.2-0.8% of pregnancies(7-9) and 10-20% of cases of severe PE.(10) Although

91 HELLP syndrome has been distinguished from PE as a separate disease,(11) it is still

## Pre-pregnancy BMI and early- and late-onset HELLP syndrome

92 commonly viewed as a form of severe PE.(9) While the distinction between early- and  
93 late-onset PE and the difference in the associations between pre-pregnancy obesity and  
94 these conditions has been established, such differences have not been studied with  
95 regard to HELLP syndrome.

96 Pre-pregnancy obesity is a known modifiable risk factor for pre-eclampsia.(12–  
97 15) To date, the world prevalence of obesity has nearly tripled since 1975(16) and the  
98 proportion of pregnant women with obesity ranges from 1.8% to 25.3% globally.(17) The  
99 prevalence of pre-pregnancy obesity was 17.8% in 2012-2016 in Ontario, Canada(18)  
100 and 29.0% in 2019 in the United States.(19) Despite the large increases in obesity in  
101 high income countries, the association between maternal pre-pregnancy body-mass-  
102 index (BMI) and HELLP syndrome has not been adequately assessed in a large  
103 population-based study to date.

104 We carried out a population-based, retrospective cohort study to examine the  
105 association between maternal pre-pregnancy BMI and HELLP syndrome and to assess  
106 differences in this association in early- vs late-onset HELLP syndrome. We



## Pre-pregnancy BMI and early- and late-onset HELLP syndrome

107 hypothesized that maternal obesity is a risk factor for HELLP syndrome, and this  
108 relationship may be different in early- compared with late-onset disease. In additional  
109 analyses, we examined other risk factors for HELLP syndrome in terms of their  
110 association with early- vs late-onset HELLP syndrome.

### 111 **Materials and Methods**

#### 112 *Data sources and study population*

113 The study included all live births and stillbirths at  $\geq 20$  weeks' gestation in British  
114 Columbia, Canada, between April 1, 2008 and March 31, 2020, with data obtained from  
115 the British Columbia Perinatal Database Registry (BCPDR).<sup>(20)</sup> The BCPDR includes  
116 information on >99% of births in BC, with detailed data on maternal demographic  
117 characteristics, prenatal care, pregnancy complications, labor and delivery  
118 characteristics and neonatal outcomes. Each record, abstracted from medical charts (or  
119 midwives' notes), includes up to 25 International Classification of Diseases, 10<sup>th</sup> Edition,  
120 Canadian version (ICD-10-CA) codes for diagnoses related to the delivery  
121 hospitalization. Chart abstraction is standardized and conducted by trained personnel,

1 Pre-pregnancy BMI and early- and late-onset HELLP syndrome

2  
3  
4  
5 122 and data quality is routinely assessed. Prior validation studies showed high accuracy of  
6  
7  
8  
9 123 collected information on labor and delivery.(21)

10  
11  
12  
13 124 *Pre-pregnancy BMI and HELLP syndrome*

14  
15  
16 125 Pre-pregnancy weight and height were based on maternal self-report or health care

17  
18  
19  
20 126 provider assessment at  $\leq 11$  weeks' gestation.(22) BMI was classified as follows (in

21  
22  
23 127  $\text{kg/m}^2$ ): underweight ( $< 18.5$ ), normal ( $18.5-24.9$ ), overweight ( $25.0-29.9$ ), and obese

24  
25  
26  
27 128 ( $\geq 30.0$ ).<sup>(23)</sup> The primary outcome of this study was a physician diagnosis of HELLP

28  
29  
30 129 syndrome documented in the medical chart, and abstracted and recorded in the

31  
32  
33  
34 130 BCPDR. In Canada, HELLP syndrome is typically diagnosed using the Tennessee

35  
36  
37 131 classification criteria, namely lactate dehydrogenase  $\geq 600$  IU/l, liver transaminases

38  
39  
40 132 (aspartate aminotransferase and alanine aminotransferase) elevated more than twice

41  
42  
43  
44 133 the upper limit of normal, and a platelet count  $< 100,000/\mu\text{l}$  ( $109/\text{l}$ ).<sup>(24)</sup> Early- and late-

45  
46  
47 134 onset HELLP syndrome were defined as HELLP syndrome with delivery at  $< 34$  weeks

48  
49  
50  
51 135 and  $\geq 34$  weeks' gestation, respectively. Early pregnancy ultrasound was used to

## Pre-pregnancy BMI and early- and late-onset HELLP syndrome

ascertain gestational age, and the last menstrual period estimate of gestational age was used for those without early pregnancy ultrasound information.

### ***Covariates***

In addition to BMI, we examined the association between maternal age, nulliparity, pre-existing diabetes, chronic hypertension, *in vitro* fertilization (IVF) conception, multiple gestation, bleeding before 20 weeks, antepartum bleeding or hemorrhage, substance use and smoking during pregnancy and early- vs. late-onset HELLP syndrome. Alcohol use and prior adverse birth outcomes (prior stillbirth or neonatal death) were included as potential confounders; all these factors are known to be associated with HELLP syndrome.<sup>(25)</sup> Maternal age was categorized as <25, 25-34 and ≥35 years. All chronic conditions and pregnancy complications were identified using ICD-10 codes or data fields abstracted from medical charts to the BCPDR (Table A.1).

### ***Statistical analyses***

The rates of HELLP syndrome per 1000 deliveries were compared between women in each BMI category. Complete case analyses were performed for individuals with known

1 Pre-pregnancy BMI and early- and late-onset HELLP syndrome

2  
3  
4  
5 151 BMI. The association between pre-pregnancy BMI and HELLP syndrome was first  
6  
7  
8  
9 152 expressed using crude hazard ratios (HR) and 95% confidence intervals (CI), obtained  
10  
11  
12 153 from a Cox model without adjustment for other risk factors.  
13  
14

15  
16 154 Gestational age-specific rates of HELLP syndrome were compared between  
17  
18  
19 155 women in the various BMI categories, using undelivered pregnancies at each  
20  
21  
22 156 gestational week as the denominator. These rates were plotted, and splines with 95%  
23  
24  
25  
26 157 confidence intervals were fitted by the generalized additive model (“gam”) smoothing  
27  
28  
29 158 method. Cox models with interaction terms between pre-pregnancy BMI categories and  
30  
31  
32  
33 159 gestational age at HELLP onset (<34 vs ≥34 weeks’ gestation) were used to obtain  
34  
35  
36 160 crude HRs and 95% Confidence Intervals (CIs). This analysis was carried out to assess  
37  
38  
39  
40 161 whether gestational age at onset modified the association between BMI and HELLP  
41  
42  
43  
44 162 syndrome.  
45  
46

47 163 In multivariable analyses, Cox models were also used to adjust for covariates  
48  
49  
50 164 (listed above) and to also examine their associations with early- vs late-onset of HELLP  
51  
52  
53  
54 165 syndrome using interaction terms. We did not assess early- vs late-onset of HELLP  
55  
56  
57  
58  
59  
60

1 Pre-pregnancy BMI and early- and late-onset HELLP syndrome

2  
3  
4  
5 166 syndrome interactions with risk factors including alcohol use and prior adverse birth  
6  
7  
8  
9 167 outcomes due to a low number of women with HELLP syndrome in these categories,  
10  
11  
12 168 but adjusted for them in the model as potential confounders.  
13  
14

15  
16 169 Sensitivity analyses included multiple imputations for missing BMI values based  
17  
18  
19 170 on a multiple imputation procedure using SAS statistical software (PROC MI).(26)  
20  
21  
22 171 Variables included in the imputation were those also included in the regression  
23  
24  
25  
26 172 analyses. Ten imputed datasets were created, with the final results obtained using  
27  
28  
29  
30 173 Rubin's rule.(27) All analyses were repeated with the imputed dataset and results were  
31  
32  
33 174 compared with the primary analyses.  
34  
35

36 175 All analyses were carried out using SAS version 9.4 (SAS Institute, Inc., Cary,  
37  
38  
39  
40 176 NC) and R version 4.0.3.(28) Ethics approval was obtained from the University of British  
41  
42  
43  
44 177 Columbia/Children's and Women's Hospital and Health Centre of British Columbia  
45  
46  
47 178 Research Ethics Board (#H20-03985).  
48  
49

50 179 ***Patient and Public Involvement***  
51  
52  
53  
54  
55  
56  
57  
58  
59  
60

## Pre-pregnancy BMI and early- and late-onset HELLP syndrome

180 Neither patients nor the public were involved in the design, or conduct, or reporting, or  
181 dissemination plans of our research. We used only de-identified information and the  
182 need for patient's consent was waived.

183

### 184 Results

#### 185 *Study population*

186 Overall, 538,683 women had a live birth or stillbirth in British Columbia between April 1,  
187 2008 and March 31, 2020 (Supplemental Figure 1). Records with missing gestational  
188 age or those with <20 weeks' gestational duration were excluded (n=14,206, 2.6%). The  
189 study population for the primary analyses included 391,941 pregnancies, after exclusion  
190 of women with missing BMI (n = 132,536; 24.6%). The overall incidence of HELLP  
191 syndrome was 2.85 (95% CI 2.68-3.01) per 1000 pregnancies (n = 1,116).

192 The proportion of women who were in underweight, normal BMI, overweight and  
193 obese categories prior to pregnancy was 5.7%, 59.1%, 21.4%, and 13.8%, respectively.

194 Pre-existing diabetes, chronic hypertension, prior adverse pregnancy outcomes

1 Pre-pregnancy BMI and early- and late-onset HELLP syndrome

2  
3  
4  
5 195 (stillbirth or neonatal death), multiple gestation, gestational hypertension, gestational

6  
7  
8 196 diabetes, proteinuria, and alcohol use during pregnancy were more frequent in women

9  
10  
11  
12 197 with overweight and obesity compared with women with normal BMI (Table 1).

13  
14  
15 198 Nulliparity and ultrasound diagnosed fetal growth restriction were observed more

16  
17  
18  
19 199 frequently in the underweight group. Substance use and smoking during pregnancy

20  
21  
22 200 were more frequent in underweight, overweight, and obese groups compared with

23  
24  
25  
26 201 women with normal BMI.

27  
28  
29  
30 202

31  
32  
33 203 ***Unadjusted analyses for pre-pregnancy BMI***

34  
35  
36 204 The rates of HELLP syndrome in women in underweight, normal, overweight, and

37  
38  
39  
40 205 obese categories were 1.9, 2.5, 3.2, and 4.0 per 1000 pregnancies, respectively (Table

41  
42  
43 206 2). Overall, crude HRs for HELLP syndrome in women who were in the overweight and

44  
45  
46  
47 207 obese categories were 1.29 (95% CI 1.12-1.49) and 1.62 (95% CI 1.39-1.90),

48  
49  
50 208 respectively, compared with women who had normal BMI (Table A.2).

## Pre-pregnancy BMI and early- and late-onset HELLP syndrome

209 The rates of early- and late-onset HELLP syndrome were 0.7 (n=275) and 2.2  
210 (n=841) per 1000 ongoing pregnancies at 20 weeks' and 34 weeks' gestation,  
211 respectively (Table A.3). Most cases of HELLP syndrome occurred at or after 34 weeks  
212 (75.4%; 841 out of total 1116 cases). Frequencies of overweight and obesity, older  
213 maternal age ( $\geq 35$ ), pre-existing diabetes, chronic hypertension, multiple gestation,  
214 bleeding before 20 weeks of gestation, antepartum bleeding/hemorrhage, substance  
215 use and smoking were higher among women with early-onset vs. late-onset HELLP  
216 syndrome. Frequencies of underweight, younger maternal age ( $< 25$  years), nulliparity,  
217 IVF conception, and alcohol use were higher among women with late-onset HELLP  
218 syndrome (Table A.3).

219 The rates of late-onset HELLP syndrome were higher than early-onset HELLP  
220 syndrome regardless of BMI category and maternal age group (Table 2). Nulliparous  
221 women, those with pre-existing diabetes, chronic hypertension, prior stillbirth/neonatal  
222 death, IVF conception, multiple gestation, alcohol use and substance use also had  
223 higher rates of late-onset than early-onset HELLP syndrome. Women with multiple



1 Pre-pregnancy BMI and early- and late-onset HELLP syndrome

2  
3  
4  
5 224 gestation had highest rate of HELLP syndrome, followed by those with chronic  
6  
7  
8  
9 225 hypertension.

10  
11  
12 226 Differences in gestational age-specific incidence rates of HELLP syndrome by

13  
14  
15  
16 227 BMI group are shown in Figure 1 (Panel A; Panel B shows log-transformed gestational-  
17  
18  
19 228 age specific rates).

20  
21  
22 229 Gestational age-specific rates of HELLP syndrome increased over the course of

23  
24  
25  
26 230 pregnancy, with higher rates at 36-37 weeks and a subsequent decline among women

27  
28  
29 231 with pre-pregnancy BMI below or above normal values but not among those with normal

30  
31  
32  
33 232 BMI (Figure 1, Table A.4). Crude analyses showed that HRs for early-onset HELLP

34  
35  
36 233 syndrome in women in overweight and obese groups were 1.62 (95% CI 1.21-2.16) and

37  
38  
39  
40 234 2.37 (95% CI 1.77-3.18), respectively, compared with women with normal BMI. These

41  
42  
43 235 HRs were 1.21 (95% CI 1.02-1.42) and 1.42 (95% CI 1.17-1.71) for late-onset HELLP

44  
45  
46  
47 236 syndrome, respectively (Table A.2).

48  
49  
50 237

51  
52  
53  
54 238 *Adjusted analyses*

1 Pre-pregnancy BMI and early- and late-onset HELLP syndrome

2  
3  
4  
5 239 The associations did not change substantially after adjusting for other risk factors (Table  
6  
7  
8  
9 240 3). Gestational age at onset of HELLP syndrome modified the effect of maternal BMI on  
10  
11  
12 241 HELLP syndrome, but only in the obese group. Specifically, obesity was more strongly  
13  
14  
15  
16 242 associated with early-onset HELLP syndrome (AHR 2.24) than with late-onset HELLP  
17  
18  
19 243 syndrome (AHR 1.48, p-value for interaction = 0.025; Table 3).

20  
21  
22  
23 244 Adjusted hazard ratios (AHR) for each risk factor calculated separately for early-  
24  
25  
26 245 vs late-onset HELLP syndrome are shown in Table 3. Risk factors significantly  
27  
28  
29  
30 246 associated with HELLP syndrome included overweight, obesity, advanced maternal age  
31  
32  
33 247 ( $\geq 35$  years), nulliparity, pre-existing diabetes, chronic hypertension, multiple gestation,  
34  
35  
36  
37 248 and antepartum bleeding/hemorrhage. Smoking during pregnancy had an inverse  
38  
39  
40 249 association with HELLP syndrome. IVF conception was a risk factor for late-onset but  
41  
42  
43  
44 250 not early-onset HELLP syndrome. Bleeding before 20 weeks and antepartum  
45  
46  
47 251 bleeding/hemorrhage were risk factors for early-onset but not late-onset HELLP  
48  
49  
50  
51 252 syndrome. Obesity (p=0.025), chronic hypertension (p=0.041), multiple gestation  
52  
53  
54 253 (p=0.001), bleeding before 20 weeks (p=0.008) and antepartum bleeding/hemorrhage  
55  
56  
57  
58  
59  
60

## Pre-pregnancy BMI and early- and late-onset HELLP syndrome

( $p=0.011$ ) differed significantly in their associations with early versus late-onset HELLP syndrome ( $p$ -values for interaction).

### ***Sensitivity analyses***

Women with missing BMI were not substantially different from women with known BMI (Table A.5); and the results were not appreciably changed after the analyses were repeated using imputed BMI values (Table A.6).

## **Discussion**

### ***Main findings***

To our knowledge, this is the largest contemporary study examining the association between pre-pregnancy BMI and HELLP syndrome, including early- and late-onset disease. We showed that the majority of HELLP syndrome (75.4%) occurred at or after 34 weeks' gestation, with the rate of early-onset HELLP syndrome being substantially lower than that of late-onset HELLP syndrome. Women in overweight or obese groups were at elevated risk for developing HELLP syndrome. Obesity was more strongly

## Pre-pregnancy BMI and early- and late-onset HELLP syndrome

269 associated with early-onset than late-onset HELLP syndrome. In addition to BMI, our  
270 study showed that chronic hypertension, bleeding before 20 weeks' gestation and  
271 antepartum bleeding/hemorrhage were stronger risk factors for early-onset HELLP  
272 syndrome, whereas multiple gestation was a stronger risk factor for late-onset HELLP  
273 syndrome.

### 274 *Interpretation in the context of scientific literature*

275 The rate of HELLP syndrome in our study (2.8 per 1000 women) was similar to the  
276 previously reported rate of 2.5 per 1000 singleton pregnancies in Canada in 2012-  
277 2016.(25) Prior studies describing the association between pre-pregnancy obesity and  
278 HELLP syndrome are sparse and results vary. In a retrospective cohort study from a  
279 single tertiary hospital in the United States (n=434), Martin *et al.* found that maternal  
280 weight was not associated with HELLP syndrome.(29) Similarly, a case-control study  
281 (n= 129 cases and 476 controls) found no association between obesity and HELLP  
282 syndrome.(30) Furthermore, a retrospective case-control study (including n=687 cases  
283 and 601 controls) showed that pre-pregnancy BMI was associated with PE but not

1 Pre-pregnancy BMI and early- and late-onset HELLP syndrome

2  
3  
4  
5 284 HELLP syndrome and suggested that PE and HELLP may have different  
6  
7  
8  
9 285 pathophysiology.(12) In contrast, a population-based cohort study from Norway  
10  
11  
12 286 (n=418,897) found that pre-pregnancy BMI  $\geq 30\text{kg/m}^2$  was associated with HELLP  
13  
14  
15  
16 287 syndrome in the first but not the second pregnancy.(9) However, in that study, only 25%  
17  
18  
19 288 of women with a first pregnancy and 30% of women with their second pregnancy had  
20  
21  
22  
23 289 information on BMI. More recently, a population-based study from Canada  
24  
25  
26 290 (n=1,078,323) showed that obesity documented in medical charts was a risk factor for  
27  
28  
29  
30 291 HELLP syndrome,(31) however, obesity rates were underestimated and information on  
31  
32  
33 292 BMI was not available, precluding more detailed analyses.

34  
35  
36 293 While PE is typically recognized as early- vs late-onset disease (before vs  $\geq 34$   
37  
38  
39  
40 294 weeks gestation, respectively), this distinction is rarely made for HELLP syndrome. A  
41  
42  
43  
44 295 prior population-based cohort study (n=96,861) showed that high pre-pregnancy BMI is  
45  
46  
47 296 a stronger risk factor for late-onset PE than early-onset PE.(15) That study also  
48  
49  
50  
51 297 demonstrated a correlation between increased prevalence of maternal obesity in  
52  
53  
54 298 parallel with late-onset PE during the 18-year period, while the incidence of early-onset

1 Pre-pregnancy BMI and early- and late-onset HELLP syndrome

2  
3  
4  
5 299 PE stayed relatively constant.(15) In contrast, our study shows a stronger association  
6  
7  
8  
9 300 between overweight/obesity and early-onset HELLP syndrome compared with late-  
10  
11  
12 301 onset HELLP syndrome. This suggests varying pathophysiological pathways between  
13  
14  
15 302 PE and HELLP syndrome or additional obesity-related pathophysiology associated with  
16  
17  
18  
19 303 PE that leads to liver damage at earlier gestation, for instance, obesity-associated  
20  
21  
22 304 steatosis and non-alcoholic fatty liver disease.(32) We chose the same gestational age  
23  
24  
25  
26 305 cut-off of 34 weeks for early- vs late-onset HELLP syndrome as in pre-eclampsia.  
27  
28  
29 306 However, our data suggest an increase in gestational age-specific rates after 28 weeks'  
30  
31  
32  
33 307 gestation in women with obesity and after 30 weeks' gestation in women without  
34  
35  
36  
37 308 obesity. A previous study showed a high proportion of HELLP syndrome cases  
38  
39  
40 309 occurring between 27 and 37 weeks,(33) which indicates potential dissimilarities with  
41  
42  
43  
44 310 early- vs late-onset PE. Chronic hypertension, however, was found to be a stronger risk  
45  
46  
47 311 factor for early-onset disease for both PE(6) and HELLP syndrome compared with late-  
48  
49  
50  
51 312 onset disease. It is worth mentioning that the known inverse association between  
52  
53  
54  
55  
56  
57  
58  
59  
60

1 Pre-pregnancy BMI and early- and late-onset HELLP syndrome

2  
3  
4  
5 313 smoking and PE(6) was also observed in HELLP syndrome in our study, and this  
6  
7  
8  
9 314 warrants further investigation.

10  
11  
12 315 *Clinical and research implications*

13  
14  
15 316 Our findings show that increases in gestational age-specific rates of HELLP syndrome  
16  
17  
18  
19 317 vary by maternal pre-pregnancy BMI. The rates declined after 37 weeks' gestation in  
20  
21  
22  
23 318 women who were in the underweight, overweight and obese categories, but continued  
24  
25  
26 319 increasing in women with normal BMI. This could be due to higher rates of medically  
27  
28  
29  
30 320 indicated early-term deliveries in groups with low or high BMI, which has been shown to  
31  
32  
33 321 reduce maternal morbidity compared with expectant management.(34) It is possible that  
34  
35  
36  
37 322 women whose pre-pregnancy BMI was below and above normal range were more likely  
38  
39  
40 323 to be considered at-risk (due to the abnormal BMI or associated co-morbidity) and  
41  
42  
43  
44 324 therefore delivered at early term (37-38 weeks) gestation to prevent adverse maternal  
45  
46  
47 325 and infant outcomes. However, further research is needed to confirm this hypothesis. In  
48  
49  
50  
51 326 addition to BMI, we also showed that chronic hypertension, bleeding before 20 weeks'  
52  
53  
54 327 gestation and antepartum bleeding/hemorrhage were more strongly associated with  
55  
56  
57  
58  
59  
60

## Pre-pregnancy BMI and early- and late-onset HELLP syndrome

328 early- onset HELLP syndrome, while multiple gestation was more strongly associated  
329 with late-onset HELLP syndrome. The association between bleeding at <20 weeks  
330 gestation and early-onset HELLP syndrome is novel. Such bleeding can be caused by  
331 abnormal placental conditions (e.g., abnormal implantation and associated bleeding),  
332 which may play a role in the development of HELLP syndrome. These findings are  
333 exploratory and require confirmation by other studies. However, they raise the intriguing  
334 possibility that determinants of HELLP syndrome (such as antepartum bleeding) have  
335 different associations with early and late onset HELLP syndrome depending on whether  
336 they occur at <20 weeks or at  $\geq 20$  weeks' gestation. In our study, the association  
337 between antepartum bleeding at  $\geq 20$  weeks' gestation and HELLP syndrome (which  
338 could have been explained as being a consequence of HELLP syndrome causing  
339 placental abruption) was not significant in adjusted models.

### 340 ***Strengths and limitations***

341 The strengths of this study include its population-based design coupled with detailed  
342 information about demographic, behavioural and clinical factors that allowed for robust



1 Pre-pregnancy BMI and early- and late-onset HELLP syndrome

2  
3  
4  
5 343 adjustment for possible confounding. We had a large enough sample to provide precise  
6  
7  
8  
9 344 estimates for associations with HELLP syndrome, a rare outcome.

10  
11  
12 345 This study also has several limitations. First, we did not have detailed information  
13  
14  
15  
16 346 on laboratory values important for the diagnosis of HELLP syndrome and therefore we  
17  
18  
19 347 were not able to estimate the severity of HELLP. We assumed that the diagnosis of  
20  
21  
22  
23 348 HELLP syndrome would lead to a prompt delivery to prevent worsening of maternal  
24  
25  
26 349 condition. However, in milder cases, expectant management with close observation  
27  
28  
29  
30 350 may have led to a delay between the diagnosis and delivery, especially at very preterm  
31  
32  
33 351 gestation. As a result, incidence of early-onset HELLP syndrome may have been  
34  
35  
36  
37 352 underestimated in our study. However, we do not expect a large inaccuracy in this  
38  
39  
40 353 regard because HELLP syndrome is considered a potentially life-threatening condition  
41  
42  
43  
44 354 and delivery is typically not delayed. Second, we did not have information about  
45  
46  
47 355 race/ethnicity, socio-economic status (SES) and prior history of pregnancy with  
48  
49  
50  
51 356 PE/eclampsia or HELLP syndrome, which could have resulted in residual confounding  
52  
53  
54 357 in the assessments of the relation between BMI and HELLP syndrome. However, we  
55  
56  
57  
58  
59  
60

1 Pre-pregnancy BMI and early- and late-onset HELLP syndrome

2  
3  
4  
5 358 adjusted for several possible confounders and did not observe changes in the  
6  
7  
8  
9 359 association between BMI and HELLP syndrome, suggesting that our results are robust.  
10  
11  
12 360 Third, pre-pregnancy BMI was largely self-reported, which may have led to some  
13  
14  
15 361 misclassification. Several validation studies have shown relatively good accuracy of  
16  
17  
18  
19 362 self-reported weight and height for epidemiological studies,(35–37) suggesting that a  
20  
21  
22  
23 363 large misclassification bias is unlikely. A systematic review of BMI self-report  
24  
25  
26 364 misclassification showed minimal influence on associations between BMI and  
27  
28  
29  
30 365 pregnancy outcomes.(38)

31  
32  
33 366 Approximately 25% of women had missing information about BMI. These women  
34  
35  
36  
37 367 were relatively similar to those with known BMI and sensitivity analyses using imputed  
38  
39  
40 368 BMI values yielded results almost identical to the main analyses. Lastly, the analyses  
41  
42  
43  
44 369 examining differences between early- and late-onset HELLP and risk factors other than  
45  
46  
47 370 BMI were exploratory, and further studies are required to confirm our findings.

48  
49  
50  
51 371

52  
53  
54 372 ***Conclusions***

1 Pre-pregnancy BMI and early- and late-onset HELLP syndrome

2  
3  
4  
5 373 Consistent with what is known about PE, pre-pregnancy BMI was found to be a risk  
6  
7  
8  
9 374 factor for HELLP syndrome. However, contrary to the documented association between  
10  
11  
12 375 BMI and PE, with obesity being associated more strongly with late-onset than early-  
13  
14  
15  
16 376 onset PE, our study showed that obesity was more strongly associated with early-onset  
17  
18  
19 377 than with late-onset HELLP syndrome. This suggests potentially different underlying  
20  
21  
22  
23 378 pathophysiology for the various hypertensive disorders of pregnancy. Our findings can  
24  
25  
26 379 help maternity care providers with regard to pre-pregnancy counselling. Clinicians can  
27  
28  
29  
30 380 better identify women who may benefit from obstetric intervention, as the risk of HELLP  
31  
32  
33 381 increases at late pre-term gestation in all women and continues to increase at term and  
34  
35  
36  
37 382 post-term gestation in women with normal pre-pregnancy BMI. More research on the  
38  
39  
40 383 gestational-age specific effects of pre-pregnancy BMI is needed to elucidate the  
41  
42  
43  
44 384 underlying causes of HELLP syndrome.

45  
46  
47 385  
48  
49  
50  
51  
52  
53  
54  
55  
56  
57  
58  
59  
60

1 Pre-pregnancy BMI and early- and late-onset HELLP syndrome  
2  
3  
4

5 386 **Disclosure**  
6  
7

8  
9 387 The authors report no conflict of interest.  
10  
11

12 388 **Disclaimer**  
13  
14  
15

16 389 All inferences, opinions, and conclusions drawn in this publication are those of the  
17  
18

19  
20 390 authors, and do not reflect the opinions or policies of Perinatal Services BC.  
21  
22  
23

24 391 **Author Statement/Contribution to Authorship**  
25  
26  
27

28 392 LW and SL were involved in the conception, planning, carrying out and analyzing data  
29  
30

31 393 of the project. JNB, GMM, KSJ and NR provided helpful suggestions for the analysis.  
32  
33  
34

35 394 LW led the writing of the manuscript and received feedback from JNB, GMM, SL, KSJ,  
36  
37

38 395 NR.  
39  
40  
41  
42

43 396 **Acknowledgement**  
44  
45

46 397 We thank the Women's Health Research Institute (WHRI) for providing us with access  
47  
48

49 398 to the BCPDR database.  
50  
51  
52

53 399 **Funding statement**  
54  
55  
56  
57  
58  
59  
60

1 Pre-pregnancy BMI and early- and late-onset HELLP syndrome  
2  
3  
4

5 400 This study was funded by the Canadian Institutes for Health Research (CIHR) and the  
6  
7  
8 401 SickKids Foundation (CIHR SKF – 154852). LW receives support from a CIHR Doctoral  
9  
10  
11  
12 402 Fellowship, KSJ is supported by an Investigator award from the BC Children’s Hospital  
13  
14  
15 403 Research Institute, Canada, NR is supported by a grant from the Swedish Research  
16  
17  
18  
19 404 Council for Health, Working Life and Welfare (grant no. 2019-00041). The funding  
20  
21  
22  
23 405 sources were not involved in study design, data collection, analysis, and interpretation,  
24  
25  
26 406 writing of the manuscript, and/or decision to submit the article for publication.  
27  
28  
29

30 407

31  
32  
33 408 **Competing interests statement**  
34  
35

36 409 The authors report no conflict of interest.  
37  
38  
39

40 410 **Data Sharing Statement**  
41  
42

43 411 Data may be obtained from a third party and are not publicly available.  
44  
45  
46

47 412 **Ethics Approval Statement**  
48  
49  
50  
51  
52  
53  
54  
55  
56  
57  
58  
59  
60

1 Pre-pregnancy BMI and early- and late-onset HELLP syndrome  
2  
3  
4

5 413 Ethics approval was obtained from the University of British Columbia/Children's and  
6  
7

8  
9 414 Women's Hospital and Health Centre of British Columbia Research Ethics Board (#H20-  
10  
11

12 415 03985).  
13  
14

15  
16 416  
17  
18

19  
20 417  
21  
22

23  
24 418  
25  
26

27  
28 419  
29  
30

31  
32 420  
33  
34

35  
36 421  
37  
38

39  
40  
41 422  
42  
43

44  
45 423  
46  
47

48  
49 424  
50  
51

52  
53 425  
54  
55

1 Pre-pregnancy BMI and early- and late-onset HELLP syndrome  
2  
3  
4

5 426  
6  
7

8  
9 427  
10  
11  
12

13 428 **References**  
14  
15

16  
17 429 1. Burton GJ, Redman CW, Roberts JM, Moffett A. Pre-eclampsia: pathophysiology  
18 and clinical implications. *BMJ*. 2019 Jul 15;366:l2381.  
19 430

20  
21 431 2. Hutcheon JA, Lisonkova S, Joseph KS. Epidemiology of pre-eclampsia and the  
22 other hypertensive disorders of pregnancy. *Hypertens Dis Pregnancy*. 2011 Aug  
23 432 1;25(4):391–403.  
24 433

25  
26  
27 434 3. Say L Dr, Chou D MD, Gemmill A MPH, Tunçalp Ö MD, Moller AB MSc, Daniels J  
28 PhD, et al. Global causes of maternal death: a WHO systematic analysis. *Lancet*  
29 435 *Glob Health*. 2014;2(6):e323–33.  
30 436

31  
32  
33 437 4. Valensise H, Vasapollo B, Gagliardi G, Novelli GP. Early and Late Preeclampsia.  
34 *Hypertension*. 2008 Nov 1;52(5):873–80.  
35 438

36  
37  
38 439 5. Wadhvani P, Saha PK, Kalra JK, Gainer S, Sundaram V. A study to compare  
39 440 maternal and perinatal outcome in early vs. late onset preeclampsia. *Obstet*  
40 441 *Gynecol Sci*. 2020 Apr 3;63(3):270–7.  
41  
42  
43

44 442 6. Lisonkova S, Joseph KS. Incidence of preeclampsia: risk factors and outcomes  
45 443 associated with early- versus late-onset disease. *Am J Obstet Gynecol*. 2013 Dec  
46 444 1;209(6):544.e1-544.e12.  
47  
48  
49

50  
51 445 7. Abildgaard U, Heimdal K. Pathogenesis of the syndrome of hemolysis, elevated liver  
52 446 enzymes, and low platelet count (HELLP): a review. *Eur J Obstet Gynecol Reprod*  
53 447 *Biol*. 2013 Feb 1;166(2):117–23.  
54  
55  
56  
57  
58  
59  
60

## Pre-pregnancy BMI and early- and late-onset HELLP syndrome

- 448 8. Martin JN, Rinehart BK, May WL, Magann EF, Terrone DA, Blake PG. The spectrum  
449 of severe preeclampsia: Comparative analysis by HELLP (hemolysis, elevated liver  
450 enzyme levels, and low platelet count) syndrome classification. *Am J Obstet  
451 Gynecol.* 1999 Jun 1;180(6):1373–84.
- 452 9. Malmström O, Morken NH. HELLP syndrome, risk factors in first and second  
453 pregnancy: a population-based cohort study. *Acta Obstet Gynecol Scand.* 2018 Jun  
454 1;97(6):709–16.
- 455 10. Karumanchi SA, Maynard SE, Stillman IE, Epstein FH, Sukhatme VP.  
456 Preeclampsia: a renal perspective. *Kidney Int.* 2005;67(6):2101–13.
- 457 11. Weinstein L. Classic Pages-Syndrome of hemolysis, elevated liver enzymes, and  
458 low platelet count: A severe consequence of hypertension in pregnancy. *Am J  
459 Obstet Gynecol.* 2005;193(3):859–859.
- 460 12. Leeners B, Rath W, Kuse S, Irawan C, Imthurn B, Neumaier-Wagner P. BMI: new  
461 aspects of a classical risk factor for hypertensive disorders in pregnancy. *Clin Sci.*  
462 2006 Jun 14;111(1):81–6.
- 463 13. Schummers L, Hutcheon JA, Bodnar LM, Lieberman E, Himes KP. Risk of adverse  
464 pregnancy outcomes by prepregnancy body mass index: a population-based study  
465 to inform prepregnancy weight loss counseling. *Obstet Gynecol.* 2015  
466 Jan;125(1):133–43.
- 467 14. Bodnar LM, Catov JM, Klebanoff MA, Ness RB, Roberts JM. Prepregnancy Body  
468 Mass Index and the Occurrence of Severe Hypertensive Disorders of Pregnancy.  
469 *Epidemiology.* 2007;18(2).
- 470 15. Robillard PY, Dekker G, Scioscia M, Bonsante F, Iacobelli S, Boukerrou M, et al.  
471 Increased BMI has a linear association with late-onset preeclampsia: A population-  
472 based study. *PloS One.* 2019 Oct 17;14(10):e0223888–e0223888.



1 Pre-pregnancy BMI and early- and late-onset HELLP syndrome  
2  
3  
4

- 5 473 16. World Health Organization. Home/Newsroom/Fact sheets/Detail/Obesity and  
6 474 overweight. Obesity and overweight. Available from: [https://www.who.int/news-](https://www.who.int/newsroom/fact-sheets/detail/obesity-and-overweight)  
7 475 [room/fact-sheets/detail/obesity-and-overweight](https://www.who.int/newsroom/fact-sheets/detail/obesity-and-overweight)  
8  
9  
10  
11 476 17. Guelinckx I, Devlieger R, Beckers K, Vansant G. Maternal obesity: pregnancy  
12 477 complications, gestational weight gain and nutrition. *Obes Rev.* 2008 Mar  
13 478 1;9(2):140–50.  
14  
15  
16  
17 479 18. Dzakpasu S, Fahey J, Kirby RS, Tough SC, Chalmers B, Heaman MI, et al.  
18 480 Contribution of prepregnancy body mass index and gestational weight gain to  
19 481 caesarean birth in Canada. *BMC Pregnancy Childbirth.* 2014 Mar 18;14(1):106.  
20  
21  
22  
23 482 19. Driscoll AK, Gregory ECW. Increases in Prepregnancy Obesity: United States,  
24 483 2016–2019. 2020 Nov. (NCHS Data Brief). Report No.: No. 392.  
25  
26  
27  
28 484 20. Perinatal Services BC - Perinatal Data Registry [Internet]. Available from:  
29 485 [http://www.perinataleservicesbc.ca/health-professionals/data-surveillance/perinatal-](http://www.perinataleservicesbc.ca/health-professionals/data-surveillance/perinatal-data-registry)  
30 486 [data-registry](http://www.perinataleservicesbc.ca/health-professionals/data-surveillance/perinatal-data-registry)  
31  
32  
33  
34 487 21. Frosst G, Hutcheon J, Joseph K, Kinniburgh B, Johnson C, Lee L. Validating the  
35 488 British Columbia Perinatal Data Registry: a chart re-abstraction study. *BMC*  
36 489 *Pregnancy Childbirth.* 2015 May 27;15(1):123.  
37  
38  
39  
40  
41 490 22. British Columbia Perinatal Data Registry Reference Manual Version 6.01 –  
42 491 Addendum June 2017. Perinatal Services BC: Vancouver (BC);  
43  
44  
45 492 23. World Health Organization [Internet]. 2010. A healthy lifestyle - WHO  
46 493 recommendations. Available from: [https://www.who.int/europe/news-room/fact-](https://www.who.int/europe/news-room/fact-sheets/item/a-healthy-lifestyle---who-recommendations)  
47 494 [sheets/item/a-healthy-lifestyle---who-recommendations](https://www.who.int/europe/news-room/fact-sheets/item/a-healthy-lifestyle---who-recommendations)  
48  
49  
50  
51 495 24. Khalid F, Mahendraker N, Tonismae T. HELLP Syndrome. StatPearls [Internet].  
52 496 Treasure Island (FL): StatPearls Publishing; 2023.  
53  
54  
55  
56  
57  
58  
59  
60

## Pre-pregnancy BMI and early- and late-onset HELLP syndrome

- 1  
2  
3  
4  
5 497 25. Lisonkova S, Bone JN, Muraca GM, Razaz N, Wang LQ, Sabr Y, et al. Incidence  
6 498 and risk factors for severe preeclampsia, hemolysis, elevated liver enzymes, and  
7 499 low platelet count syndrome, and eclampsia at preterm and term gestation: a  
8 500 population-based study. *Am J Obstet Gynecol*. 2021 Nov 1;225(5):538.e1-538.e19.
- 11  
12  
13 501 26. SAS Institute Inc. The MI Procedure: PROC MI Statement [Internet]. Available from:  
14 502 [https://documentation.sas.com/doc/en/statug/15.2/statug\\_mi\\_syntax01.htm](https://documentation.sas.com/doc/en/statug/15.2/statug_mi_syntax01.htm)
- 16  
17  
18 503 27. Rubin DB, Rubin DB. Multiple imputation for nonresponse in surveys [Internet].  
19 504 Hoboken: WILEY; 2009. Available from: <https://go.exlibris.link/fnXsLRMW>
- 21  
22 505 28. R Core Team (2022). R: A language and environment for statistical computing.  
23 506 [Internet]. Foundation for Statistical Computing, Vienna, Austria.; Available from:  
24 507 <https://www.R-project.org/>
- 27  
28 508 29. Martin JN, May WL, Rinehart BK, Martin RW, Magann EF. Increasing Maternal  
29 509 Weight: A Risk Factor for Preeclampsia/Eclampsia But Apparently Not for HELLP  
30 510 Syndrome. *South Med J*. 2000;93:686–91.
- 33  
34  
35 511 30. Fitzpatrick KE, Hinshaw K, Kurinczuk JJ, Knight M. Risk Factors, Management, and  
36 512 Outcomes of Hemolysis, Elevated Liver Enzymes, and Low Platelets Syndrome and  
37 513 Elevated Liver Enzymes, Low Platelets Syndrome. *Obstet Gynecol* [Internet].  
38 514 2014;123(3). Available from:  
39 515 [https://journals.lww.com/greenjournal/Fulltext/2014/03000/Risk\\_Factors,\\_Manageme](https://journals.lww.com/greenjournal/Fulltext/2014/03000/Risk_Factors,_Manageme)  
40 516 [nt,\\_and\\_Outcomes\\_of.19.aspx](https://journals.lww.com/greenjournal/Fulltext/2014/03000/Risk_Factors,_Manageme)
- 45  
46 517 31. Lisonkova S, Razaz N, Sabr Y, Muraca GM, Boutin A, Mayer C, et al. Maternal risk  
47 518 factors and adverse birth outcomes associated with HELLP syndrome: a population-  
48 519 based study. *BJOG Int J Obstet Gynaecol*. 2020 Mar 19;n/a(n/a).
- 51  
52 520 32. Sarkar M, Grab J, Dodge JL, Gunderson EP, Rubin J, Irani RA, et al. Non-alcoholic  
53 521 fatty liver disease in pregnancy is associated with adverse maternal and perinatal  
54 522 outcomes. *J Hepatol*. 2020 Sep 1;73(3):516–22.

## Pre-pregnancy BMI and early- and late-onset HELLP syndrome

- 523 33. Sibai BM, Ramadan MK, Usta I, Salama M, Mercer BM, Friedman SA. Maternal  
524 morbidity and mortality in 442 pregnancies with hemolysis, elevated liver enzymes,  
525 and low platelets (HELLP syndrome). *Am J Obstet Gynecol.* 1993 Oct  
526 1;169(4):1000–6.
- 527 34. Chappell LC, Brocklehurst P, Green ME, Hunter R, Hardy P, Juszczak E, et al.  
528 Planned early delivery or expectant management for late preterm pre-eclampsia  
529 (PHOENIX): a randomised controlled trial. *The Lancet.* 2019 Sep  
530 28;394(10204):1181–90.
- 531 35. Davies A, Wellard-Cole L, Rangan A, Allman-Farinelli M. Validity of self-reported  
532 weight and height for BMI classification: A cross-sectional study among young  
533 adults. *Nutrition.* 2020 Mar 1;71:110622.
- 534 36. Fonseca H, Silva A, Matos M, Esteves I, Costa P, Guerra A, et al. Validity of BMI  
535 based on self-reported weight and height in adolescents. *Acta Paediatr.* 2010 Jan  
536 1;99(1):83–8.
- 537 37. Hodge JM, Shah R, McCullough ML, Gapstur SM, Patel AV. Validation of self-  
538 reported height and weight in a large, nationwide cohort of U.S. adults. *PLOS ONE.*  
539 2020 Apr 13;15(4):e0231229.
- 540 38. Headen I, Cohen AK, Mujahid M, Abrams B. The accuracy of self-reported  
541 pregnancy-related weight: a systematic review. *Obes Rev.* 2017 Mar 1;18(3):350–  
542 69.

Pre-pregnancy BMI and early- and late-onset HELLP syndrome

547

548

For peer review only

## Pre-pregnancy BMI and early- and late-onset HELLP syndrome

549 **Tables**550 **Table 1. Maternal demographic and clinical characteristics by pre-pregnancy body-**  
551 **mass-index; British Columbia, 2008/09-2019/20<sup>a</sup>**

|                                              | Underweight     | Normal BMI    | Overweight   | Obese        |
|----------------------------------------------|-----------------|---------------|--------------|--------------|
|                                              | n = 22,392      | n = 231,517   | n = 83,864   | n = 54,168   |
| Maternal age (years)                         |                 |               |              |              |
| < 25                                         | 4018 (17.9)     | 26332 (11.4)  | 9733 (11.6)  | 6947 (12.8)  |
| 25-34                                        | 14392<br>(64.3) | 146790 (63.4) | 52138 (62.2) | 33948 (62.7) |
| ≥ 35                                         | 3982 (17.8)     | 58395 (25.2)  | 21993 (26.2) | 13273 (24.5) |
| Nullipara                                    | 12551<br>(56.1) | 117740 (50.9) | 37202 (44.4) | 22020 (40.7) |
| Pre-existing diabetes                        | 26 (0.1)        | 693 (0.3)     | 672 (0.8)    | 1006 (1.9)   |
| Chronic hypertension                         | 23 (0.1)        | 717 (0.3)     | 727 (0.8)    | 1380 (2.6)   |
| Prior stillbirth /neonatal death             | 130 (0.6)       | 1894 (0.8)    | 979 (1.2)    | 791 (1.5)    |
| IVF conception <sup>b</sup>                  | 496 (2.2)       | 6835 (3.0)    | 2579 (3.1)   | 1639 (3.0)   |
| Multiple gestation                           |                 |               |              |              |
| Twins                                        | 253 (1.1)       | 3318 (1.4)    | 1340 (1.6)   | 895 (1.7)    |
| Triplets/Quadruplets <sup>d</sup>            | <5 (0)          | 34 (0)        | 26 (0)       | 19 (0)       |
| Bleeding < 20 weeks                          | 483 (2.2)       | 4116 (1.8)    | 1572 (1.9)   | 1166 (2.2)   |
| Antepartum bleeding/hemorrhage (≥ 20 weeks)  | 374 (1.7)       | 3352 (1.5)    | 1227 (1.5)   | 706 (1.3)    |
| Intrauterine Growth Restriction <sup>c</sup> | 987 (4.4)       | 5445 (2.4)    | 1472 (1.8)   | 953 (1.8)    |
| Gestational Hypertension                     | 547 (2.4)       | 8551 (3.7)    | 5694 (6.8)   | 6332 (11.7)  |
| Gestational Diabetes                         | 1680 (7.5)      | 19492 (8.4)   | 11548 (13.8) | 11452 (21.1) |

## Pre-pregnancy BMI and early- and late-onset HELLP syndrome

|                             |                 |               |              |              |
|-----------------------------|-----------------|---------------|--------------|--------------|
| Proteinuria                 | 161 (0.7)       | 2236 (1.0)    | 1267 (1.5)   | 1337 (2.5)   |
| Alcohol use                 | 192 (0.9)       | 2240 (1.0)    | 944 (1.1)    | 786 (1.5)    |
| Substance use               | 1118 (5.0)      | 8099 (3.5)    | 3514 (4.2)   | 2970 (5.5)   |
| Smoking                     | 1727 (7.7)      | 12943 (5.6)   | 6155 (7.3)   | 5576 (10.3)  |
| Gestational age at delivery |                 |               |              |              |
| (weeks)                     |                 |               |              |              |
| 20-27                       | 102 (0.5)       | 881 (0.4)     | 393 (0.5)    | 358 (0.7)    |
| 28-33                       | 387 (1.7)       | 3423 (1.5)    | 1473 (1.8)   | 1158 (2.1)   |
| 34-36                       | 1620 (7.2)      | 15119 (6.5)   | 6142 (7.3)   | 4680 (8.6)   |
| 37-41                       | 20076<br>(89.7) | 209831 (90.6) | 75017 (89.5) | 47448 (87.6) |
| ≥ 42                        | 207 (0.9)       | 2263 (1.0)    | 839 (1.0)    | 524 (1.0)    |

552 <sup>a</sup>Data shown as n(%)

553 <sup>b</sup>IVF = in vitro fertilization

554 <sup>c</sup>Ultrasound diagnosed intra-uterine growth restriction (IUGR)

555 <sup>d</sup>Information on cell numbers <5 was suppressed due to confidentiality reasons.

556 **Table 2. Rates of early-onset and late-onset HELLP syndrome per 1000 ongoing**  
 557 **pregnancies by maternal demographic and clinical characteristics; British Columbia,**  
 558 **2008/09-2019/20**

|                            | Early-onset<br>HELLP<br>syndrome | Late-onset<br>HELLP<br>syndrome | Overall   |
|----------------------------|----------------------------------|---------------------------------|-----------|
| Pre-pregnancy BMI category |                                  |                                 |           |
| Underweight                | 8 (0.4)                          | 35 (1.6)                        | 43 (1.9)  |
| Normal weight              | 125 (0.5)                        | 462 (2.0)                       | 587 (2.5) |
| Overweight                 | 73 (0.9)                         | 199 (2.4)                       | 272 (3.2) |
| Obese                      | 69 (1.3)                         | 145 (2.8)                       | 214 (4.0) |
| Maternal age (years)       |                                  |                                 |           |
| < 25                       | 30 (0.6)                         | 97 (2.1)                        | 127 (2.7) |

## Pre-pregnancy BMI and early- and late-onset HELLP syndrome

|                                               |           |            |            |
|-----------------------------------------------|-----------|------------|------------|
| 25-34                                         | 158 (0.6) | 512 (2.1)  | 670 (2.7)  |
| ≥ 35                                          | 87 (0.9)  | 232 (2.4)  | 319 (3.3)  |
| Nullipara                                     | 188 (1.0) | 629 (3.4)  | 817 (4.3)  |
| Pre-existing diabetes                         | 6 (2.5)   | 14 (6.3)   | 20 (8.3)   |
| Chronic hypertension                          | 19 (6.7)  | 20 (7.7)   | 39 (13.7)  |
| Prior stillbirth /neonatal death <sup>a</sup> | <5 (<1.0) | <5 (<1.0)  | 5 (1.3)    |
| IVF conception <sup>b</sup>                   | 19 (1.6)  | 73 (6.7)   | 92 (8.0)   |
| Multiple gestation                            | 33 (5.6)  | 91 (19.3)  | 124 (21.1) |
| Bleeding (< 20 weeks)                         | 12 (1.6)  | 10 (1.5)   | 22 (3.0)   |
| Antepartum Bleeding/hemorrhage (≥ 20 weeks)   | 15 (2.7)  | 12 (2.5)   | 27 (4.8)   |
| Alcohol use <sup>a</sup>                      | <5 (<1.0) | <11 (<2.7) | 12 (2.9)   |
| Substance use                                 | 14 (0.9)  | 25 (1.6)   | 39 (2.5)   |
| Smoking                                       | 14 (0.5)  | 36 (1.4)   | 50 (1.9)   |

559 <sup>a</sup>Information on cell numbers <5 was suppressed due to confidentiality reasons. Other  
 560 numbers were suppressed if needed to avoid back-calculation from the total

561 <sup>b</sup>IVF = in vitro fertilization

562

## Pre-pregnancy BMI and early- and late-onset HELLP syndrome

563 **Table 3. Adjusted hazard ratios for early-onset and late-onset HELLP syndrome with**  
 564 **95% confidence intervals; British Columbia, 2008/09-2019/20**

|                                                   | Overall<br>AHR (95% CI) <sup>a</sup> | Early-onset<br>HELLP<br>AHR (95% CI) | Late-onset HELLP<br>AHR (95% CI) | P-<br>value <sup>b</sup> |
|---------------------------------------------------|--------------------------------------|--------------------------------------|----------------------------------|--------------------------|
| <b>Pre-pregnancy BMI category</b>                 |                                      |                                      |                                  |                          |
| Underweight                                       | 0.79 (0.58-1.07)                     | 0.67 (0.33-1.38)                     | 0.82 (0.58-1.16)                 | 0.628                    |
| Normal weight                                     | Ref                                  | Ref                                  | Ref                              | Ref                      |
| Overweight                                        | 1.34 (1.16-1.55)                     | 1.63 (1.22-2.18)                     | 1.26 (1.07-1.49)                 | 0.129                    |
| Obese                                             | 1.65 (1.41-1.94)                     | 2.24 (1.65-3.04)                     | 1.48 (1.23-1.80)                 | 0.025                    |
| <b>Maternal age (years)</b>                       |                                      |                                      |                                  |                          |
| < 25                                              | 0.92 (0.76-1.12)                     | 0.92 (0.62-1.38)                     | 0.92 (0.74-1.15)                 | 0.998                    |
| 25-34                                             | Ref                                  | Ref                                  | Ref                              | Ref                      |
| ≥ 35                                              | 1.27 (1.11-1.47)                     | 1.39 (1.06-1.83)                     | 1.23 (1.05-1.45)                 | 0.445                    |
| Nullipara                                         | 2.93 (2.56-3.36)                     | 2.56 (1.97-3.33)                     | 3.09 (2.63-3.63)                 | 0.229                    |
| Pre-existing diabetes                             | 2.40 (1.51-3.80)                     | 1.64 (0.71-3.81)                     | 2.88 (1.66-5.00)                 | 0.273                    |
| Chronic hypertension                              | 3.93 (2.80-5.51)                     | 5.95 (3.62-9.79)                     | 2.92 (1.83-4.66)                 | 0.041                    |
| Prior stillbirth/neonatal death <sup>c</sup>      | 0.88 (0.36-2.13)                     | N/A                                  | N/A                              | N/A                      |
| IVF conception <sup>d</sup>                       | 1.21 (0.95-1.55)                     | 0.83 (0.50-1.41)                     | 1.37 (1.04-1.80)                 | 0.101                    |
| Multiple gestation                                | 13.66 (11.06-<br>16.87)              | 8.31 (5.59-<br>12.35)                | 17.81 (13.89-<br>22.83)          | 0.001                    |
| Bleeding at < 20 weeks                            | 0.95 (0.62-1.45)                     | 1.89 (1.05-3.39)                     | 0.60 (0.32-1.12)                 | 0.008                    |
| Antepartum bleeding or<br>hemorrhage (≥ 20 weeks) | 2.10 (1.43-3.08)                     | 3.75 (2.22-6.35)                     | 1.37 (0.77-2.43)                 | 0.011                    |
| Alcohol use <sup>e</sup>                          | 1.07 (0.60-1.90)                     | N/A                                  | N/A                              | N/A                      |
| Substance use                                     | 0.98 (0.70-1.36)                     | 1.38 (0.78-2.42)                     | 0.84 (0.56-1.27)                 | 0.166                    |
| Smoking                                           | 0.71 (0.53-0.96)                     | 0.70 (0.40-1.23)                     | 0.71 (0.50-1.01)                 | 0.963                    |

565 <sup>a</sup>AHR = adjusted hazard ratio, with 95% confidence interval in parentheses, were obtained from  
 566 the Cox model that included all variables in the table.



1 Pre-pregnancy BMI and early- and late-onset HELLP syndrome  
2  
3  
4

5 567 <sup>b</sup>p-value for interaction with early- vs late-onset HELLP syndrome.

6  
7 568 <sup>c</sup>N/A = not applicable. We did not examine differences by early- vs late-onset for prior  
8 569 stillbirth/neonatal death or alcohol use due to small sample size.

9  
10 570 <sup>d</sup>IVF = in vitro fertilization  
11  
12 571

13  
14  
15 572

16  
17  
18 573

19  
20  
21  
22 574

23  
24  
25 575

26  
27  
28  
29 576 **Figure legend**

30  
31  
32 577

33  
34  
35 578 **Figure 1.** Gestational-age specific rates of HELLP syndrome for each BMI category

36  
37  
38  
39 579 (Panel A); and log-transformed rates (Panel B). Rates from 40 to 45 weeks were

40  
41  
42  
43 580 combined. Splines with 95% confidence intervals were fitted by the generalized additive

44  
45  
46 581 model (“gam”) smoothing method.  
47  
48

49  
50 582

51  
52  
53 583 **Supplemental Figure 1.** Flowchart of study sample selection.  
54  
55  
56  
57  
58  
59  
60

## Pre-pregnancy BMI and early- and late-onset HELLP syndrome

584

585

586

587

588

589

590

591

592

593

594

595

596

597

598

1  
2  
3  
4  
5  
6  
7  
8  
9  
10  
11  
12  
13  
14  
15  
16  
17  
18  
19  
20  
21  
22  
23  
24  
25  
26  
27  
28  
29  
30  
31  
32  
33  
34  
35  
36  
37  
38  
39  
40  
41  
42  
43  
44  
45  
46  
47  
48  
49  
50  
51  
52  
53  
54  
55  
56  
57  
58  
59  
60

Pre-pregnancy BMI and early- and late-onset HELLP syndrome

599  
600

For peer review only

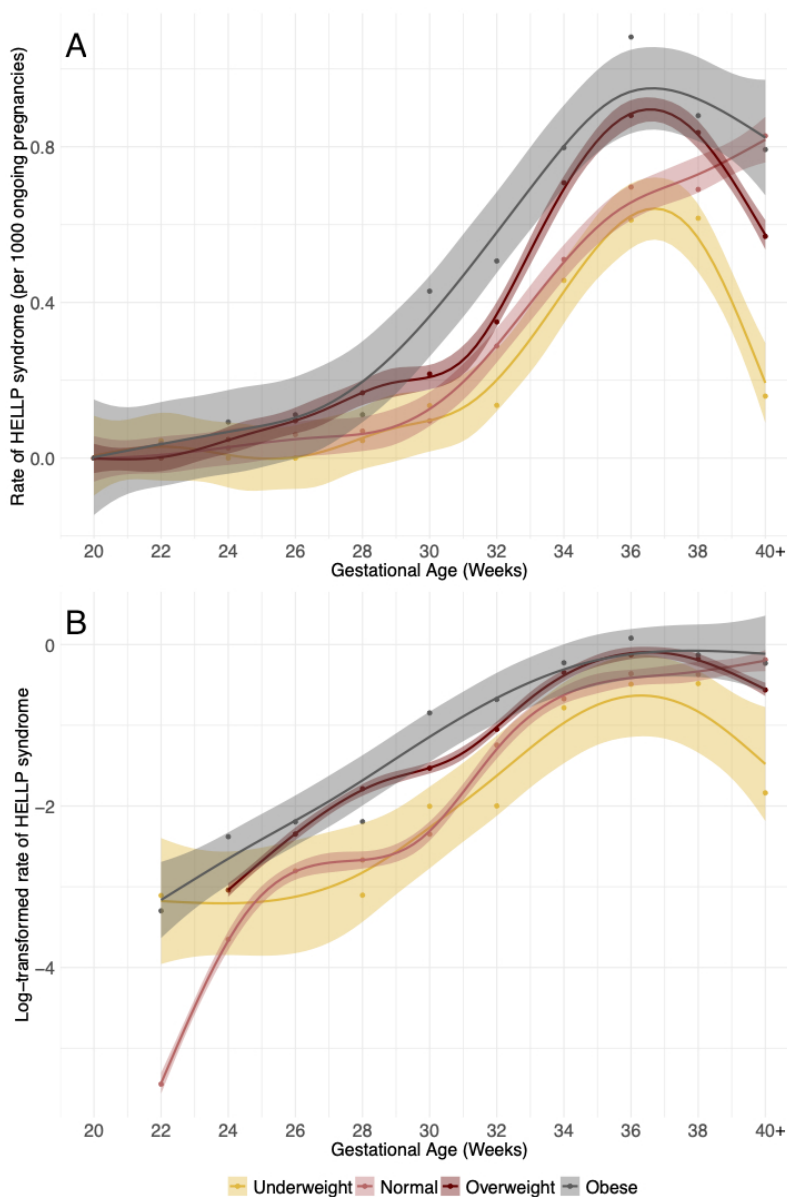

Figure 1. Gestational-age specific rates of HELLP syndrome for each BMI category (Panel A); and log-transformed rates (Panel B). Rates from 40 to 45 weeks were combined. Splines with 95% confidence intervals were fitted by the generalized additive model ("gam") smoothing method.

254x381mm (72 x 72 DPI)

1  
2  
3  
4  
5  
6  
7  
8  
9  
10  
11  
12  
13  
14  
15  
16  
17  
18  
19  
20  
21  
22  
23  
24  
25  
26  
27  
28  
29  
30  
31  
32  
33  
34  
35  
36  
37  
38  
39  
40  
41  
42  
43  
44  
45  
46  
47  
48  
49  
50  
51  
52  
53  
54  
55  
56  
57  
58  
59  
60



Supplemental Figure 1. Flowchart of study sample selection.

443x288mm (59 x 59 DPI)

## Supplementary tables

Supplemental Table 1. Definitions and sources of variables

|                       | Definition                                                                                                                                                                       | Source |
|-----------------------|----------------------------------------------------------------------------------------------------------------------------------------------------------------------------------|--------|
| Maternal age (years)  | Mother's age (in years) calculated at date of delivery.                                                                                                                          | BCPDR  |
| Nullipara             | Mother has never delivered a baby of at least 500 grams birth weight or at least 20 weeks gestation in a previous pregnancy.                                                     | BCPDR  |
| Pre-existing diabetes | Pre-existing diabetes mellitus Type 1 or Type 2, insulin used;                                                                                                                   | BCPDR  |
|                       | or 'E10','E11', 'O245','O246','O247'                                                                                                                                             | ICD-10 |
| Chronic hypertension  | 'O10','O11'                                                                                                                                                                      | ICD-10 |
| Prior stillbirth      | Mother had at least one prior live born infant, who died within the first 28 days of life.                                                                                       | BCPDR  |
| /neonatal death       | Mother had at least one prior stillbirth or intrauterine death documented.                                                                                                       |        |
| IVF conception        | Mother had in-vitro fertilization to achieve the current pregnancy.                                                                                                              | BCPDR  |
| Multiple gestation    | The incremental sequence number of babies born from the current pregnancy. Should be used with multiple_birth_count. Along with mother_id, required to link to MULTIPLE_LABOURS. | BCPDR  |

1  
2  
3  
4  
5  
6  
7  
8  
9  
10  
11  
12  
13  
14  
15  
16  
17  
18  
19  
20  
21  
22  
23  
24  
25  
26  
27  
28  
29  
30  
31  
32  
33  
34  
35  
36  
37  
38  
39  
40  
41  
42  
43  
44  
45  
46  
47

|                                              |                                                                                                                              |       |
|----------------------------------------------|------------------------------------------------------------------------------------------------------------------------------|-------|
| Antepartum bleeding                          |                                                                                                                              |       |
| < 20 weeks                                   | Mother had any antepartum bleeding in pregnancy < 20 weeks gestation.                                                        | BCPDR |
| Antepartum bleeding or hemorrhage ≥ 20 weeks |                                                                                                                              |       |
|                                              | Mother had any antepartum hemorrhage or bleeding in pregnancy ≥ 20 weeks gestation, including bleeding from cervical polyps. | BCPDR |
| Intrauterine Growth Restriction <sup>a</sup> |                                                                                                                              |       |
|                                              | Health care provider identified intrauterine growth restriction (IUGR) during the antenatal period.                          | BCPDR |
|                                              | Baby may or may not be appropriately grown at birth.                                                                         |       |
| Gestational Hypertension                     |                                                                                                                              |       |
|                                              | Care provider diagnosed mother with gestational hypertension during the current pregnancy.                                   | BCPDR |
| Gestational Diabetes                         |                                                                                                                              |       |
|                                              | Gestational diabetes, insulin dependent.                                                                                     | BCPDR |
|                                              | Gestational diabetes, non-insulin dependent.                                                                                 |       |
| Proteinuria                                  |                                                                                                                              |       |
|                                              | Care provider diagnosed proteinuria (>+1g/L) during the current pregnancy.                                                   | BCPDR |
| Alcohol use                                  |                                                                                                                              |       |
|                                              | Care provider lists mother’s use of alcohol as a risk factor in this pregnancy.                                              | BCPDR |

|                                                                           |                                                                                                                                                                                                |       |
|---------------------------------------------------------------------------|------------------------------------------------------------------------------------------------------------------------------------------------------------------------------------------------|-------|
|                                                                           | Mother used any of the following substances at any time during the current pregnancy:                                                                                                          |       |
| Substance use                                                             | heroin/opioids, cocaine, methadone, solvents, or marijuana; OR care provider lists use of prescription, 'other', or unknown other drug as a risk to the pregnancy.                             | BCPDR |
| Smoking                                                                   | Mother smoked tobacco products during pregnancy.                                                                                                                                               | BCPDR |
| Gestational age at delivery                                               | Algorithm-based estimate of gestational age at delivery. Uses last menstrual period, first ultrasound (<20 weeks), clinical estimate from newborn exam, and documentation from maternal chart. | BCPDR |
| HELLP syndrome                                                            | Mother was diagnosed with HELLP Syndrome (H-hemolysis, EL-elevated liver enzymes, LP-low platelet count)                                                                                       | BCPDR |
| <sup>a</sup> Ultrasound diagnosed intra-uterine growth restriction (IUGR) |                                                                                                                                                                                                |       |



Supplemental Table 2. Rates of HELLP syndrome by Body-Mass-Index category and hazard ratios with 95% confidence intervals

|                                          | Underweight      | Normal BMI | Overweight       | Obese            |
|------------------------------------------|------------------|------------|------------------|------------------|
| <i>All pregnancies</i>                   |                  |            |                  |                  |
| N cases (rate per thousand) <sup>a</sup> | 43 (1.9)         | 587 (2.5)  | 272 (3.2)        | 214 (4.0)        |
| Crude HR <sup>b</sup>                    | 0.78 (0.57-1.06) | Ref        | 1.29 (1.12-1.49) | 1.62 (1.39-1.90) |
| <i>Early-onset HELLP (&lt; 34 wks)</i>   |                  |            |                  |                  |
| N cases (rate per thousand) <sup>a</sup> | 8 (0.4)          | 125 (0.5)  | 73 (0.9)         | 69 (1.3)         |
| Crude HR <sup>b</sup>                    | 0.66 (0.32-1.35) | Ref        | 1.62 (1.21-2.16) | 2.37 (1.77-3.18) |
| <i>Late-onset HELLP (≥ 34 wks)</i>       |                  |            |                  |                  |
| N cases (rate per thousand) <sup>a</sup> | 35 (1.6)         | 462 (2.0)  | 199 (2.4)        | 145 (2.8)        |
| Crude HR <sup>b</sup>                    | 0.81 (0.57-1.14) | Ref        | 1.21 (1.02-1.42) | 1.42 (1.17-1.71) |

<sup>a</sup>Rates are per 1000 ongoing pregnancies at 20 weeks (early-onset HELLP) and at 34 weeks gestation (late-onset HELLP).

<sup>b</sup>HR = hazard ratio, with 95% confidence interval in parentheses, unless otherwise specified

Supplemental Table 3. Maternal demographic and clinical characteristics by early- vs late-onset HELLP syndrome; British Columbia, 2008/09-2019/20<sup>a</sup>

|                            | Early-onset HELLP | Late-onset HELLP |
|----------------------------|-------------------|------------------|
|                            | n =275            | n = 841          |
| Pre-pregnancy BMI category |                   |                  |
| Underweight                | 8 (2.9)           | 35 (4.2)         |
| Normal weight              | 125 (45.5)        | 462 (54.9)       |
| Overweight                 | 73 (26.6)         | 199 (23.7)       |
| Obese                      | 69 (25.1)         | 145 (17.2)       |
| Maternal age (years)       |                   |                  |
| < 25                       | 30 (10.9)         | 97 (11.5)        |
| 25-34                      | 158 (57.5)        | 512 (60.9)       |
| ≥ 35                       | 87 (31.6)         | 232 (27.6)       |
| Nullipara                  | 188 (68.4)        | 629 (74.8)       |
| Chronic diabetes           | 6 (2.2)           | 14 (1.7)         |

1  
2  
3  
4  
5  
6  
7  
8  
9  
10  
11  
12  
13  
14  
15  
16  
17  
18  
19  
20  
21  
22  
23  
24  
25  
26  
27  
28  
29  
30  
31  
32  
33  
34  
35  
36  
37  
38  
39  
40  
41  
42  
43  
44  
45  
46  
47

|                                               |           |           |
|-----------------------------------------------|-----------|-----------|
| Chronic hypertension                          | 19 (6.9)  | 20 (2.4)  |
| Prior stillbirth /neonatal death <sup>b</sup> | <5 (<1.8) | <5 (<0.5) |
| IVF conception <sup>c</sup>                   | 19 (6.9)  | 73 (8.7)  |
| Multiple gestation                            | 33 (12.0) | 91 (10.8) |
| Bleeding (< 20 weeks)                         | 12 (4.4)  | 10 (1.2)  |
| Antepartum bleeding/hemorrhage (≥ 20 weeks)   | 15 (5.5)  | 12 (1.4)  |
| Alcohol use <sup>b</sup>                      | <5 (<1.8) | 10 (1.2)  |
| Substance use                                 | 14 (5.1)  | 25 (3.0)  |
| Smoking                                       | 14 (5.1)  | 36 (4.3)  |

<sup>a</sup>Data shown as n(%)

<sup>b</sup>Information on cell numbers <5 was suppressed due to confidentiality reasons.

<sup>c</sup>IVF = in vitro fertilization

Supplemental Table 4. Cases of HELLP syndrome at each gestational age (rate per 1000 ongoing pregnancies)<sup>a</sup>

| Gestational age<br>(weeks) | Underweight<br>n = 22,392 | Normal BMI<br>n = 231,517 | Overweight<br>n = 83,864 | Obese<br>n = 54,168 |
|----------------------------|---------------------------|---------------------------|--------------------------|---------------------|
| 20-21                      | <5/22392 (<0.22)          | <5/231517 (<0.02)         | <5/83864 (<0.06)         | <5/54168 (<0.09)    |
| 22-23                      | <5/22379 (<0.22)          | <5/231351 (<0.02)         | <5/83796 (<0.06)         | <5/54108 (<0.09)    |
| 24-25                      | <5/22356 (<0.22)          | 6/231174 (0.03)           | <5/83720 (<0.06)         | 5/54023 (0.09)      |
| 26-27                      | <5/22332 (<0.22)          | 14/230958 (0.06)          | 8/83609 (0.10)           | 6/53926 (0.11)      |
| 28-29                      | <5/22289 (0.04)           | 16/230635 (0.07)          | 14/83471 (0.17)          | 6/53810 (0.11)      |
| 30-31                      | <5/22232 (0.13)           | 22/230136 (0.10)          | 18/83269 (0.22)          | 23/53631 (0.43)     |
| 32-33                      | <5/22133 (0.14)           | 66/229249 (0.29)          | 29/82870 (0.35)          | 27/53303 (0.51)     |
| 34-35                      | 10/21902 (0.46)           | 116/227212 (0.51)         | 58/81998 (0.71)          | 42/52652 (0.80)     |
| 36-37                      | 13/21247 (0.61)           | 154/221075 (0.70)         | 70/79515 (0.88)          | 55/50825 (1.08)     |
| 38-39                      | 11/17845 (0.62)           | 131/189757 (0.69)         | 56/66951 (0.84)          | 36/40911 (0.88)     |
| ≥ 40                       | <5/6278 (<0.80)           | 61/73662 (0.83)           | 15/26327 (0.57)          | 12/15135 (0.79)     |

<sup>a</sup>Information on cell numbers <5 was suppressed due to confidentiality reasons.

1  
2  
3  
4  
5  
6  
7  
8  
9  
10  
11  
12  
13  
14  
15  
16  
17  
18  
19  
20  
21  
22  
23  
24  
25  
26  
27  
28  
29  
30  
31  
32  
33  
34  
35  
36  
37  
38  
39  
40  
41  
42  
43  
44  
45  
46  
47

Supplemental Table 5. Demographic and clinical characteristics of women missing pre-pregnancy BMI, live births and stillbirths, British Columbia, 200/09-2019/20<sup>a</sup>

|                                  | BMI not missing | BMI missing  |
|----------------------------------|-----------------|--------------|
|                                  | n = 391,941     | n = 132,536  |
| Maternal age (years)             |                 |              |
| < 25                             | 47030 (12.0)    | 20134 (15.2) |
| 25-34                            | 247268 (63.1)   | 78660 (59.4) |
| ≥ 35                             | 97643 (24.9)    | 33742 (25.5) |
| Nullipara                        | 189513 (48.4)   | 53789 (40.6) |
| Pre-existing diabetes            | 2397 (0.6)      | 913 (0.7)    |
| Chronic hypertension             | 2847 (0.7)      | 890 (0.7)    |
| Prior stillbirth /neonatal death | 3794 (1.0)      | 1734 (1.3)   |
| IVF conception <sup>b</sup>      | 11549 (3.0)     | 3877 (2.9)   |
| Multiple gestation               |                 |              |
| Twins                            | 5806 (1.5)      | 2478 (1.9)   |

|    |                                              |              |              |
|----|----------------------------------------------|--------------|--------------|
| 1  |                                              |              |              |
| 2  |                                              |              |              |
| 3  | Triplets/Quadruplets                         | 82 (0)       | 27 (0)       |
| 4  |                                              |              |              |
| 5  |                                              |              |              |
| 6  | Antepartum bleeding/hemorrhage               |              |              |
| 7  |                                              |              |              |
| 8  | < 20 weeks                                   | 7337 (1.9)   | 1813 (1.4)   |
| 9  |                                              |              |              |
| 10 | ≥ 20 weeks                                   | 5659 (1.4)   | 1496 (1.1)   |
| 11 |                                              |              |              |
| 12 |                                              |              |              |
| 13 | Intrauterine Growth Restriction <sup>c</sup> | 8857 (2.3)   | 2471 (1.9)   |
| 14 |                                              |              |              |
| 15 |                                              |              |              |
| 16 | Gestational Hypertension                     | 21124 (5.4)  | 6623 (5.0)   |
| 17 |                                              |              |              |
| 18 | Gestational Diabetes                         | 44172 (11.3) | 13248 (10.0) |
| 19 |                                              |              |              |
| 20 |                                              |              |              |
| 21 | Proteinuria                                  | 21124 (5.4)  | 6623 (5.0)   |
| 22 |                                              |              |              |
| 23 | Alcohol use                                  | 4162 (1.1)   | 1845 (1.4)   |
| 24 |                                              |              |              |
| 25 |                                              |              |              |
| 26 | Substance use                                | 15701 (4.0)  | 6758 (5.1)   |
| 27 |                                              |              |              |
| 28 | Smoking                                      | 26401 (6.7)  | 10435 (7.9)  |
| 29 |                                              |              |              |
| 30 |                                              |              |              |
| 31 | Second-hand smoke                            | 26319 (6.7)  | 7565 (5.7)   |
| 32 |                                              |              |              |

---

<sup>a</sup>Data shown as n(%)

<sup>b</sup>IVF = in vitro fertilization

<sup>c</sup>Ultrasound diagnosed intra-uterine growth restriction (IUGR)

1  
2  
3  
4  
5  
6  
7  
8  
9  
10  
11  
12  
13  
14  
15  
16  
17  
18  
19  
20  
21  
22  
23  
24  
25  
26  
27  
28  
29  
30  
31  
32  
33  
34  
35  
36  
37  
38  
39  
40  
41  
42  
43  
44  
45  
46  
47

**Supplemental Table 6. Hazard Ratios and 95% confidence intervals using imputed data for missing values of BMI**

|                                          | Underweight      | Normal BMI | Overweight       | Obese            |
|------------------------------------------|------------------|------------|------------------|------------------|
| <b>Early-onset HELLP (&lt; 34 wks)</b>   |                  |            |                  |                  |
| N cases (rate per thousand) <sup>a</sup> | 8 (0.4)          | 164 (0.5)  | 137 (0.9)        | 71 (1.3)         |
| Adjusted HR <sup>b</sup>                 | 0.76 (0.43-1.33) | Ref        | 1.54 (1.19-2.00) | 2.06 (1.53-2.78) |
| <b>Late-onset HELLP (≥ 34 wks)</b>       |                  |            |                  |                  |
| N cases (rate per thousand) <sup>a</sup> | 35 (1.6)         | 572 (1.9)  | 376 (2.6)        | 148 (2.8)        |
| Adjusted HR <sup>b</sup>                 | 0.96 (0.51-1.8)  | Ref        | 1.24 (0.92-1.66) | 1.46 (1.03-2.08) |

<sup>a</sup>Rates are per 1000 ongoing pregnancies at 20 weeks (early-onset HELLP syndrome) and at 34 weeks gestation (late-onset HELLP syndrome).

<sup>b</sup>HR = hazard ratio, with 95% confidence interval in parentheses, unless otherwise specified. Adjusted for nulliparity, maternal age, chronic diabetes, chronic hypertension, in vitro fertilization, antepartum bleeding/hemorrhage, gestational diabetes, alcohol, substance use, smoking during pregnancy, prior pregnancy outcomes, and multiple gestation.

## STROBE Statement—checklist of items that should be included in reports of observational studies

|                           | Item No. | Recommendation                                                                                                                                                                                                                                                                                                                                                                                                                                                         | Page No.   | Relevant text from manuscript                                                                                                                                                                                 |
|---------------------------|----------|------------------------------------------------------------------------------------------------------------------------------------------------------------------------------------------------------------------------------------------------------------------------------------------------------------------------------------------------------------------------------------------------------------------------------------------------------------------------|------------|---------------------------------------------------------------------------------------------------------------------------------------------------------------------------------------------------------------|
| <b>Title and abstract</b> | 1        | (a) Indicate the study's design with a commonly used term in the title or the abstract                                                                                                                                                                                                                                                                                                                                                                                 | Title page | "Title: Pre-pregnancy body mass index and other risk factors for early- and late-onset hemolysis, elevated liver enzymes, and low platelets (HELLP) syndrome: A population-based retrospective cohort study." |
|                           |          | (b) Provide in the abstract an informative and balanced summary of what was done and what was found                                                                                                                                                                                                                                                                                                                                                                    | 2-3        |                                                                                                                                                                                                               |
| <b>Introduction</b>       |          |                                                                                                                                                                                                                                                                                                                                                                                                                                                                        |            |                                                                                                                                                                                                               |
| Background/rationale      | 2        | Explain the scientific background and rationale for the investigation being reported                                                                                                                                                                                                                                                                                                                                                                                   | 4-5        | Lines 67-84                                                                                                                                                                                                   |
| Objectives                | 3        | State specific objectives, including any prespecified hypotheses                                                                                                                                                                                                                                                                                                                                                                                                       | 4-5        | Lines 85-90                                                                                                                                                                                                   |
| <b>Methods</b>            |          |                                                                                                                                                                                                                                                                                                                                                                                                                                                                        |            |                                                                                                                                                                                                               |
| Study design              | 4        | Present key elements of study design early in the paper                                                                                                                                                                                                                                                                                                                                                                                                                | 5-6        | Lines 92-122                                                                                                                                                                                                  |
| Setting                   | 5        | Describe the setting, locations, and relevant dates, including periods of recruitment, exposure, follow-up, and data collection                                                                                                                                                                                                                                                                                                                                        | 5-6        | Lines 92-122                                                                                                                                                                                                  |
| Participants              | 6        | (a) <i>Cohort study</i> —Give the eligibility criteria, and the sources and methods of selection of participants. Describe methods of follow-up<br><i>Case-control study</i> —Give the eligibility criteria, and the sources and methods of case ascertainment and control selection. Give the rationale for the choice of cases and controls<br><i>Cross-sectional study</i> —Give the eligibility criteria, and the sources and methods of selection of participants | 5-6        | Lines 92-122                                                                                                                                                                                                  |
|                           |          | (b) <i>Cohort study</i> —For matched studies, give matching criteria and number of exposed and unexposed<br><i>Case-control study</i> —For matched studies, give matching criteria and the number of controls per case                                                                                                                                                                                                                                                 | N/A        | N/A                                                                                                                                                                                                           |



1  
2  
3  
4  
5  
6  
7  
8  
9  
10

|                              |    |                                                                                                                                                                                         |     |                                                                  |
|------------------------------|----|-----------------------------------------------------------------------------------------------------------------------------------------------------------------------------------------|-----|------------------------------------------------------------------|
| Variables                    | 7  | Clearly define all outcomes, exposures, predictors, potential confounders, and effect modifiers.<br>Give diagnostic criteria, if applicable                                             | 5-7 | Lines 92-147                                                     |
| Data sources/<br>measurement | 8* | For each variable of interest, give sources of data and details of methods of assessment<br>(measurement). Describe comparability of assessment methods if there is more than one group | 31  | Supplemental Table 1.<br>Definitions and sources of<br>variables |
| Bias                         | 9  | Describe any efforts to address potential sources of bias                                                                                                                               | 6-7 | Lines 123 - 147                                                  |
| Study size                   | 10 | Explain how the study size was arrived at                                                                                                                                               | 6-7 | Lines 92-147                                                     |

Continued on next page

11  
12  
13  
14  
15  
16  
17  
18  
19  
20  
21  
22  
23  
24  
25  
26  
27  
28  
29  
30  
31  
32  
33  
34  
35  
36  
37  
38  
39  
40  
41  
42

For peer review only

43  
44  
45  
46

|                        |     |                                                                                                                                                                                                              |            |                        |
|------------------------|-----|--------------------------------------------------------------------------------------------------------------------------------------------------------------------------------------------------------------|------------|------------------------|
| Quantitative variables | 11  | Explain how quantitative variables were handled in the analyses. If applicable, describe which groupings were chosen and why                                                                                 | 6-7        | Lines 123 - 147        |
| Statistical methods    | 12  | (a) Describe all statistical methods, including those used to control for confounding                                                                                                                        | 6-7        | Lines 123 - 147        |
|                        |     | (b) Describe any methods used to examine subgroups and interactions                                                                                                                                          | 6-7        | Lines 123 - 147        |
|                        |     | (c) Explain how missing data were addressed                                                                                                                                                                  | 6-7        | Lines 123 - 147        |
|                        |     | (d) <i>Cohort study</i> —If applicable, explain how loss to follow-up was addressed                                                                                                                          | N/A        |                        |
|                        |     | <i>Case-control study</i> —If applicable, explain how matching of cases and controls was addressed                                                                                                           |            |                        |
|                        |     | <i>Cross-sectional study</i> —If applicable, describe analytical methods taking account of sampling strategy                                                                                                 |            |                        |
|                        |     | (e) Describe any sensitivity analyses                                                                                                                                                                        | 6-7        | Lines 123 - 147        |
| <b>Results</b>         |     |                                                                                                                                                                                                              |            |                        |
| Participants           | 13* | (a) Report numbers of individuals at each stage of study—eg numbers potentially eligible, examined for eligibility, confirmed eligible, included in the study, completing follow-up, and analysed            | 7-8        | Lines 149-164          |
|                        |     | (b) Give reasons for non-participation at each stage                                                                                                                                                         | 7-8        | Lines 149-164          |
|                        |     | (c) Consider use of a flow diagram                                                                                                                                                                           | 29         | Supplemental Figure 1  |
| Descriptive data       | 14* | (a) Give characteristics of study participants (eg demographic, clinical, social) and information on exposures and potential confounders                                                                     | 22-23, 7-8 | Table 1, Lines 149-164 |
|                        |     | (b) Indicate number of participants with missing data for each variable of interest                                                                                                                          | 7-8        | Lines 149-155          |
|                        |     | (c) <i>Cohort study</i> —Summarise follow-up time (eg, average and total amount)                                                                                                                             | 7-8        | Lines 149-155          |
| Outcome data           | 15* | <i>Cohort study</i> —Report numbers of outcome events or summary measures over time                                                                                                                          | 7-8        | Lines 149-164          |
|                        |     | <i>Case-control study</i> —Report numbers in each exposure category, or summary measures of exposure                                                                                                         |            |                        |
|                        |     | <i>Cross-sectional study</i> —Report numbers of outcome events or summary measures                                                                                                                           |            |                        |
| Main results           | 16  | (a) Give unadjusted estimates and, if applicable, confounder-adjusted estimates and their precision (eg, 95% confidence interval). Make clear which confounders were adjusted for and why they were included | 8-9        | Lines 165-212          |
|                        |     | (b) Report category boundaries when continuous variables were categorized                                                                                                                                    | 5          | Lines 105-106          |
|                        |     | (c) If relevant, consider translating estimates of relative risk into absolute risk for a meaningful time period                                                                                             | N/A        |                        |

Continued on next page

|                          |    |                                                                                                                                                                            |       |               |
|--------------------------|----|----------------------------------------------------------------------------------------------------------------------------------------------------------------------------|-------|---------------|
| Other analyses           | 17 | Report other analyses done—eg analyses of subgroups and interactions, and sensitivity analyses                                                                             | 10    | Lines 213-216 |
| <b>Discussion</b>        |    |                                                                                                                                                                            |       |               |
| Key results              | 18 | Summarise key results with reference to study objectives                                                                                                                   | 11    | Lines 220-229 |
| Limitations              | 19 | Discuss limitations of the study, taking into account sources of potential bias or imprecision. Discuss both direction and magnitude of any potential bias                 | 13-15 | Lines 280-307 |
| Interpretation           | 20 | Give a cautious overall interpretation of results considering objectives, limitations, multiplicity of analyses, results from similar studies, and other relevant evidence | 11-13 | Lines 230-279 |
| Generalisability         | 21 | Discuss the generalisability (external validity) of the study results                                                                                                      | 13-15 | Lines 280-307 |
| <b>Other information</b> |    |                                                                                                                                                                            |       |               |
| Funding                  | 22 | Give the source of funding and the role of the funders for the present study and, if applicable, for the original study on which the present article is based              |       | Title page    |

\*Give information separately for cases and controls in case-control studies and, if applicable, for exposed and unexposed groups in cohort and cross-sectional studies.

**Note:** An Explanation and Elaboration article discusses each checklist item and gives methodological background and published examples of transparent reporting. The STROBE checklist is best used in conjunction with this article (freely available on the Web sites of PLoS Medicine at <http://www.plosmedicine.org/>, Annals of Internal Medicine at <http://www.annals.org/>, and Epidemiology at <http://www.epidem.com/>). Information on the STROBE Initiative is available at [www.strobe-statement.org](http://www.strobe-statement.org).
