# Supplementary material for: Prepregnancy body mass index and other risk factors for early-onset and late-onset haemolysis, elevated liver enzymes and low platelets (HELLP) syndrome: a population-based retrospective cohort study in British Columbia, Canada
Source: HighWire-hosted journal article supplement (doi:10.1136/bmjopen-2023-079131), 2024-03-01
Supplement: bmjopen-2023-079131supp003_data_supplement.pdf [file bmjopen-2023-079131supp003_data_supplement.pdf]

1  
2  
3  
4  
5  
6  
7  
8  
9  
10  
11  
12  
13  
14  
15  
16  
17  
18  
19  
20  
21  
22  
23  
24  
25  
26  
27  
28  
29  
30  
31  
32  
33  
34  
35  
36  
37  
38  
39  
40  
41  
42  
43  
44  
45  
46  
47  
48  
49  
50

## STROBE Statement—checklist of items that should be included in reports of observational studies

|                           | Item No. | Recommendation                                                                                                                                                                                                                                                                                                                                                                                                                                                         | Page No.   | Relevant text from manuscript                                                                                                                                                                                 |
|---------------------------|----------|------------------------------------------------------------------------------------------------------------------------------------------------------------------------------------------------------------------------------------------------------------------------------------------------------------------------------------------------------------------------------------------------------------------------------------------------------------------------|------------|---------------------------------------------------------------------------------------------------------------------------------------------------------------------------------------------------------------|
| <b>Title and abstract</b> | 1        | (a) Indicate the study's design with a commonly used term in the title or the abstract                                                                                                                                                                                                                                                                                                                                                                                 | Title page | "Title: Pre-pregnancy body mass index and other risk factors for early- and late-onset hemolysis, elevated liver enzymes, and low platelets (HELLP) syndrome: A population-based retrospective cohort study." |
|                           |          | (b) Provide in the abstract an informative and balanced summary of what was done and what was found                                                                                                                                                                                                                                                                                                                                                                    | 2-3        |                                                                                                                                                                                                               |
| <b>Introduction</b>       |          |                                                                                                                                                                                                                                                                                                                                                                                                                                                                        |            |                                                                                                                                                                                                               |
| Background/rationale      | 2        | Explain the scientific background and rationale for the investigation being reported                                                                                                                                                                                                                                                                                                                                                                                   | 4-5        | Lines 67-84                                                                                                                                                                                                   |
| Objectives                | 3        | State specific objectives, including any prespecified hypotheses                                                                                                                                                                                                                                                                                                                                                                                                       | 4-5        | Lines 85-90                                                                                                                                                                                                   |
| <b>Methods</b>            |          |                                                                                                                                                                                                                                                                                                                                                                                                                                                                        |            |                                                                                                                                                                                                               |
| Study design              | 4        | Present key elements of study design early in the paper                                                                                                                                                                                                                                                                                                                                                                                                                | 5-6        | Lines 92-122                                                                                                                                                                                                  |
| Setting                   | 5        | Describe the setting, locations, and relevant dates, including periods of recruitment, exposure, follow-up, and data collection                                                                                                                                                                                                                                                                                                                                        | 5-6        | Lines 92-122                                                                                                                                                                                                  |
| Participants              | 6        | (a) <i>Cohort study</i> —Give the eligibility criteria, and the sources and methods of selection of participants. Describe methods of follow-up<br><i>Case-control study</i> —Give the eligibility criteria, and the sources and methods of case ascertainment and control selection. Give the rationale for the choice of cases and controls<br><i>Cross-sectional study</i> —Give the eligibility criteria, and the sources and methods of selection of participants | 5-6        | Lines 92-122                                                                                                                                                                                                  |
|                           |          | (b) <i>Cohort study</i> —For matched studies, give matching criteria and number of exposed and unexposed<br><i>Case-control study</i> —For matched studies, give matching criteria and the number of controls per case                                                                                                                                                                                                                                                 | N/A        | N/A                                                                                                                                                                                                           |

|    |                              |    |                                                                                                                                                                                         |     |                                                                  |
|----|------------------------------|----|-----------------------------------------------------------------------------------------------------------------------------------------------------------------------------------------|-----|------------------------------------------------------------------|
| 1  |                              |    |                                                                                                                                                                                         |     |                                                                  |
| 2  | Variables                    | 7  | Clearly define all outcomes, exposures, predictors, potential confounders, and effect modifiers.<br>Give diagnostic criteria, if applicable                                             | 5-7 | Lines 92-147                                                     |
| 3  |                              |    |                                                                                                                                                                                         |     |                                                                  |
| 4  |                              |    |                                                                                                                                                                                         |     |                                                                  |
| 5  | Data sources/<br>measurement | 8* | For each variable of interest, give sources of data and details of methods of assessment<br>(measurement). Describe comparability of assessment methods if there is more than one group | 31  | Supplemental Table 1.<br>Definitions and sources of<br>variables |
| 6  |                              |    |                                                                                                                                                                                         |     |                                                                  |
| 7  |                              |    |                                                                                                                                                                                         |     |                                                                  |
| 8  | Bias                         | 9  | Describe any efforts to address potential sources of bias                                                                                                                               | 6-7 | Lines 123 - 147                                                  |
| 9  |                              |    |                                                                                                                                                                                         |     |                                                                  |
| 10 | Study size                   | 10 | Explain how the study size was arrived at                                                                                                                                               | 6-7 | Lines 92-147                                                     |
| 11 | Continued on next page       |    |                                                                                                                                                                                         |     |                                                                  |

For peer review only

|    |                        |     |                                                                                                                                                                                                              |            |                        |
|----|------------------------|-----|--------------------------------------------------------------------------------------------------------------------------------------------------------------------------------------------------------------|------------|------------------------|
| 1  |                        |     |                                                                                                                                                                                                              |            |                        |
| 2  | Quantitative variables | 11  | Explain how quantitative variables were handled in the analyses. If applicable, describe which groupings were chosen and why                                                                                 | 6-7        | Lines 123 - 147        |
| 3  |                        |     |                                                                                                                                                                                                              |            |                        |
| 4  | Statistical methods    | 12  | (a) Describe all statistical methods, including those used to control for confounding                                                                                                                        | 6-7        | Lines 123 - 147        |
| 5  |                        |     | (b) Describe any methods used to examine subgroups and interactions                                                                                                                                          | 6-7        | Lines 123 - 147        |
| 6  |                        |     | (c) Explain how missing data were addressed                                                                                                                                                                  | 6-7        | Lines 123 - 147        |
| 7  |                        |     | (d) <i>Cohort study</i> —If applicable, explain how loss to follow-up was addressed                                                                                                                          | N/A        |                        |
| 8  |                        |     | <i>Case-control study</i> —If applicable, explain how matching of cases and controls was addressed                                                                                                           |            |                        |
| 9  |                        |     | <i>Cross-sectional study</i> —If applicable, describe analytical methods taking account of sampling strategy                                                                                                 |            |                        |
| 10 |                        |     | (e) Describe any sensitivity analyses                                                                                                                                                                        | 6-7        | Lines 123 - 147        |
| 11 |                        |     |                                                                                                                                                                                                              |            |                        |
| 12 |                        |     |                                                                                                                                                                                                              |            |                        |
| 13 |                        |     |                                                                                                                                                                                                              |            |                        |
| 14 |                        |     |                                                                                                                                                                                                              |            |                        |
| 15 | <b>Results</b>         |     |                                                                                                                                                                                                              |            |                        |
| 16 | Participants           | 13* | (a) Report numbers of individuals at each stage of study—eg numbers potentially eligible, examined for eligibility, confirmed eligible, included in the study, completing follow-up, and analysed            | 7-8        | Lines 149-164          |
| 17 |                        |     | (b) Give reasons for non-participation at each stage                                                                                                                                                         | 7-8        | Lines 149-164          |
| 18 |                        |     | (c) Consider use of a flow diagram                                                                                                                                                                           | 29         | Supplemental Figure 1  |
| 19 |                        |     |                                                                                                                                                                                                              |            |                        |
| 20 | Descriptive data       | 14* | (a) Give characteristics of study participants (eg demographic, clinical, social) and information on exposures and potential confounders                                                                     | 22-23, 7-8 | Table 1, Lines 149-164 |
| 21 |                        |     | (b) Indicate number of participants with missing data for each variable of interest                                                                                                                          | 7-8        | Lines 149-155          |
| 22 |                        |     | (c) <i>Cohort study</i> —Summarise follow-up time (eg, average and total amount)                                                                                                                             | 7-8        | Lines 149-155          |
| 23 |                        |     |                                                                                                                                                                                                              |            |                        |
| 24 | Outcome data           | 15* | <i>Cohort study</i> —Report numbers of outcome events or summary measures over time                                                                                                                          | 7-8        | Lines 149-164          |
| 25 |                        |     | <i>Case-control study</i> —Report numbers in each exposure category, or summary measures of exposure                                                                                                         |            |                        |
| 26 |                        |     | <i>Cross-sectional study</i> —Report numbers of outcome events or summary measures                                                                                                                           |            |                        |
| 27 |                        |     |                                                                                                                                                                                                              |            |                        |
| 28 | Main results           | 16  | (a) Give unadjusted estimates and, if applicable, confounder-adjusted estimates and their precision (eg, 95% confidence interval). Make clear which confounders were adjusted for and why they were included | 8-9        | Lines 165-212          |
| 29 |                        |     | (b) Report category boundaries when continuous variables were categorized                                                                                                                                    | 5          | Lines 105-106          |
| 30 |                        |     | (c) If relevant, consider translating estimates of relative risk into absolute risk for a meaningful time period                                                                                             | N/A        |                        |
| 31 |                        |     |                                                                                                                                                                                                              |            |                        |
| 32 |                        |     |                                                                                                                                                                                                              |            |                        |
| 33 |                        |     |                                                                                                                                                                                                              |            |                        |
| 34 |                        |     |                                                                                                                                                                                                              |            |                        |
| 35 |                        |     |                                                                                                                                                                                                              |            |                        |
| 36 |                        |     |                                                                                                                                                                                                              |            |                        |
| 37 |                        |     |                                                                                                                                                                                                              |            |                        |
| 38 | Continued on next page |     |                                                                                                                                                                                                              |            |                        |
| 39 |                        |     |                                                                                                                                                                                                              |            |                        |
| 40 |                        |     |                                                                                                                                                                                                              |            |                        |
| 41 |                        |     |                                                                                                                                                                                                              |            |                        |
| 42 |                        |     |                                                                                                                                                                                                              |            |                        |
| 43 |                        |     |                                                                                                                                                                                                              |            |                        |
| 44 |                        |     |                                                                                                                                                                                                              |            |                        |
| 45 |                        |     |                                                                                                                                                                                                              |            |                        |
| 46 |                        |     |                                                                                                                                                                                                              |            |                        |
| 47 |                        |     |                                                                                                                                                                                                              |            |                        |
| 48 |                        |     |                                                                                                                                                                                                              |            |                        |

1  
2  
3  
4  
5  
6  
7  
8  
9  
10  
11  
12  
13  
14  
15  
16  
17  
18  
19  
20  
21  
22  
23  
24  
25  
26  
27  
28  
29  
30  
31  
32  
33  
34  
35  
36  
37  
38  
39  
40  
41  
42  
43  
44  
45  
46  
47  
48  
49  
50

|                          |    |                                                                                                                                                                            |            |               |
|--------------------------|----|----------------------------------------------------------------------------------------------------------------------------------------------------------------------------|------------|---------------|
| Other analyses           | 17 | Report other analyses done—eg analyses of subgroups and interactions, and sensitivity analyses                                                                             | 10         | Lines 213-216 |
| <b>Discussion</b>        |    |                                                                                                                                                                            |            |               |
| Key results              | 18 | Summarise key results with reference to study objectives                                                                                                                   | 11         | Lines 220-229 |
| Limitations              | 19 | Discuss limitations of the study, taking into account sources of potential bias or imprecision. Discuss both direction and magnitude of any potential bias                 | 13-15      | Lines 280-307 |
| Interpretation           | 20 | Give a cautious overall interpretation of results considering objectives, limitations, multiplicity of analyses, results from similar studies, and other relevant evidence | 11-13      | Lines 230-279 |
| Generalisability         | 21 | Discuss the generalisability (external validity) of the study results                                                                                                      | 13-15      | Lines 280-307 |
| <b>Other information</b> |    |                                                                                                                                                                            |            |               |
| Funding                  | 22 | Give the source of funding and the role of the funders for the present study and, if applicable, for the original study on which the present article is based              | Title page |               |

\*Give information separately for cases and controls in case-control studies and, if applicable, for exposed and unexposed groups in cohort and cross-sectional studies.

**Note:** An Explanation and Elaboration article discusses each checklist item and gives methodological background and published examples of transparent reporting. The STROBE checklist is best used in conjunction with this article (freely available on the Web sites of PLoS Medicine at <http://www.plosmedicine.org/>, Annals of Internal Medicine at <http://www.annals.org/>, and Epidemiology at <http://www.epidem.com/>). Information on the STROBE Initiative is available at [www.strobe-statement.org](http://www.strobe-statement.org).
