# Supplementary figures and images for: Prepregnancy body mass index and other risk factors for early-onset and late-onset haemolysis, elevated liver enzymes and low platelets (HELLP) syndrome: a population-based retrospective cohort study in British Columbia, Canada
Source: HighWire-hosted journal article supplement (doi:10.1136/bmjopen-2023-079131), 2024-03-01

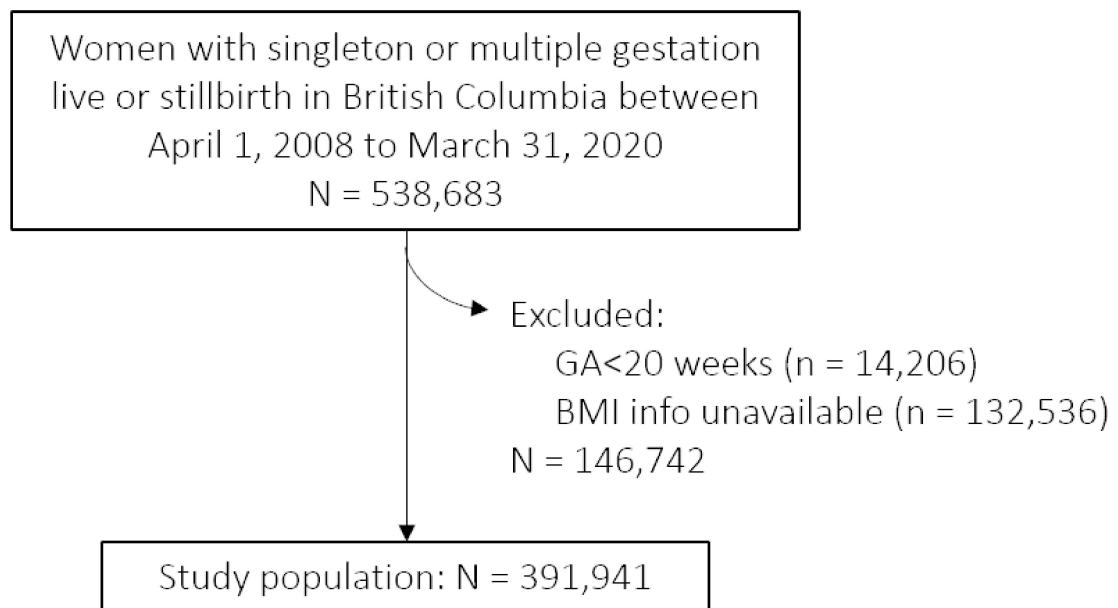

Supplemental Figure 1. Flowchart of study sample selection.

Supplement: bmjopen-2023-079131supp002_data_supplement.pdf [file bmjopen-2023-079131supp002_data_supplement.pdf]
